# Supplementary material for: MicroRNA Expression Profiling Reveals MiRNA Families Regulating Specific Biological Pathways in Mouse Frontal Cortex and Hippocampus
Source: PubMed Central journal article supplement (PMC3120887; doi:10.1371/journal.pone.0021495), 2011-06-22

C57BL/6J

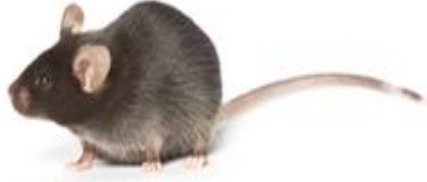

C57BL/6J

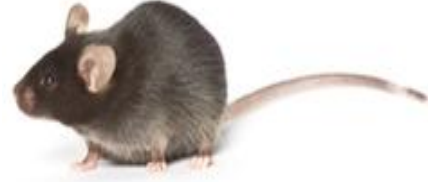

C57BL/6J

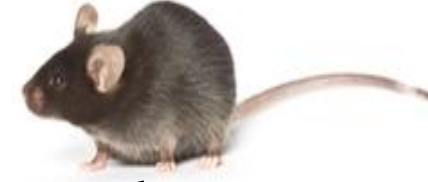

3 FCx pooled and total RNA extracted

3 HP pooled and total RNA extracted

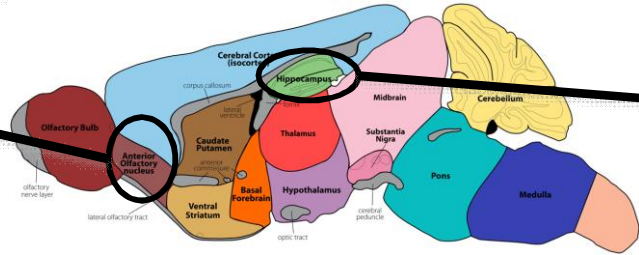

miRNA library preparation with three indexes (Index 3, 7 and 11).

miRNA library preparation with three indexes (Index 3, 7 and 11).

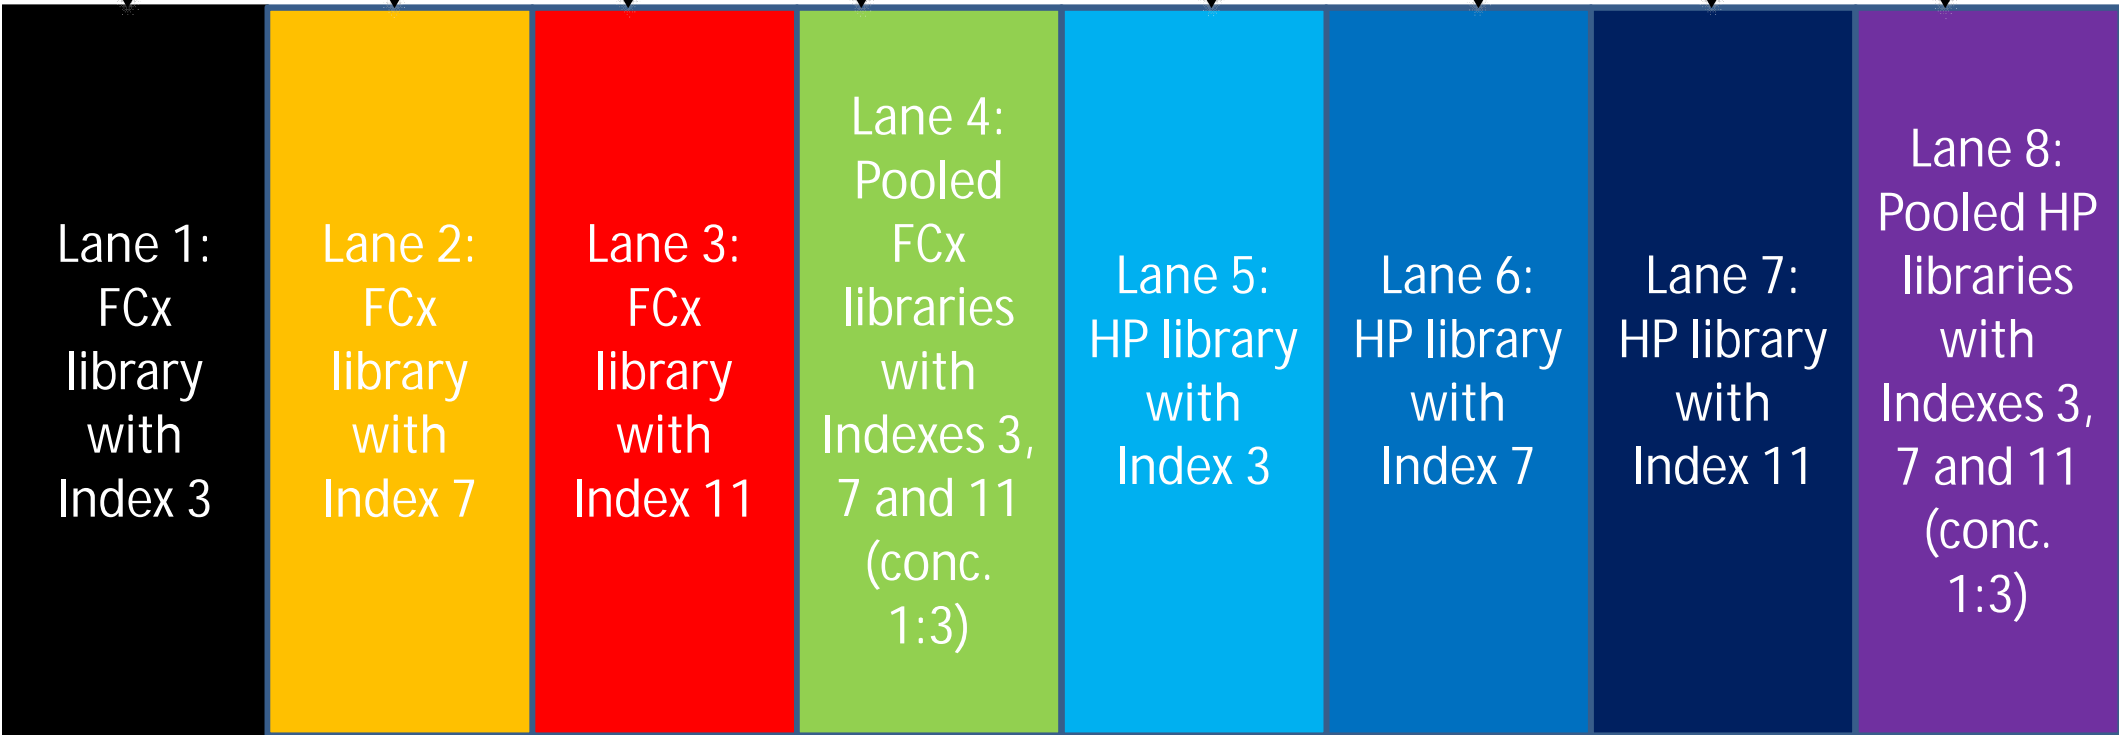

Supplement: pone.0021495.s001.pdf [file pone.0021495.s001.pdf]
