# Supplementary material for: MicroRNA Expression Profiling Reveals MiRNA Families Regulating Specific Biological Pathways in Mouse Frontal Cortex and Hippocampus
Source: PubMed Central journal article supplement (PMC3120887; doi:10.1371/journal.pone.0021495), 2011-06-22

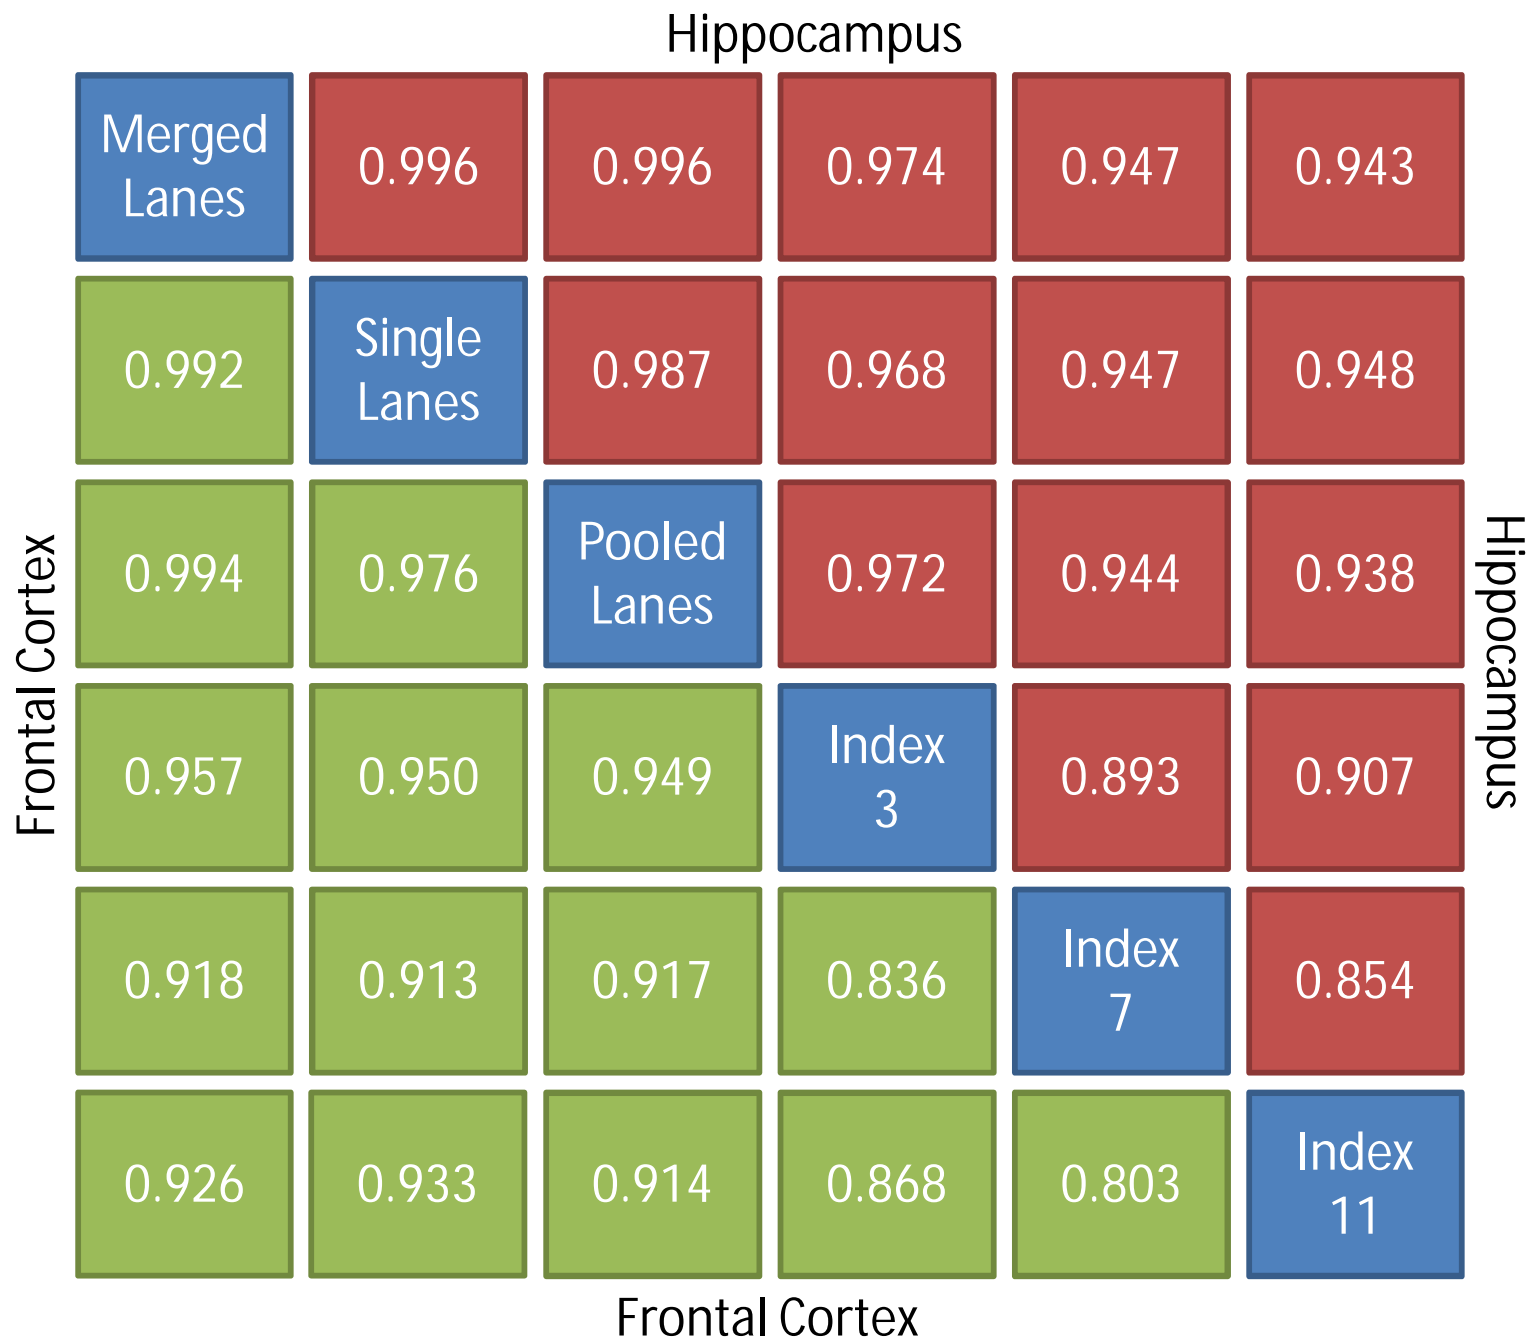

Supplement: pone.0021495.s002.pdf [file pone.0021495.s002.pdf]
