# Supplementary material for: MicroRNA Expression Profiling Reveals MiRNA Families Regulating Specific Biological Pathways in Mouse Frontal Cortex and Hippocampus
Source: PubMed Central journal article supplement (PMC3120887; doi:10.1371/journal.pone.0021495), 2011-06-22
Supplement: pone.0021495.s004.pdf [file pone.0021495.s004.pdf]

**Supplemental Table S2. Pathways of predicted target genes for miRNA clusters and families detected as differentially expressed between FCx and HP.** Target genes were predicted using miRWALK for miRNAs belonging to the differentially expressed families/clusters. IPA software was used to identify biological pathways over-represented within the target genes of each family/cluster. Overlap is the number of targets in the dataset over the total number of molecules in the pathway.

| Mir-8 Family                                                          | P-Value  | Target Genes                                                                                                                                                                                       | Overlap      |
|-----------------------------------------------------------------------|----------|----------------------------------------------------------------------------------------------------------------------------------------------------------------------------------------------------|--------------|
| Ephrin Receptor Signaling                                             | 3,02E-03 | <i>Rap1b, Epha7, Gnai3, Efnb2, Wipf1, Angpt1, Cfl2, Cxcl12, Mras, Map4k4, Epha2, Efn1</i>                                                                                                          | 12/186 (6%)  |
| Axonal Guidance Signaling                                             | 6,76E-03 | <i>Epha7, Rap1b, Prkacb, Sema6a, Slit2, Efn1, Efnb2, Sema3a, Gnai3, Wipf1, Nfat5, Ntrk2, Adam12, Gli3, Cxcl12, Cfl2, Mknk1, Mras, Epha2</i>                                                        | 19/381 (5%)  |
| Ceramide Signaling                                                    | 7,24E-03 | <i>Map2k4, Jun, Ppp2r5c, Map3k1, Mras, Ppp2r2c, Nsmaf</i>                                                                                                                                          | 7/81 (9%)    |
| Cdk5 Signaling                                                        | 1,00E-02 | <i>Prkacb, Fosb, Ntrk2, Ppp2r5c, Mras, Ppp2r2c, Cdk5r1</i>                                                                                                                                         | 7/86 (8%)    |
| Toll-Like Receptor Signaling                                          | 1,10E-02 | <i>Map2k4, Tlr4, Jun, Map3k1, Map4k4</i>                                                                                                                                                           | 5/48 (10%)   |
| Erk/Mapk Signaling                                                    | 1,35E-02 | <i>Rap1b, Prkacb, Mycn, Ywhag, Ppp2r5c, Dusp1, Mknk1, Mras, Ywhaz, Ppp2r2c, Elf5</i>                                                                                                               | 11/191 (6%)  |
| Cell Cycle Regulation By Btg Family Proteins                          | 1,48E-02 | <i>Ccne2, Ppp2r5c, Ppp2r2c, E2f3</i>                                                                                                                                                               | 4/34 (12%)   |
| Ascorbate And Aldarate Metabolism                                     | 1,78E-02 | <i>Aldh1b1, Aldh1a1, Aldh1a7</i>                                                                                                                                                                   | 3/20 (15%)   |
| April Mediated Signaling                                              | 2,14E-02 | <i>Map2k4, Nfat5, Jun, Map3k1</i>                                                                                                                                                                  | 4/40 (10%)   |
| Lysine Degradation                                                    | 2,19E-02 | <i>Aldh1b1, Bbox1, Aldh1a1, Aldh1a7, Suv39h2</i>                                                                                                                                                   | 5/57 (9%)    |
| P70s6k Signaling                                                      | 2,19E-02 | <i>Gnai3, Ywhag, F2r, Ppp2r5c, Mras, Ywhaz, Ppp2r2c, Egfr</i>                                                                                                                                      | 8/125 (6%)   |
| B Cell Activating Factor Signaling                                    | 2,57E-02 | <i>Map2k4, Nfat5, Jun, Map3k1</i>                                                                                                                                                                  | 4/42 (10%)   |
| Rac Signaling                                                         | 2,63E-02 | <i>Map2k4, Tiam1, Jun, Cfl2, Map3k1, Mras, Cdk5r1</i>                                                                                                                                              | 7/113 (6%)   |
| Glycosphingolipid Biosynthesis - Neolactoseries                       | 2,88E-02 | <i>Gcnt2, St3gal6, B3gnt1</i>                                                                                                                                                                      | 3/24 (13%)   |
| Production Of Nitric Oxide And Reactive Oxygen Species In Macrophages | 2,88E-02 | <i>Map2k4, Rap1b, Tlr4, Jun, Ppp2r5c, Rnd3, Map3k1, Ifngr2, Ppp2r2c</i>                                                                                                                            | 9/158 (6%)   |
| Erk5 Signaling                                                        | 3,02E-02 | <i>Ywhag, Mras, Ywhaz, Wnk1, Egfr</i>                                                                                                                                                              | 5/64 (8%)    |
| Chondroitin Sulfate Biosynthesis                                      | 3,72E-02 | <i>Chsy1, Hs3st1, Chst10, Ndst1</i>                                                                                                                                                                | 4/45 (9%)    |
| Aggrin Interactions At Neuromuscular Junction                         | 3,80E-02 | <i>Map2k4, Jun, Mras, Gabpa, Egfr</i>                                                                                                                                                              | 5/66 (8%)    |
| Tnfr1 Signaling                                                       | 3,98E-02 | <i>Map2k4, Jun, Casp2, Map3k1</i>                                                                                                                                                                  | 4/48 (8%)    |
| Egf Signaling                                                         | 3,98E-02 | <i>Map2k4, Jun, Map3k1, Egfr</i>                                                                                                                                                                   | 4/47 (9%)    |
| Il-1 Signaling                                                        | 4,17E-02 | <i>Map2k4, Prkacb, Gnai3, Jun, Map3k1, Mras</i>                                                                                                                                                    | 6/95 (6%)    |
| Keratan Sulfate Biosynthesis                                          | 4,27E-02 | <i>Hs3st1, Chst10, Ndst1, B3gnt1</i>                                                                                                                                                               | 4/47 (9%)    |
| Gaba Receptor Signaling                                               | 4,27E-02 | <i>Slc6a11, Slc6a1, Gphn, Ap2a2</i>                                                                                                                                                                | 4/47 (9%)    |
| Tnfr2 Signaling                                                       | 4,27E-02 | <i>Map2k4, Jun, Map3k1</i>                                                                                                                                                                         | 3/30 (10%)   |
| 4-1bb Signaling In T Lymphocytes                                      | 4,68E-02 | <i>Map2k4, Jun, Map3k1</i>                                                                                                                                                                         | 3/31 (10%)   |
| Hmgb1 Signaling                                                       | 4,68E-02 | <i>Map2k4, Tlr4, Jun, Rnd3, Mras, Ifngr2</i>                                                                                                                                                       | 6/94 (6%)    |
| Mir-182, Mir-183 And Mir-96 Cluster                                   | P-Value  | Target Genes                                                                                                                                                                                       | Overlap      |
| Alpha-Adrenergic Signaling                                            | 2,95E-05 | <i>Prkacb, Adra2a, Gnai3, Mras, Adcy6, Gnaq, Prkch, Gng5, Map2k1, Gng4, Prkar1a, Gys2</i>                                                                                                          | 12/90 (13%)  |
| P2y Purigenic Receptor Signaling Pathway                              | 1,17E-04 | <i>Prkacb, Rac1, Adcy6, Gnaq, Gng5, Pik3r3, Gnai3, Creb1, Mras, Prkch, Map2k1, Gng4, Prkar1a</i>                                                                                                   | 13/117 (11%) |
| Ephrin Receptor Signaling                                             | 1,55E-04 | <i>Gnaq, Rac1, Limk2, Epha4, Epha3, Gng5, Efnb2, Gnai3, Ephb1, Wipf1, Wasl (Includes Eg:8976), Sdc2, Creb1, Mras, Gng4, Map2k1</i>                                                                 | 16/185 (9%)  |
| Igf-1 Signaling                                                       | 1,95E-04 | <i>Prkacb, Pik3r3, Ywhag, Foxo1, Irs1, Foxo3, Mras, Rac1, Prkch, Map2k1, Prkar1a</i>                                                                                                               | 11/93 (12%)  |
| Role Of Nfat In Cardiac Hypertrophy                                   | 3,24E-04 | <i>Prkacb, Gnaq, Rac1, Adcy6, Hand1, Hdac9 (Includes Eg:9734), Gng5, Pik3r3, Gnai3, Ppp3r1, Mras, Prkch, Mef2c, Gng4, Map2k1, Prkar1a</i>                                                          | 16/188 (9%)  |
| Cardiac Hypertrophy Signaling                                         | 3,55E-04 | <i>Prkacb, Gnaq, Adcy6, Hand1, Gng5, Pik3r3, Adra2a, Gnai3, Ppp3r1, Irs1, Creb1, Mras, Adra2c, Mef2c, Gng4, Map2k1, Tab1, Prkar1a</i>                                                              | 18/221 (8%)  |
| Breast Cancer Regulation By Stathmin1                                 | 3,89E-04 | <i>Prkacb, Ppp2r5c, Gnaq, Rac1, Adcy6, Limk2, Gng5, Pik3r3, Ppp2cb, Gnai3, Mras, Prkch, Arhgef3, Gng4, Map2k1, Prkar1a</i>                                                                         | 16/184 (9%)  |
| Phospholipase C Signaling                                             | 3,89E-04 | <i>Napepld, Rala, Gnaq, Rac1, Adcy6, Hdac9 (Includes Eg:9734), Gng5, Cd3d, Pld1, Nfat5, Ppp3r1, Creb1, Mras, Mef2c, Prkch, Arhgef3, Gng4, Map2k1</i>                                               | 18/232 (8%)  |
| Axonal Guidance Signaling                                             | 4,07E-04 | <i>Prkacb, Gli2, Epha4, Limk2, Efnb2, Ephb1, Wasl (Includes Eg:8976), Nfat5, Sdc2, Ppp3r1, Dcc, Mras, Gng4, Map2k1, Rac1, Pfn2, Gnaq, Epha3, Gng5, Pik3r3, Gnai3, Dock1, Wipf1, Prkch, Prkar1a</i> | 25/378 (7%)  |
| Pi3k/Akt Signaling                                                    | 4,47E-04 | <i>Pik3r3, Ppp2cb, Ywhag, Foxo1, Ppp2r5c, Foxo3, Mras, Rac1, Lims1, Inpp1, Map2k1, Gys2</i>                                                                                                        | 12/126 (10%) |
| P70s6k Signaling                                                      | 6,61E-04 | <i>Pik3r3, Ppp2cb, Gnai3, Ywhag, Ppp2r5c, Irs1, Mras, Rac1, Gnaq, Prkch, Map2k1, Pld1</i>                                                                                                          | 12/123 (10%) |
| G Beta Gamma Signaling                                                | 6,76E-04 | <i>Prkacb, Gnai3, Mras, Rac1, Gnaq, Hbegf, Prkch, Gng5, Gng4, Prkar1a</i>                                                                                                                          | 10/97 (10%)  |

|                                                                      |          |                                                                                                                                                                      |             |
|----------------------------------------------------------------------|----------|----------------------------------------------------------------------------------------------------------------------------------------------------------------------|-------------|
| Relaxin Signaling                                                    | 8,71E-04 | <i>Prkacb, Pik3r3, Gnai3, Creb1, Mras, Rac1, Adcy6, Gnaq, Gng5, Map2k1, Gng4, Prkar1a</i>                                                                            | 12/130 (9%) |
| Insulin Receptor Signaling                                           | 1,10E-03 | <i>Prkacb, Pik3r3, Foxo1, Irs1, Foxo3, Mras, Rac1, Inpp1, Prkch, Map2k1, Prkar1a, Gys2</i>                                                                           | 12/128 (9%) |
| Creb Signaling In Neurons                                            | 1,26E-03 | <i>Prkacb, Gria1, Rac1, Adcy6, Gnaq, Gng5, Pik3r3, Gnai3, Creb1, Mras, Prkch, Map2k1, Gng4, Prkar1a</i>                                                              | 14/177 (8%) |
| Melanocyte Development And Pigmentation Signaling                    | 1,59E-03 | <i>Prkacb, Pik3r3, Rps6ka6, Mitf, Creb1, Mras, Adcy6, Map2k1, Prkar1a</i>                                                                                            | 9/83 (11%)  |
| Il-4 Signaling                                                       | 1,66E-03 | <i>Pik3r3, Stat6, Nfat5, Il13ra1, Irs1, Mras, Rac1, Inpp1</i>                                                                                                        | 8/68 (12%)  |
| Protein Kinase A Signaling                                           | 1,74E-03 | <i>Prkacb, Ywhag, Gnaq, Adcy6, Akap6, Gng5, Akap7, Gys2, Gnai3, Nfat5, Add3, Ppp3r1, Creb1, Dcc, Prkch, Kdelr1, Gng4, Map2k1, Tcf7l2 (Includes Eg:6934), Prkar1a</i> | 20/294 (7%) |
| Camp-Mediated Signaling                                              | 1,95E-03 | <i>Prkacb, Rgs2, Htr4, Adcy6, Akap6, Akap7, Adra2a, Ppp3r1, Creb1, Adra2c, Htr1a, Map2k1, Prkar1a</i>                                                                | 13/155 (8%) |
| Factors Promoting Cardiogenesis In Vertebrates                       | 2,24E-03 | <i>Tgfbf3, Lrp6, Acvr1, Tdgf1, Mef2c, Prkch, Smad1, Acvr1c, Tcf7l2 (Includes Eg:6934)</i>                                                                            | 9/88 (10%)  |
| Il-3 Signaling                                                       | 2,40E-03 | <i>Pik3r3, Stat6, Foxo1, Ppp3r1, Mras, Rac1, Prkch, Map2k1</i>                                                                                                       | 8/72 (11%)  |
| Ppar-Alpha/Rxr-Alpha Activation                                      | 2,40E-03 | <i>Prkacb, Med1, Tgfbf3, Acvr1, Adcy6, Gnaq, Gk, Irs1, Mras, Clock, Map2k1, Acvr1c, Prkar1a</i>                                                                      | 13/164 (8%) |
| Fc-Gamma Receptor-Mediated Phagocytosis In Macrophages And Monocytes | 2,57E-03 | <i>Pik3r3, Dock1, Napepld, Ezr, Rac1, Vamp3, Tln1, Prkch, Pld1</i>                                                                                                   | 9/90 (10%)  |
| Fmlp Signaling In Neutrophils                                        | 2,63E-03 | <i>Pik3r3, Gnai3, Nfat5, Ppp3r1, Mras, Rac1, Prkch, Gng5, Map2k1, Gng4</i>                                                                                           | 10/111 (9%) |
| Il-1 Signaling                                                       | 2,82E-03 | <i>Prkacb, Gnai3, Mras, Adcy6, Gnaq, Gng5, Gng4, Tab1, Prkar1a</i>                                                                                                   | 9/94 (10%)  |
| G-Protein Coupled Receptor Signaling                                 | 3,31E-03 | <i>Prkacb, Rgs2, Ednrb, Htr4, Gnaq, Rac1, Adcy6, Adra2a, Pik3r3, Creb1, Mras, Adra2c, Htr1a, Map2k1, Prkar1a</i>                                                     | 15/206 (7%) |
| Corticotropin Releasing Hormone Signaling                            | 3,47E-03 | <i>Prkacb, Gnai3, Gli2, Creb1, Adcy6, Gnaq, Mef2c, Prkch, Map2k1, Prkar1a</i>                                                                                        | 10/116 (9%) |
| Role Of Nfat In Regulation Of The Immune Response                    | 3,55E-03 | <i>Csnk1g3, Rac1, Gnaq, Gng5, Cd3d, Pik3r3, Gnai3, Nfat5, Ppp3r1, Mras, Mef2c, Map2k1, Gng4</i>                                                                      | 13/177 (7%) |
| Molecular Mechanisms Of Cancer                                       | 3,63E-03 | <i>Prkacb, Rala, Lrp6, Gnaq, Adcy6, Rac1, Psen2, Pik3r3, Gnai3, Nf1, Foxo1, Irs1, Mras, Prkch, Arhgef3, Pmaip1, Map2k1, Smad1, Tab1, Prkar1a, Atm</i>                | 21/347 (6%) |
| Integrin Signaling                                                   | 3,80E-03 | <i>Capn6, Parva, Rala, Rac1, Tln1, Lims1, Tnk2, Pik3r3, Dock1, Wipf1, Wasl (Includes Eg:8976), Arf4, Mras, Map2k1</i>                                                | 14/195 (7%) |
| Ampk Signaling                                                       | 4,07E-03 | <i>Prkacb, Adra2a, Pik3r3, Ppp2cb, Ppp2r5c, Irs1, Mras, Rac1, Adra2c, Prkar1a, Gys2</i>                                                                              | 11/136 (8%) |
| Erk5 Signaling                                                       | 4,37E-03 | <i>Rps6ka6, Ywhag, Creb1, Foxo3, Mras, Gnaq, Mef2c</i>                                                                                                               | 7/64 (11%)  |
| Cardiac Beta-Adrenergic Signaling                                    | 6,03E-03 | <i>Prkacb, Ppp2cb, Ppp2r5c, Mras, Adcy6, Akap6, Gng5, Gng4, Akap7, Prkar1a</i>                                                                                       | 10/121 (8%) |
| Gnrh Signaling                                                       | 6,46E-03 | <i>Prkacb, Gnai3, Creb1, Mras, Rac1, Adcy6, Gnaq, Prkch, Map2k1, Prkar1a</i>                                                                                         | 10/125 (8%) |
| Synaptic Long Term Potentiation                                      | 6,92E-03 | <i>Prkacb, Gria1, Ppp3r1, Creb1, Mras, Gnaq, Prkch, Map2k1, Prkar1a</i>                                                                                              | 9/102 (9%)  |
| Cdk5 Signaling                                                       | 7,24E-03 | <i>Prkacb, Lamc1, Ppp2cb, Ppp2r5c, Mras, Adcy6, Map2k1, Prkar1a</i>                                                                                                  | 8/86 (9%)   |
| Pak Signaling                                                        | 7,24E-03 | <i>Pik3r3, Wasl (Includes Eg:8976), Mras, Rac1, Dscam, Limk2, Epha3, Map2k1</i>                                                                                      | 8/97 (8%)   |
| Renin-Angiotensin Signaling                                          | 7,76E-03 | <i>Prkacb, Pik3r3, Mras, Rac1, Adcy6, Gnaq, Prkch, Map2k1, Prkar1a</i>                                                                                               | 9/105 (9%)  |
| Wnt/Beta-Catenin Signaling                                           | 8,13E-03 | <i>Ppp2cb, Ppp2r5c, Csnk1g3, Tgfbf3, Lrp6, Acvr1, Rac1, Gnaq, Rarg, Acvr1c, Tcf7l2 (Includes Eg:6934), Tab1</i>                                                      | 12/163 (7%) |
| Amyloid Processing                                                   | 8,13E-03 | <i>Prkacb, Capn6, Rac1, Psen2, Bace2, Prkar1a</i>                                                                                                                    | 6/54 (11%)  |
| Regulation Of Eif4 And P70s6k Signaling                              | 8,32E-03 | <i>Pik3r3, Ppp2cb, Ppp2r5c, Eif4ebp2, Irs1, Mras, Rac1, Paip2, Map2k1</i>                                                                                            | 9/118 (8%)  |
| Pten Signaling                                                       | 8,32E-03 | <i>Pik3r3, Magi1, Foxo1, Foxo3, Mras, Rac1, Inpp1, Map2k1</i>                                                                                                        | 8/96 (8%)   |
| Il-8 Signaling                                                       | 8,91E-03 | <i>Pik3r3, Gnai3, Napepld, Mras, Rac1, Hbegf, Limk2, Prkch, Gng5, Map2k1, Gng4, Pld1</i>                                                                             | 12/169 (7%) |
| Bmp Signaling Pathway                                                | 9,33E-03 | <i>Prkacb, Creb1, Mras, Smad1, Map2k1, Tab1, Prkar1a</i>                                                                                                             | 7/73 (10%)  |
| Dopamine Receptor Signaling                                          | 1,00E-02 | <i>Prkacb, Ppp2cb, Ppp2r5c, Adcy6, Qdpr, Maoa, Prkar1a</i>                                                                                                           | 7/72 (10%)  |
| Ccr3 Signaling In Eosinophils                                        | 1,05E-02 | <i>Pik3r3, Gnai3, Mras, Rac1, Limk2, Prkch, Gng5, Map2k1, Gng4</i>                                                                                                   | 9/113 (8%)  |
| Androgen Signaling                                                   | 1,05E-02 | <i>Prkacb, Gnai3, Myst2, Mras, Gnaq, Prkch, Gng5, Gng4, Prkar1a</i>                                                                                                  | 9/120 (8%)  |
| Cxcr4 Signaling                                                      | 1,12E-02 | <i>Pik3r3, Dock1, Gnai3, Mras, Rac1, Adcy6, Gnaq, Prkch, Gng5, Map2k1, Gng4</i>                                                                                      | 11/153 (7%) |
| Flt3 Signaling In Hematopoietic Progenitor Cells                     | 1,15E-02 | <i>Pik3r3, Stat6, Rps6ka6, Creb1, Mras, Rac1, Map2k1</i>                                                                                                             | 7/75 (9%)   |
| Leptin Signaling In Obesity                                          | 1,15E-02 | <i>Prkacb, Pik3r3, Foxo1, Rac1, Adcy6, Map2k1, Prkar1a</i>                                                                                                           | 7/75 (9%)   |
| Mtor Signaling                                                       | 1,48E-02 | <i>Pik3r3, Ppp2cb, Rps6ka6, Napepld, Ppp2r5c, Irs1, Mras, Rac1, Prkch, Pld1</i>                                                                                      | 10/141 (7%) |

|                                                                      |                |                                                                                                       |                |
|----------------------------------------------------------------------|----------------|-------------------------------------------------------------------------------------------------------|----------------|
| Melanoma Signaling                                                   | 1,51E-02       | <i>Pik3r3, Mitf, Mras, Rac1, Map2k1</i>                                                               | 5/45 (11%)     |
| Serotonin Receptor Signaling                                         | 1,66E-02       | <i>Htr4, Htr1a, Qdpr, Maa</i>                                                                         | 4/30 (13%)     |
| O-Glycan Biosynthesis                                                | 1,86E-02       | <i>Galnt7, Galnt1, Galnt2, Fut4</i>                                                                   | 4/31 (13%)     |
| Ccr5 Signaling In Macrophages                                        | 2,09E-02       | <i>Gnai3, Mras, Prkch, Gng5, Cd3d, Gng4</i>                                                           | 6/77 (8%)      |
| G Protein Signaling Mediated By Tubby                                | 2,09E-02       | <i>Mras, Gnaq, Gng5, Gng4</i>                                                                         | 4/35 (11%)     |
| Thrombin Signaling                                                   | 2,14E-02       | <i>Pik3r3, Gnai3, Creb1, Mras, Rac1, Adcy6, Gnaq, Prkch, Arhgef3, Gng5, Map2k1, Gng4</i>              | 12/189 (6%)    |
| Rhoa Signaling                                                       | 2,14E-02       | <i>Ktn1, Ezr, Rdx, Pfn2, Arhgap12, Rapgef6, Limk2, Pld1</i>                                           | 8/103 (8%)     |
| Melatonin Signaling                                                  | 2,40E-02       | <i>Prkacb, Gnai3, Gnaq, Prkch, Map2k1, Prkar1a</i>                                                    | 6/67 (9%)      |
| Non-Small Cell Lung Cancer Signaling                                 | 2,40E-02       | <i>Pik3r3, Rassf1, Foxo3, Mras, Rac1, Map2k1</i>                                                      | 6/73 (8%)      |
| Fak Signaling                                                        | 2,57E-02       | <i>Pik3r3, Dock1, Capn6, Mras, Rac1, Tln1, Map2k1</i>                                                 | 7/96 (7%)      |
| Neuregulin Signaling                                                 | 2,75E-02       | <i>Pik3r3, Erbb2ip (Includes Eg:55914), Mras, Rac1, Hbegf, Prkch, Map2k1</i>                          | 7/96 (7%)      |
| Lps-Stimulated Mapk Signaling                                        | 2,88E-02       | <i>Pik3r3, Creb1, Mras, Rac1, Prkch, Map2k1</i>                                                       | 6/73 (8%)      |
| Sapk/Jnk Signaling                                                   | 3,02E-02       | <i>Pik3r3, Irs1, Dusp10, Mras, Rac1, Gng5, Tab1</i>                                                   | 7/95 (7%)      |
| Pi3k Signaling In B Lymphocytes                                      | 3,09E-02       | <i>Nfat5, Irs1, Ppp3r1, Creb1, Foxo3, Mras, Rac1, Prkch, Map2k1</i>                                   | 9/134 (7%)     |
| Erk/Mapk Signaling                                                   | 3,16E-02       | <i>Prkacb, Pik3r3, Ppp2cb, Ywhag, Ppp2r5c, Creb1, Mras, Rac1, Tln1, Map2k1, Prkar1a</i>               | 11/184 (6%)    |
| Natural Killer Cell Signaling                                        | 3,24E-02       | <i>Pik3r3, Sh2d1a, Mras, Rac1, Inpp1, Prkch, Map2k1</i>                                               | 7/92 (8%)      |
| Clathrin-Mediated Endocytosis Signaling                              | 3,24E-02       | <i>Pik3r3, Wasl (Includes Eg:8976), Ldlr, Fgf9, Ppp3r1, Amph, Rac1, Sh3glb1, Sh3kbp1, Ctt</i>         | 10/159 (6%)    |
| Antiproliferative Role Of Somatostatin Receptor 2                    | 3,24E-02       | <i>Pik3r3, Mras, Adcy6, Gng5, Map2k1, Gng4</i>                                                        | 6/74 (8%)      |
| Endometrial Cancer Signaling                                         | 3,31E-02       | <i>Pik3r3, Foxo3, Mras, Rac1, Map2k1</i>                                                              | 5/56 (9%)      |
| Neuroprotective Role Of Thop1 In Alzheimer's Disease                 | 3,72E-02       | <i>Prkacb, Mme, Creb1, Prkar1a</i>                                                                    | 4/39 (10%)     |
| Leukocyte Extravasation Signaling                                    | 3,72E-02       | <i>Pik3r3, Gnai3, Wipf1, Wasl (Includes Eg:8976), Cldn1, Ezr, Rac1, Rdx, Arhgap12, Prkch, Ctt</i>     | 11/180 (6%)    |
| Synaptic Long Term Depression                                        | 3,80E-02       | <i>Ppp2cb, Gnai3, Ppp2r5c, Gria1, Mras, Adcy6, Gnaq, Prkch, Map2k1</i>                                | 9/142 (6%)     |
| Actin Cytoskeleton Signaling                                         | 4,07E-02       | <i>Pik3r3, Dock1, Wasl (Includes Eg:8976), Ezr, Fgf9, Mras, Rac1, Rdx, Pfn2, Limk2, Wasf2, Map2k1</i> | 12/218 (6%)    |
| T Cell Receptor Signaling                                            | 4,27E-02       | <i>Pik3r3, Nfat5, Ppp3r1, Mras, Rac1, Map2k1, Cd3d</i>                                                | 7/100 (7%)     |
| Tgf-Beta Signaling                                                   | 4,27E-02       | <i>Acvr1, Mras, Smad1, Map2k1, Acvr1c, Tab1</i>                                                       | 6/79 (8%)      |
| Docosahexaenoic Acid (Dha) Signaling                                 | 4,37E-02       | <i>Pik3r3, Foxo1, Rac1, Pnpla2</i>                                                                    | 4/41 (10%)     |
| Rar Activation                                                       | 4,47E-02       | <i>Prkacb, Pik3r3, Med1, Rac1, Adcy6, Prkch, Smad1, Map2k1, Rarg, Prkar1a</i>                         | 10/166 (6%)    |
| Acute Myeloid Leukemia Signaling                                     | 4,57E-02       | <i>Pik3r3, Cebpa, Mras, Rac1, Map2k1, Tcf7l2 (Includes Eg:6934)</i>                                   | 6/79 (8%)      |
| Ceramide Signaling                                                   | 4,79E-02       | <i>Pik3r3, Ppp2cb, Ppp2r5c, Mras, Rac1, Map2k1</i>                                                    | 6/80 (8%)      |
| Il-12 Signaling And Production In Macrophages                        | 4,90E-02       | <i>Pik3r3, Stat6, Il12a, Maf, Rac1, Prkch, Map2k1</i>                                                 | 7/104 (7%)     |
| <b>Mir-132 Family</b>                                                | <b>P-Value</b> | <b>Target Genes</b>                                                                                   | <b>Overlap</b> |
| Regulation Of Eif4 And P70s6k Signaling                              | 7,76E-04       | <i>Rps6kb1, Eif2s2, Rras2, Ppp2r4, Paip2, Pik3r4</i>                                                  | 6/118 (5%)     |
| Hereditary Breast Cancer Signaling                                   | 1,32E-03       | <i>Rb1, Hdac3, Rras2, Rfc1, Pik3r4, Ep300</i>                                                         | 6/119 (5%)     |
| Chronic Myeloid Leukemia Signaling                                   | 3,09E-03       | <i>Rb1, Hdac3, Rras2, E2f5, Pik3r4</i>                                                                | 5/101 (5%)     |
| Cell Cycle Regulation By Btg Family Proteins                         | 5,13E-03       | <i>Rb1, Ppp2r4, E2f5</i>                                                                              | 3/34 (9%)      |
| Ceramide Signaling                                                   | 9,12E-03       | <i>Rras2, Ppp2r4, Pik3r4, Tnfrsf11b</i>                                                               | 4/80 (5%)      |
| Melanocyte Development And Pigmentation Signaling                    | 1,05E-02       | <i>Rps6kb1, Rras2, Pik3r4, Ep300</i>                                                                  | 4/83 (5%)      |
| Melanoma Signaling                                                   | 1,07E-02       | <i>Rb1, Rras2, Pik3r4</i>                                                                             | 3/45 (7%)      |
| Vegf Signaling                                                       | 1,17E-02       | <i>Eif2s2, Rras2, Actb, Pik3r4</i>                                                                    | 4/89 (4%)      |
| P53 Signaling                                                        | 1,32E-02       | <i>Rb1, Rrm2b, Pik3r4, Ep300</i>                                                                      | 4/89 (4%)      |
| Fc-Gamma Receptor-Mediated Phagocytosis In Macrophages And Monocytes | 1,32E-02       | <i>Rps6kb1, Actr2, Actb, Rab11a</i>                                                                   | 4/90 (4%)      |
| Cntf Signaling                                                       | 1,51E-02       | <i>Rps6kb1, Rras2, Pik3r4</i>                                                                         | 3/52 (6%)      |
| Glioblastoma Multiforme Signaling                                    | 1,78E-02       | <i>Rps6kb1, Rb1, Rras2, E2f5, Pik3r4</i>                                                              | 5/151 (3%)     |
| Glioma Signaling                                                     | 1,82E-02       | <i>Rb1, Rras2, E2f5, Pik3r4</i>                                                                       | 4/105 (4%)     |
| Cell Cycle: G1/S Checkpoint Regulation                               | 1,86E-02       | <i>Rb1, Hdac3, E2f5</i>                                                                               | 3/58 (5%)      |
| Role Of Brca1 In Dna Damage Response                                 | 1,95E-02       | <i>Rb1, E2f5, Rfc1</i>                                                                                | 3/55 (5%)      |
| Tight Junction Signaling                                             | 2,09E-02       | <i>Cldn1, Ppp2r4, Actb, Tnfrsf11b, Oc</i>                                                             | 5/153 (3%)     |
| Pancreatic Adenocarcinoma Signaling                                  | 2,24E-02       | <i>Rb1, E2f5, Hbegf, Pik3r4</i>                                                                       | 4/108 (4%)     |
| Rac Signaling                                                        | 2,24E-02       | <i>Rps6kb1, Actr2, Rras2, Pik3r4</i>                                                                  | 4/113 (4%)     |
| Propanoate Metabolism                                                | 3,02E-02       | <i>Acat2, Acss2, Acadm</i>                                                                            | 3/65 (5%)      |
| Nrf2-Mediated Oxidative Stress Response                              | 3,02E-02       | <i>Sod2, Rras2, Actb, Pik3r4, Ep300</i>                                                               | 5/176 (3%)     |
| Non-Small Cell Lung Cancer Signaling                                 | 3,24E-02       | <i>Rb1, Rras2, Pik3r4</i>                                                                             | 3/73 (4%)      |
| Il-4 Signaling                                                       | 3,24E-02       | <i>Rps6kb1, Rras2, Pik3r4</i>                                                                         | 3/68 (4%)      |
| Erythropoietin Signaling                                             | 3,39E-02       | <i>Rps6kb1, Rras2, Pik3r4</i>                                                                         | 3/72 (4%)      |
| Renal Cell Carcinoma Signaling                                       | 3,47E-02       | <i>Rras2, Pik3r4, Ep300</i>                                                                           | 3/70 (4%)      |
| Erk/Mapk Signaling                                                   | 3,47E-02       | <i>Dusp9, Rras2, Ppp2r4, Hspb7, Pik3r4</i>                                                            | 5/184 (3%)     |

|                                                       |                |                                                                                                     |                |
|-------------------------------------------------------|----------------|-----------------------------------------------------------------------------------------------------|----------------|
| Prolactin Signaling                                   | 3,63E-02       | <i>Rras2, Pik3r4, Ep300</i>                                                                         | 3/73 (4%)      |
| P70s6k Signaling                                      | 3,63E-02       | <i>Rps6kb1, Rras2, Ppp2r4, Pik3r4</i>                                                               | 4/123 (3%)     |
| Methionine Metabolism                                 | 3,89E-02       | <i>Sms, Mat2b</i>                                                                                   | 2/30 (7%)      |
| Flt3 Signaling In Hematopoietic Progenitor Cells      | 4,17E-02       | <i>Rps6kb1, Rras2, Pik3r4</i>                                                                       | 3/75 (4%)      |
| Ovarian Cancer Signaling                              | 4,47E-02       | <i>Rps6kb1, Rb1, Rras2, Pik3r4</i>                                                                  | 4/133 (3%)     |
| Integrin Signaling                                    | 4,47E-02       | <i>Rap2b, Actr2, Rras2, Actb, Pik3r4</i>                                                            | 5/195 (3%)     |
| Role Of Chk Proteins In Cell Cycle Checkpoint Control | 4,57E-02       | <i>E2f5, Rfc1</i>                                                                                   | 2/33 (6%)      |
| Pyruvate Metabolism                                   | 4,57E-02       | <i>Pdha1 (Includes Eg:5160), Acat2, Acss2</i>                                                       | 3/77 (4%)      |
| Ampk Signaling                                        | 4,68E-02       | <i>Rps6kb1, Ppp2r4, Pik3r4, Pfkfb2</i>                                                              | 4/136 (3%)     |
| Acute Myeloid Leukemia Signaling                      | 4,79E-02       | <i>Rps6kb1, Rras2, Pik3r4</i>                                                                       | 3/79 (4%)      |
| Selenoamino Acid Metabolism                           | 4,79E-02       | <i>Acss2, Mat2b</i>                                                                                 | 2/34 (6%)      |
| Regulation Of Actin-Based Motility By Rho             | 4,90E-02       | <i>Actr2, Actb, Pfn2</i>                                                                            | 3/80 (4%)      |
| <b>Mir-34 Family</b>                                  | <b>P-Value</b> | <b>Target Genes</b>                                                                                 | <b>Overlap</b> |
| Cardiac Beta-Adrenergic Signaling                     | 6,31E-03       | <i>Ppp1cc, Prkar2b, Adrbk1, Ppp2r4, Mras, Akap6, Pkia, Ppp2r5a</i>                                  | 8/121 (7%)     |
| Ampk Signaling                                        | 1,10E-02       | <i>Prkar2b, Acacb, Pfkfb4, Ppp2r4, Ppm1b, Mras, Lipe, Ppp2r5a</i>                                   | 8/136 (6%)     |
| Notch Signaling                                       | 1,12E-02       | <i>Dll1, Jag1, Notch1, Hey1</i>                                                                     | 4/40 (10%)     |
| Myc Mediated Apoptosis Signaling                      | 1,35E-02       | <i>Ywhag, Mras, Mapk9, Bid, Bax</i>                                                                 | 5/62 (8%)      |
| Mtor Signaling                                        | 1,35E-02       | <i>Rhoq, Ppp2r4, Mras, Fkbp1a, Rps6ka4, Rps6ka5, Eif4e, Ppp2r5a</i>                                 | 8/141 (6%)     |
| Erk5 Signaling                                        | 1,45E-02       | <i>Ywhag, Mras, Rps6ka4, Rps6ka5, Map3k3</i>                                                        | 5/64 (8%)      |
| Tumoricidal Function Of Hepatic Natural Killer Cells  | 1,74E-02       | <i>Prf1, Bid, Bax</i>                                                                               | 3/24 (13%)     |
| Erk/Mapk Signaling                                    | 2,04E-02       | <i>Ppp1cc, Ywhag, Prkar2b, Ppp2r4, Mras, Rps6ka4, Rps6ka5, Eif4e, Ppp2r5a</i>                       | 9/184 (5%)     |
| Molecular Mechanisms Of Cancer                        | 2,29E-02       | <i>Mapk9, Cdkn2c, Bax, Prkar2b, Rhoq, Nf1, Sufu, Rasgrp1, Mras, Bid, Notch1, E2f2, Rap2a, Wnt5a</i> | 14/347 (4%)    |
| Dopamine Receptor Signaling                           | 2,57E-02       | <i>Ppp1cc, Prkar2b, Ppp2r4, Ppp2r5a, Caly</i>                                                       | 5/72 (7%)      |
| Sonic Hedgehog Signaling                              | 2,63E-02       | <i>Prkar2b, Adrbk1, Sufu</i>                                                                        | 3/29 (10%)     |
| Semaphorin Signaling In Neurons                       | 3,02E-02       | <i>Met, Sema3a, Rhoq, Arhgap1</i>                                                                   | 4/51 (8%)      |
| Wnt/Beta-Catenin Signaling                            | 3,55E-02       | <i>Cdh3, Ppp2r4, Sox12, Sfrp1, Pin1, Rarg, Ppp2r5a, Wnt5a</i>                                       | 8/163 (5%)     |
| Cell Cycle Regulation By Btg Family Proteins          | 4,37E-02       | <i>Ppp2r4, E2f2, Ppp2r5a</i>                                                                        | 3/34 (9%)      |
| Cdk5 Signaling                                        | 4,79E-02       | <i>Ppp1cc, Prkar2b, Ppp2r4, Mras, Ppp2r5a</i>                                                       | 5/86 (6%)      |
| Actin Cytoskeleton Signaling                          | 4,90E-02       | <i>Ppp1cc, Pip5k1a, Vav3, Fgf9, Mras, Rdx, Myh9, Wasf1, Pdgfc</i>                                   | 9/218 (4%)     |
