# Supplementary material for: MicroRNA Expression Profiling Reveals MiRNA Families Regulating Specific Biological Pathways in Mouse Frontal Cortex and Hippocampus
Source: PLoS One. 2011 Jun 22;6(6):e21495. doi: 10.1371/journal.pone.0021495 (PMC3120887; doi:10.1371/journal.pone.0021495)
Supplement: Table S1 — MiRNAs differentially expressed between frontal cortex and hippocampus. Differentially expressed (P<0.05) miRNAs between frontal cortex and hippocampus. FCx = frontal cortex, Chr = chromosome, Start = start position of the sequence in genomic alignment, End = end position of the sequence in genomic alignment, AS = antisense, S = sense, MS = miRNA-Seq, MA = microarray. MiRNA-Seq count concentration refers to normalized expression levels from edgeR. (XLSX) [file pone.0021495.s003.xlsx]

## Sheet: Sheet1
Table S1. MiRNAs differentially expressed between frontal cortex and hippocampus. Differentially expressed (P<0.05) miRNAs between frontal cortex and hippocampus. FCx = frontal cortex, Chr = chromosome, Start = start position of the sequence in genomic alignment, End = end position of the sequence in genomic alignment, AS = antisense, S = sense, MS = miRNA-Seq, MA = microarray. MiRNA-Seq count co…
miRNAs over- expressed in FCx	miR-Family	Mature Sequence	Chr	Start	End	Strand	Detected by	Expression level in FCx by MA	Expression level in HP by MA	MiRNA-Seq FCx count concentration	MiRNA-Seq HP count concentration	Fold change	p-value	Cluster #
mmu-miR-30a*	miR-30	cuuucagucggauguuugcag	1	23279108	23279178	S	MA	5.08138	4.24103			1.79	3.5E-02
mmu-miR-128	miR-128	ucacagugaaccggucucuu	1; 9	130098932; 112021136	130099013; 112021219	S; AS	MA	11.116	10.1564			1.94	3.8E-03
mmu-miR-467b*	miR-467	auauacauacacacaccaaca	2	10402875	10402947	S	MA	3.86473	2.47882			2.61	1.8E-03
mmu-miR-129-3p	miR-129	aagcccuuaccccaaaaagca	2	94081521	94081610	AS	MA	7.68793	7.02562			1.58	4.0E-02
mmu-miR-129-5p	miR-129	cuuuuugcggucugggcuug	2; 6	94081521; 28972619	94081610; 28972691	AS; S	MA	5.977	4.94597			2.04	2.6E-02
mmu-miR-674*	miR-674	cacagcucccaucucagaaca	2	117010863	117010962	S	MA	6.20838	5.40359			1.75	2.6E-02
mmu-miR-34a	miR-34	uggcagugucuuagcugguug	4	149442563	149442664	S	MA	7.53749	5.88367			3.15	1.1E-03
mmu-miR-429	miR-8	uaauacugucugguaaugccg	4	155428014	155428096	AS	MA; MS	3.5714	2.05339	0.000746179	2.31888e-05	2.86; 32.16	5.3E-03; 1.1E-08	1
mmu-miR-200a	miR-8	uaacacugucugguaacgaug	4	155429005	155429094	AS	MA; MS	3.44665	1.56367	0.0013579	2.57927e-05	3.69; 52.59	1.3E-02; 2.6E-10	1
mmu-miR-200a*	miR-8	caucuuaccggacagugcugg	4	155429005	155429094	AS	MS			1.03993e-05	3.1759e-07	32.86	4.3E-05	1
mmu-miR-200b	miR-8	uaauacugccugguaaugaug	4	155429790	155429859	AS	MA; MS	2.53351	1.22119	0.000841803	2.61647e-05	2.48; 32.19	5.0-E03; 1.1E-08	1
mmu-miR-200b*	miR-8	caucuuacugggcagcauugg	4	155429790	155429859	AS	MS			3.45582e-05	8.20227e-07	42.85	1.1E-07	1
mmu-miR-592	miR-592	auugugucaauaugcgaugaug	6	27886655	27886750	AS	MA	2.51762	1.05958			2.75	1.4E-02
mmu-miR-182	miR-182	uuuggcaaugguagaacucacacc	6	30115918	30115992	AS	MA; MS	5.46502	1.81201	5.38378e-05	5.09104e-07	12.58; 103.93	3.5E-04; 1.3E-09	2
mmu-miR-96	miR-96	uuuggcacuagcacauuuuugc	6	30119446	30119551	AS	MS			8.74091e-06	8.7835e-16	FCx only	1.8E-05	2
mmu-miR-183	miR-183	uauggcacugguagaauucac	6	30119668	30119737	AS	MS			5.1025e-05	1.47113e-07	336.12	4.9E-11	2
mmu-miR-335-5p	miR-335	ucaagagcaauaacgaaaaaug	6	30691299	30691396	S	MA	3.59753	1.99694			3.03	1.8E-02
mmu-miR-490	miR-490	caaccuggaggacuccaugcu	6	36371742	36371825	S	MA; MS	3.37222	2.32173	3.4288e-05	1.12082e-05	2.07; 3.08	2.1E-02; 4.3E-02
mmu-miR-141	miR-8	uaacacugucugguaaagaug	6	124667932	124668003	AS	MS			4.1642e-05	3.63157e-07	118.58	8.2E-09	3
mmu-miR-200c	miR-8	uaauacugccggguaaugaugg	6	124668340	124668408	AS	MA; MS	4.18936	0.951733	0.000140921	5.43859e-07	9.43; 263.86	5.6E-03; 7.8E-13	3
mmu-miR-344	miR-344	ugaucuagccaaagccugacug	7	69022656/ 69084913	69022750/ 69084992	AS	MA	7.31993	6.86049			1.38	4.8E-02
mmu-miR-139-3p	miR-139	uggagacgcggcccuguugga	7	108623890	108623957	S	MS			0.000204689	7.23973e-05	2.82	4.9E-02
mmu-miR-383	miR-383	agaucagaaggugacuguggc	8	39315185	39315258	AS	MA; MS	8.13066	7.12659	0.00302035	0.000877156	2.01; 3.44	4.4E-03; 1.9E-02
mmu-miR-24-2*	miR-24	gugccuacugagcugaaacag	8	86732714	86732820	S	MA	5.33841	4.28698			2.07	2.3E-02
mmu-miR-135a*	miR-135	uauagggauuggagccguggc	9	106056455	106056544	S	MS			9.62653e-06	1.33132e-06	7.46	5.5E-03
mmu-miR-146a	miR-146	ugagaacugaauuccaugggu	11	43187899	43187963	AS	MA	5.11073	3.90503			2.31	2.0E-03
mmu-miR-212	miR-132	uaacagucuccagucacggcc	11	74986890	74986980	S	MA; MS	8.90903	8.27739	0.000453735	0.000139878	1.55; 3.24	1.3E-02; 2.6E-02	4
mmu-miR-132	miR-132	uaacagucuacagccaugguc	11	74987167	74987267	S	MA; MS	11.7144	10.7143	0.0134218	0.00356012	2.00; 3.77	1.8E-03; 1.2E-02	4
mmu-miR-665	miR-665	accaggaggcugagguccc	12	110824524	110824617	S	MA	6.285	5.73662			1.46	1.7E-02
mmu-miR-494	miR-154	ugaaacauacacgggaaaccu	12	110953528	110953612	S	MA	5.92481	5.09013			1.78	1.4E-02
mmu-miR-495	miR-329	aaacaaacauggugcacuucu	12	110956957	110957036	S	MA	4.8914	4.00884			1.84	4.6E-03
mmu-let-7d*	let-7	cuauacgaccugcugccuuuc	13	48631381	48631483	AS	MS			0.000141171	1.71983e-05	8.20	1.8E-04
mmu-let-7b*	let-7	cuauacaaccuacugccuucc	15	85537749	85537833	S	MS			0.000504462	0.000131738	3.82	1.2E-02
mmu-miR-193b	miR-193	aacuggcccacaaagucccgc	16	13449616	13449694	S	MA	7.52939	5.24038			4.89	1.7E-05
mmu-miR-301b	miR-130	cagugcaaugguauugucaaag	16	17124493	17124589	AS	MS			1.99151e-06	1.47113e-07	13.73	2.7E-02
mmu-miR-1224	miR-1224	gugaggacuggggaggugga	16	20604525	20604609	S	MS			0.000476907	6.0467e-05	7.89	1.9E-04
mmu-miR-145	miR-145	guccaguuuucccaggaauccc	18	61807470	61807557	AS	MA	9.24058	8.73187			1.42	4.2E-02
mmu-miR-146b	miR-146	ugagaacugaauuccauaggc	19	46417252	46417360	S	MA	3.73252	3.03278			1.62	2.0E-02
mmu-miR-384-5p	miR-384	uguaaacaauuccuaggcaaug	X	102539621	102539708	AS	MA	3.09581	2.34963			1.68	3.7E-02
miRNAs overexpressed in HP	miR-Family	Mature Sequence	Chr	Start	End	Strand	Detected by	Expression level in FCx by MA	Expression level in HP by MA	MiRNA-Seq FCx count concentration	MiRNA-Seq HP count concentration	Fold change	p-value	Cluster #
mmu-miR-375	miR-375	uuuguucguucggcucgcgug	1	74947226	74947300	AS	MA	1.93782	2.90303			1.95	1.2E-02
mmu-miR-488*	miR-488	cccagauaauagcacucuca	1	160435756	160435864	S	MS			8.7835e-16	1.07402e-06	HP only	4.1E-02
mmu-miR-467c	miR-467	uaagugcgugcauguauaugu	2	10395558	10395654	S	MS			1.22788e-06	6.4479e-06	5.20	1.8E-02
mmu-miR-130a	miR-130	cagugcaauguuaaaagggca	2	84581272	84581335	AS	MA	5.54299	6.24529			1.63	1.1E-02
mmu-miR-551b	miR-551	gcgacccauacuugguuuca	3	29315745	29315842	S	MA	4.10215	6.24663			4.42	2.4E-04
mmu-miR-92b	miR-25	uauugcacucgucccggccuc	3	89031038	89031120	AS	MA	6.52673	7.26175			1.66	4.4E-03
mmu-miR-491	miR-491	aguggggaacccuuccaugag	4	87767944	87768029	S	MA	5.71815	6.30837			1.51	3.1E-02
mmu-miR-101a*	miR-101	ucaguuaucacagugcugaug	4	101019550	101019632	AS	MS			8.7835e-16	1.07715e-06	HP only	4.1E-02
mmu-miR-29b*	miR-29	gcugguuucauauggugguuu	6	31013017	31013097	AS	MS			8.7835e-16	1.98539e-06	HP only	4.9E-02
mmu-miR-330*	miR-330	gcaaagcacagggccugcagag	7	19766814	19766911	S	MA	7.63723	8.19766			1.47	3.9E-02
mmu-miR-7a	miR-7	uggaagacuagugauuuuguug	7	86033163	86033259	S	MS			0.000148443	0.000555717	3.76	1.4E-02
mmu-miR-762	miR-762	ggggcuggggccgggacagag	7	134852001	134852076	S	MA	3.8486	5.2506			2.64	1.2E-02
mmu-miR-34c	miR-34	aggcaguguaguuagcugauug	9	50911139	50911215	AS	MA; MS	4.12428	7.20107	4.05186e-05	0.000141771	8.44; 3.49	1.3E-03; 2.0E-02	5
mmu-miR-34c*	miR-34	aaucacuaaccacacagccag	9	50911139	50911215	AS	MA	3.30345	6.0041			6.50	4.1E-04	5
mmu-miR-34b-3p	miR-34	aaucacuaacuccacugccau	9	50911667	50911750	AS	MA; MS	2.76368	4.87102	2.30009e-06	1.49144e-05	4.31; 6.59	7.3E-03; 5.6E-03	5
mmu-miR-34b-5p	miR-34	aggcaguguaauuagcugauug	9	50911667	50911750	AS	MS			1.55175e-06	1.60699e-05	9.77	3.1E-04	5
mmu-miR-425*	miR-425	aucgggaaugucguguccgc	9	108471108	108471192	S	MA; MS	2.38701	3.85326	6.15607e-06	1.78029e-05	2.76; 2.76	7.2E-03; 4.7E-02
mmu-miR-218-2*	miR-218	caugguucugucaagcaccgc	11	35430318	35430427	S	MA; MS	2.7324	3.44202	2.81641e-06	9.2832e-06	1.64; 3.14	6.9E-03; 3.7E-02
mmu-miR-804	nd	ugugaguuguuccucaccugg	11	50171287	50171381	AS	MA	1.15018	1.94412			1.73	1.5E-02
mmu-miR-324-5p	miR-324	cgcauccccuagggcauuggug	11	69825545	69825633	S	MA	6.95722	7.56069			1.52	1.6E-02
mmu-miR-423-5p	miR-423	ugaggggcagagagcgagacuu	11	76891566	76891674	AS	MA	3.11807	4.05014			1.91	3.5E-02
mmu-miR-21	miR-21	uagcuuaucagacugauguug	11	86397569	86397660	AS	MA	1.42596	2.39833			1.96	1.4E-02
mmu-miR-770-3p	miR-770	cgugggccugacguggagcug	12	110801902	110801995	S	MA	5.65596	6.30379			1.57	3.5E-02
mmu-miR-370	miR-370	gccugcugggguggaaccugg	12	110856468	110856546	S	MA	6.05917	6.56085			1.42	3.7E-02
mmu-miR-666-3p	miR-666	ggcugcagcgugaucgccugc	12	110955295	110955393	S	MA	3.06861	3.69284			1.54	4.9E-02
mmu-miR-666-5p	miR-666	agcgggcacagcugugagagc	12	110955295	110955393	S	MA	3.4819	5.14568			3.17	1.7E-02
mmu-miR-376a*	miR-368	gguagauucuccuucuaugag	12	110961984	110962065	S	MS			1.87836e-06	7.8476e-06	4.29	3.7E-02
mmu-miR-874	miR-874	cugcccuggcccgagggaccg	13	58124486	58124561	AS	MA	5.8166	6.61776			1.74	1.2E-02
mmu-miR-7a	miR-7	uggaagacuagugauuuuguug	13	58494140	58494247	AS	MS			0.000148443	0.000555717	3.76	1.4E-02
mmu-miR-24-1*	miR-24	gugccuacugagcugauaucag	13	63402516	63402583	S	MS			1.91528e-06	6.85151e-06	3.48	4.6E-02
mmu-miR-449b	miR-449	aggcaguguuguuagcugg	13	113827627	113827706	S	MS			6.88812e-07	3.78902e-06	5.29	2.2E-02
mmu-miR-17	miR-17	caaagugcuuacagugcaggua	14	115442893	115442976	S	MS			8.7835e-16	2.32468e-06	HP only	2.6E-02
mmu-miR-17*	miR-17	acugcagugagggcacuugua	14	115442893	115442976	S	MA	3.24839	4.42269			2.26	2.4E-03
mmu-miR-99a	miR-99	aacccguagauccgaucuugu	16	77599181	77599245	S	MA	8.21872	8.98624			1.70	5.5E-03
mmu-miR-877	miR-877	guagaggagauggcgcagg	17	36097675	36097759	AS	MA	2.50799	3.29996			1.73	4.9E-02
mmu-miR-7b	miR-7	uggaagacuugugauuuuguug	17	56382411	56382521	S	MS			7.51771e-05	0.00022617	3.00	3.7E-02
mmu-miR-204	miR-204	uucccuuugucauccuaugcc	19	22825095	22825162	S	MA	2.04924	3.82413			3.42	1.0E-02
mmu-miR-676	miR-676	ccguccugagguuguugagc	X	97576436	97576524	S	MA	6.55584	7.0097			1.37	4.6E-02
mmu-miR-672	miR-672	ugagguugguguacugugugug	X	101311514	101311613	AS	MA	5.66952	6.50946			1.79	4.1E-02
mmu-miR-448	miR-448	uugcauauguaggauguccca	X	143592753	143592864	S	MS			3.6748e-06	1.3323e-05	3.45	2.2E-02
