# Supplementary material for: MicroRNA Expression Profiling Reveals MiRNA Families Regulating Specific Biological Pathways in Mouse Frontal Cortex and Hippocampus
Source: PLoS One. 2011 Jun 22;6(6):e21495. doi: 10.1371/journal.pone.0021495 (PMC3120887; doi:10.1371/journal.pone.0021495)
Supplement: Table S3 — MiRNA expression levels detected by miRNA-Seq. ConcFCx and ConcHP are the normalized expression levels from edgeR for Frontal Cortex (FCx) and Hippocampus (HP). LogFC is the log-transformed fold change of HP over FCx. P-value is calculated by edgeR and is analogous to a p-value from the Fisher's Exact Test. BenjHoch-PVal is the p-value after multiple testing correction using the Benjamini-Hochberg method. Lane values are expression levels normalized to the geometric mean of each library by edgeR. (XLSX) [file pone.0021495.s005.xlsx]

## Sheet: miRNA-Seq
Supplemental Table S3. MiRNA expression levels detected by miRNA-Seq. ConcFCx and ConcHP are the normalized expression levels from edgeR for Frontal Cortex (FCx) and Hippocampus (HP). LogFC is the log-transformed fold change of HP over FCx. P-value is calculated by edgeR and is analogous to Fisher's Exact Test. BenjHoch-PVal is the p-value after multiple testing correction using the Benjamini -Ho…
miRNA	ConcFCx	ConcHP	logFC	p-value	BenjHoch-PVal	Lane1: FCx library with Index 3	Lane2: FCx library with Index 7	Lane3: FCx library with Index 11	Lane4: FCx library with Index 3	Lane4: FCx library with Index 7	Lane4: FCx library with Index 11	Lane5: HP library with Index 3	Lane6: HP library with Index 7	Lane7: HP library with Index 11	Lane8: HP library with Index 3	Lane8: HP library with Index 7	Lane8: HP library with Index 11
mmu-miR-200c	0.000140921	5.43859e-07	-8.04362	7.81e-13	3.22e-10	111.97	50.8781	140.521	140.163	36.6176	186.349	0	0	0.480754	1.43283	0.934608	0
mmu-miR-183	5.1025e-05	1.47113e-07	-8.39282	4.88e-11	1.01e-08	28.9976	48.9673	33.2418	40.545	43.8831	45.667	0	0.681167	0	0	0	0
mmu-miR-200a	0.0013579	2.57927e-05	-5.71669	2.64e-10	3.63e-08	284.348	2416.71	459.631	255.298	2529.82	446.01	4.0714	49.1241	6.80817	7.30972	45.5735	8.35744
mmu-miR-182	5.38378e-05	5.09104e-07	-6.69941	1.28e-09	1.32e-07	43.1551	60.4924	45.8235	1.05077	59.6989	40.8556	0	1.53045	0	0	0.94572	0
mmu-miR-141	4.1642e-05	3.63157e-07	-6.88969	8.24e-09	6.65e-07	0.358909	76.8308	6.47008	14.6835	74.2416	21.0174	0	0	0	0	2.23586	0
mmu-miR-200b	0.000841803	2.61647e-05	-5.00846	1.12e-08	6.65e-07	1504.36	231.385	323.831	1320.29	268.16	319.541	43.3561	8.72154	6.5473	46.5185	8.22264	9.89051
mmu-miR-429	0.000746179	2.31888e-05	-5.00709	1.13e-08	6.65e-07	66.4377	1458.49	131.215	108.387	1597.51	147.747	1.00477	39.6354	2.91399	1.26327	59.0383	5.29381
mmu-miR-200b*	3.45582e-05	8.20227e-07	-5.42131	1.14e-07	5.85e-06	1504.36	231.385	323.831	1320.29	268.16	319.541	43.3561	8.72154	6.5473	46.5185	8.22264	9.89051
mmu-miR-96	8.74091e-06	8.7835e-16	-33.2789	1.83e-05	0.000838475	0.296547	12.4903	4.83544	0.720747	18.1596	0.562413	0	0	0	0	0	0
mmu-miR-200a*	1.03993e-05	3.1759e-07	-5.03846	4.28e-05	0.00176319	284.348	2416.71	459.631	255.298	2529.82	446.01	4.0714	49.1241	6.80817	7.30972	45.5735	8.35744
mmu-let-7d*	0.000141171	1.71983e-05	-3.0362	0.000181186	0.00638499	109.121	79.6851	105.851	127.068	118.223	126.56	6.40315	15.3107	11.8333	18.16	17.619	11.4438
mmu-miR-1224	0.000476907	6.0467e-05	-2.97978	0.000185971	0.00638499	324.227	540.566	210.134	301.356	640.97	228.398	34.1649	77.3146	15.8802	40.9558	106.315	9.88192
mmu-miR-34b-5p	1.55175e-06	1.60699e-05	3.28774	0.000312177	0.00989362	0.148431	4.82936	0.0603479	0.272526	0.0250532	0.233198	13.8315	8.01713	13.7005	16.1353	10.0386	13.7578
mmu-miR-135a*	9.62653e-06	1.33132e-06	-2.89845	0.00553553	0.154437	8.68215	15.3743	3.28933	0.746053	13.3636	0.579161	1.11601	0.912843	0	0	4.40525	0
mmu-miR-34b-3p	2.30009e-06	1.49144e-05	2.71935	0.0056227	0.154437	5.04389	0	4.54618	0.359895	0.0292095	0.302441	10.713	3.26711	10.0138	28.3898	1.17817	16.8481
mmu-let-7b*	0.000504462	0.000131738	-1.93214	0.0118818	0.292802	29.1455	40.3157	15.9291	2244.47	40.2732	11.0485	26.4049	33.9432	6.81354	506.021	31.0993	16.7673
mmu-miR-132	0.0134218	0.00356012	-1.91453	0.0120816	0.292802	12463.2	564.557	17436.7	14897.2	586.229	17267.7	2253.52	190.565	5185.51	4065.02	210.681	4861.88
mmu-miR-7a	0.000148443	0.000555717	1.90956	0.0135052	0.30912	240.174	79.6847	33.3145	238.444	53.6742	56.5846	971.879	318.784	103.768	849.662	279.813	93.2705
mmu-miR-467c	1.22788e-06	6.4479e-06	2.37834	0.0175637	0.380855	0.128113	0	4.32015	0.227957	0.0224626	0.196872	7.35976	1.54633	2.16337	15.6988	0.741588	3.01471
mmu-miR-383	0.00302035	0.000877156	-1.78382	0.0189229	0.389813	1984.28	2284.19	2966.92	1830.58	2181.42	2978.32	468.937	853.827	709.331	546.383	856.945	695.402
mmu-miR-34c	4.05186e-05	0.000141771	1.80403	0.0202115	0.39653	45.7313	47.051	3.30561	40.0539	43.8596	11.1267	89.6352	189.418	18.4668	133.075	219.363	17.5324
mmu-miR-449b	6.88812e-07	3.78902e-06	2.40447	0.0216419	0.400308	0.0847724	1.9342	0.0374998	0.14165	0.0161875	0.124552	1.81392	4.78571	0	2.65123	8.69813	0
mmu-miR-448	3.6748e-06	1.3323e-05	1.78518	0.0223473	0.400308	0.228195	6.73503	3.19269	0.480873	3.6585	0.394149	13.0955	12.6082	7.12458	12.0876	9.17271	8.38062
mmu-miR-212	0.000453735	0.000139878	-1.69674	0.0257206	0.420596	329.923	96.964	566.771	361.053	158.48	626.132	77.2929	73.8321	141.063	116.928	111.749	137.709
mmu-miR-17	8.7835e-16	2.32468e-06	31.3033	0.0260776	0.420596	1.41138e-10	0	7.03895e-11	2.11325e-10	3.24541e-11	1.91427e-10	4.0222	0.842736	1.7477	3.41335	0.769553	0
mmu-miR-301b	1.99151e-06	1.47113e-07	-3.77914	0.0265425	0.420596	0.171229	1.91902	0.0676217	0.326186	4.76841	0.276029	0	0.681167	0	0	0	0
mmu-miR-376a*	1.87836e-06	7.8476e-06	2.10015	0.0368114	0.532544	4.86057	0	3.05888	0.313053	0.0271151	0.265637	4.1253	0.314674	12.9493	6.01873	0	13.8607
mmu-miR-218-2*	2.81641e-06	9.2832e-06	1.6517	0.0369588	0.532544	0.203689	3.8456	0.0772547	0.410299	5.99684	0.341228	2.93378	13.7961	1.36392	3.96356	21.5219	0
mmu-miR-7b	7.51771e-05	0.00022617	1.58462	0.0374849	0.532544	97.1698	103.705	11.2089	67.0028	73.119	0.782821	264.63	253.907	22.359	254.761	240.341	29.0077
mmu-miR-101a*	8.7835e-16	1.07715e-06	30.1007	0.0406125	0.539754	1.41138e-10	0	7.03895e-11	2.11325e-10	3.24541e-11	1.91427e-10	0	0	0	0	1.3439	4.84545
mmu-miR-488*	8.7835e-16	1.07402e-06	30.1638	0.0406125	0.539754	1.41138e-10	0	7.03895e-11	2.11325e-10	3.24541e-11	1.91427e-10	0	0	1.65771	1.35655	0.836275	1.54962
mmu-miR-490	3.4288e-05	1.12082e-05	-1.62206	0.042913	0.552504	25.9887	23.9988	48.8134	14.5746	26.8296	20.869	6.44401	11.3952	9.28484	5.31146	10.1036	9.93553
mmu-miR-24-1*	1.91528e-06	6.85151e-06	1.79887	0.0461818	0.558306	0.167608	0	4.48382	0.317386	2.42441	0.269072	9.35175	0.314158	4.84123	8.0938	0	9.99695
mmu-miR-425*	6.15607e-06	1.78029e-05	1.46282	0.0470046	0.558306	0.271657	5.75985	0.0950126	0.624792	18.0646	0.497199	4.07557	29.4644	2.39625	7.99607	35.9681	3.76398
mmu-miR-139-3p	0.000204689	7.23973e-05	-1.4943	0.0489908	0.558306	286.279	12.4717	105.906	364.719	31.7447	167.163	49.5983	12.9082	63.491	131.891	19.6593	63.488
mmu-miR-29b*	8.7835e-16	1.98539e-06	31.0882	0.0490848	0.558306	1.41138e-10	0	7.03895e-11	2.11325e-10	3.24541e-11	1.91427e-10	2.34226	2.54394	0.632165	1.30558	2.21615	0
mmu-miR-423-5p	0.000545538	0.000198342	-1.459	0.0531275	0.558306	564.748	215.064	388.5	560.741	361.972	480.551	166.326	122.103	113.953	230.571	195.425	105.531
mmu-miR-551b	6.00414e-06	1.64018e-05	1.37763	0.0552737	0.558306	0.269725	8.64934	0.0945482	0.617798	14.4723	0.492338	1.76506	28.5086	0.85296	5.29716	34.6769	6.06572
mmu-miR-296-5p	1.43506e-06	4.86181e-06	1.69944	0.0564356	0.558306	0.141506	0	0.0580497	0.257011	4.71444	0.22063	3.39474	0.557146	2.73189	10.2544	3.00039	3.02684
mmu-miR-483	6.80901e-06	1.84597e-06	-1.83877	0.0605245	0.558306	5.85218	6.7209	0.0968149	16.5908	3.69334	0.51656	1.92675	1.42199	0	2.73681	2.72715	0
mmu-miR-376b*	1.04022e-05	2.95871e-05	1.48633	0.0608257	0.558306	8.72841	13.4479	4.85179	0.765903	9.75405	10.1841	7.15506	56.5515	4.72684	15.396	53.0658	2.23511
mmu-miR-184	2.37994e-05	8.30085e-06	-1.53815	0.0610336	0.558306	17.4081	38.4193	0.111005	14.2597	38.9212	0.703539	5.70048	12.3077	1.88708	3.28938	15.6605	0
mmu-miR-199b*	8.7835e-16	9.79177e-07	30.039	0.0636902	0.558306	1.41138e-10	0	7.03895e-11	2.11325e-10	3.24541e-11	1.91427e-10	2.11403	0	0.713765	2.10869	0	0
mmu-miR-215	8.7835e-16	9.85385e-07	30.0415	0.0636902	0.558306	1.41138e-10	0	7.03895e-11	2.11325e-10	3.24541e-11	1.91427e-10	1.1695	0.971152	0	2.85737	0	0
mmu-miR-325	8.7835e-16	9.32851e-07	29.9929	0.0636902	0.558306	1.41138e-10	0	7.03895e-11	2.11325e-10	3.24541e-11	1.91427e-10	0.722528	0.38513	1.71107	0	0	1.56091
mmu-miR-376c*	8.7835e-16	8.92869e-07	29.9634	0.0636902	0.558306	1.41138e-10	0	7.03895e-11	2.11325e-10	3.24541e-11	1.91427e-10	0	2.98582	0	0	1.38216	0
mmu-miR-378*	8.7835e-16	8.58651e-07	29.8471	0.0636902	0.558306	1.41138e-10	0	7.03895e-11	2.11325e-10	3.24541e-11	1.91427e-10	0	0.393461	1.06333	2.88853	0	0
mmu-miR-193b	5.93226e-06	1.26353e-06	-2.23331	0.0659813	0.560548	23.1074	0	0.0943219	0.614423	2.48147	0.489987	1.12443	0.921841	0	2.80492	0	1.53739
mmu-miR-130b	1.69961e-05	5.88617e-06	-1.5118	0.0666671	0.560548	19.9077	0	25.1188	19.6568	2.49367	15.3418	4.56732	1.29868	5.69831	6.054	1.62795	8.46288
mmu-miR-140	6.88812e-07	2.8551e-06	1.98528	0.0801944	0.657685	0.0847724	1.9342	0.0374998	0.14165	0.0161875	0.124552	3.09788	1.88738	1.15314	2.67828	2.14853	2.27628
mmu-miR-125b-3p	4.06053e-05	1.5711e-05	-1.38682	0.0814125	0.657685	20.437	53.7755	12.7766	1.0206	74.2358	25.8842	4.07879	21.9334	6.84072	8.67954	28.4151	3.76498
mmu-miR-299*	2.21181e-06	6.00088e-06	1.3605	0.0841066	0.662429	0.181024	3.8507	0.0706149	0.35055	3.61167	0.295156	5.36691	4.8945	0.593599	8.11906	6.17148	3.01737
mmu-miR-377	3.87503e-06	1.14269e-05	1.59929	0.0854176	0.662429	0.232959	0	9.13403	0.495397	0.0339589	8.44226	2.53778	1.28905	22.9609	4.63287	2.49708	19.9831
mmu-miR-760	0.000144346	5.8879e-05	-1.29877	0.0868232	0.662429	63.4882	198.759	33.3141	67.9686	272.866	41.4987	14.4706	83.0597	7.06031	29.5077	129.351	13.7081
mmu-miR-98	0.000661187	0.00158485	1.26154	0.0930478	0.681971	722.382	286.115	743.657	501.377	240.129	622.018	1772.29	473.354	1604.18	1406.74	444.829	1762.67
mmu-miR-872	1.11976e-05	2.60172e-05	1.15157	0.0936841	0.681971	0.311515	27.8765	0.104118	0.784344	18.21	0.604153	9.86839	53.6482	2.65642	10.68	42.4492	2.99841
mmu-miR-128	0.198746	0.083415	-1.25255	0.0943503	0.681971	147313	140056	157034	169203	137557	184871	38881.7	55176.4	87150.1	70002.1	56140.8	85507
mmu-miR-183*	1.27623e-06	8.7835e-16	-30.5152	0.102688	0.68402	28.9976	48.9673	33.2418	40.545	43.8831	45.667	0	0.681167	0	0	0	0
mmu-miR-503*	8.7835e-16	5.69661e-07	29.1637	0.102688	0.68402	1.41138e-10	0	7.03895e-11	2.11325e-10	3.24541e-11	1.91427e-10	0	0	0	3.77518	0	0
mmu-miR-670	8.7835e-16	7.25734e-07	29.5596	0.102688	0.68402	1.41138e-10	0	7.03895e-11	2.11325e-10	3.24541e-11	1.91427e-10	1.23618	0	0	2.92813	0	0
mmu-miR-677	8.7835e-16	7.54343e-07	29.7037	0.102688	0.68402	1.41138e-10	0	7.03895e-11	2.11325e-10	3.24541e-11	1.91427e-10	0	0.407603	1.09796	0	1.97047	0
mmu-miR-350	1.22788e-06	4.16585e-06	1.75679	0.106946	0.68402	0.128113	0	4.32015	0.227957	0.0224626	0.196872	3.83164	1.57352	4.99063	4.02767	1.19392	3.81674
mmu-miR-29c*	2.67437e-05	1.1052e-05	-1.25962	0.107995	0.68402	9.04684	6.71069	39.3267	14.3777	4.93233	53.4517	6.44589	4.2836	13.5725	12.7978	5.61565	9.16467
mmu-miR-218	0.00108231	0.00248081	1.19691	0.110026	0.68402	315.864	207.381	2036.6	281.966	185.296	2071.05	770.43	572.312	4478.35	797.052	538.132	4527.62
mmu-miR-674*	0.000102757	4.41183e-05	-1.21845	0.110556	0.68402	14.8367	4.79085	234.831	14.8484	0.0440247	214.88	10.234	5.98211	82.5605	14.0322	7.77113	87.3464
mmu-miR-133a	3.45663e-06	1.09684e-06	-1.56277	0.111899	0.68402	0.22264	0	7.60908	0.464278	0.03301	8.20467	0.703256	0.948549	2.31359	0	0.833803	0
mmu-miR-218-1*	2.51578e-06	5.86399e-06	1.152	0.112254	0.68402	0.193109	3.84787	0.0742038	0.381796	4.80267	0.319397	0.618957	9.10841	0.339938	1.94272	14.0397	1.47462
mmu-miR-384-3p	5.05071e-05	0.000118766	1.25819	0.114984	0.68402	65.6306	3.83033	33.2402	103.526	0.0435017	35.8814	193.157	6.98272	62.0834	226.005	5.58195	65.7506
mmu-miR-674	0.000366577	0.000161477	-1.18612	0.115588	0.68402	92.244	709.57	22.254	68.3156	793.195	36.4736	41.4275	304.956	12.2515	61.0845	326.916	13.7088
mmu-miR-130b*	9.20288e-06	3.30667e-06	-1.40132	0.117279	0.68402	19.9077	0	25.1188	19.6568	2.49367	15.3418	4.56732	1.29868	5.69831	6.054	1.62795	8.46288
mmu-miR-467b	5.7804e-06	1.56332e-05	1.50654	0.118206	0.68402	10.7768	0	6.29682	11.3325	0.0368437	0.48491	22.0872	1.29063	4.48035	39.262	0.743668	6.06692
mmu-miR-467e	2.45255e-06	6.70692e-06	1.49163	0.119537	0.68402	7.29499	0	3.11814	0.375508	0.0298479	0.314545	11.3801	1.79618	0.340042	13.6112	1.62357	3.01337
mmu-let-7a*/mmu-let-7c-2*	8.11987e-05	3.45569e-05	-1.20074	0.121378	0.685035	9.09293	5.75061	0.115822	368.057	3.7098	0.785884	8.69579	2.52685	0	149.216	3.37353	0
mmu-miR-1193	8.7835e-16	1.42199e-06	30.5889	0.139103	0.764797	1.41138e-10	0	7.03895e-11	2.11325e-10	3.24541e-11	1.91427e-10	1.10592	1.48375	0.379121	2.78204	0.806357	0
mmu-miR-345-5p	4.47943e-06	1.06252e-05	1.23121	0.139223	0.764797	8.02574	2.87508	7.71914	0.535588	0.0350832	0.434084	5.66523	3.02976	14.1287	4.63594	7.86436	14.5803
mmu-miR-879	4.6809e-06	1.58963e-06	-1.50881	0.152989	0.799884	0.24944	1.91232	3.22735	10.7128	6.0672	0.442937	4.21665	2.04119	0	0	1.27888	0
mmu-miR-150*	1.82432e-05	8.29823e-06	-1.09922	0.154638	0.799884	25.4292	0	9.58171	25.641	8.57528	20.0404	7.68683	2.03821	7.76354	13.5463	3.40071	4.54967
mmu-miR-431*	1.97598e-05	4.21074e-05	1.06835	0.156958	0.799884	14.5377	17.2808	11.1533	0.909543	31.6145	15.5333	21.4447	40.8236	15.118	39.6507	68.8619	12.1803
mmu-miR-204	2.23065e-05	4.95819e-05	1.16735	0.157746	0.799884	28.4043	1.91016	36.1231	20.2589	0.0422538	20.3701	66.7439	4.2555	40.1326	80.7713	4.25452	37.4636
mmu-miR-486	4.15099e-05	1.98012e-05	-1.06051	0.16238	0.799884	31.7178	21.1154	30.0662	40.1118	29.2742	45.2911	9.89157	15.7739	11.8063	26.9492	20.2598	8.36373
mmu-miR-487b	0.000551117	0.00113343	1.04079	0.16397	0.799884	650.618	474.311	142.263	706.881	439.953	183.059	695.395	1647.48	135.402	1074.72	1665.62	119.283
mmu-miR-296-3p	1.11006e-05	4.50419e-06	-1.34453	0.170332	0.799884	6.05718	9.59938	11.0512	0.782189	20.62	0.602758	0	5.78715	6.08055	1.9523	3.47124	3.81055
mmu-miR-144	8.7835e-16	5.59789e-07	29.2635	0.170849	0.799884	1.41138e-10	0	7.03895e-11	2.11325e-10	3.24541e-11	1.91427e-10	2.35198	0	0.476602	0	0	0
mmu-miR-450b-5p	8.7835e-16	5.69211e-07	29.2328	0.170849	0.799884	1.41138e-10	0	7.03895e-11	2.11325e-10	3.24541e-11	1.91427e-10	1.81566	0	0	1.42738	0	0
mmu-miR-542-5p	8.7835e-16	5.09104e-07	29.1479	0.170849	0.799884	1.41138e-10	0	7.03895e-11	2.11325e-10	3.24541e-11	1.91427e-10	0	1.53045	0	0	0.94572	0
mmu-miR-669d	8.7835e-16	5.61527e-07	29.2633	0.170849	0.799884	1.41138e-10	0	7.03895e-11	2.11325e-10	3.24541e-11	1.91427e-10	0	0.775838	0	0	2.07231	0
mmu-miR-709	8.7835e-16	6.05908e-07	29.3445	0.170849	0.799884	1.41138e-10	0	7.03895e-11	2.11325e-10	3.24541e-11	1.91427e-10	0	0.758859	0	1.41994	0.916909	0
mmu-miR-744*	8.7835e-16	5.68853e-07	29.265	0.170849	0.799884	1.41138e-10	0	7.03895e-11	2.11325e-10	3.24541e-11	1.91427e-10	0	0.443169	0.820224	0	0	1.60381
mmu-miR-344	0.00155399	0.000775689	-1.00213	0.178905	0.815889	1298.9	354.283	1968.91	1415.8	382.717	1900.75	421.186	245.984	1028.18	631.77	320.729	1005.3
mmu-miR-193*	7.23444e-06	1.77456e-05	1.39211	0.181662	0.815889	23.1074	0	0.0943219	0.614423	2.48147	0.489987	1.12443	0.921841	0	2.80492	0	1.53739
mmu-miR-421	7.48969e-06	1.75274e-05	1.27074	0.181695	0.815889	5.90044	4.79515	4.81741	16.9724	3.69682	0.534441	13.8118	13.5393	6.56833	22.9065	17.1668	8.36784
mmu-miR-671-5p	5.95368e-06	1.14906e-05	0.877769	0.182189	0.815889	0.269068	9.61285	0.0943898	0.615433	13.275	0.490691	1.76544	18.2966	4.50035	4.63265	23.1936	1.47026
mmu-miR-491	4.96666e-06	1.03423e-05	1.04533	0.194105	0.859062	10.5742	1.91205	4.75089	0.564517	3.67837	0.45482	13.9754	4.79523	4.51036	18.9621	3.38784	3.00309
mmu-miR-503	4.08381e-06	7.75156e-06	0.848839	0.197632	0.859062	0.237616	7.69659	0.0864982	0.509872	7.2405	0.415432	2.16127	11.3071	0.34051	6.02	16.6175	0
mmu-miR-467h	8.7835e-16	1.14431e-06	30.2689	0.202156	0.859062	1.41138e-10	0	7.03895e-11	2.11325e-10	3.24541e-11	1.91427e-10	3.00108	0.647474	0	2.08418	0	0
mmu-miR-669a	8.7835e-16	1.15772e-06	30.3262	0.202156	0.859062	1.41138e-10	0	7.03895e-11	2.11325e-10	3.24541e-11	1.91427e-10	1.59351	2.48848	0	0	1.33038	0
mmu-miR-122	5.21076e-06	1.05449e-05	0.995168	0.205823	0.859062	10.6401	4.7994	0.0917813	0.577998	6.07869	0.464396	1.76619	17.0683	0	6.67353	22.7968	1.47041
mmu-miR-425	7.82336e-06	1.59052e-05	1.00022	0.205976	0.859062	0.289135	6.71879	9.42062	0.690973	8.52135	9.76413	5.24205	15.5895	15.2933	5.97336	22.573	9.90996
mmu-miR-190b	1.66646e-06	4.00704e-06	1.28912	0.207083	0.859062	4.75187	1.92113	0.0624411	0.287228	0.0258308	0.24503	3.84093	3.42136	4.44273	1.95786	2.56597	2.25821
mmu-miR-340-3p	1.20483e-05	2.40174e-05	0.974382	0.20851	0.859062	8.80641	8.63678	21.8624	0.802222	4.92214	10.3681	6.00123	11.9739	35.1933	10.0086	15.3223	34.4829
mmu-miR-322	6.88812e-07	1.95537e-06	1.44141	0.212897	0.861592	0.0847724	1.9342	0.0374998	0.14165	0.0161875	0.124552	1.48651	2.54971	0.914083	2.72785	0	1.50967
mmu-miR-21	0.00043263	0.000822931	0.927156	0.213508	0.861592	518.715	529.046	68.0548	433.94	446.021	41.5289	904.646	896.18	109.732	987.386	864.448	113.162
mmu-miR-382*	0.000372845	0.000709458	0.931285	0.215398	0.861592	675.748	15.3525	195.907	638.712	11.0202	223.165	804.531	551.665	259.098	923.553	545.274	256.996
mmu-miR-125a-3p	1.97237e-05	1.00211e-05	-1.00204	0.222929	0.876363	8.98622	36.5042	0.109672	14.0316	30.4029	0.682784	6.06614	17.8771	1.10547	8.03973	12.3925	1.47054
mmu-miR-191	0.000450098	0.000846032	0.911929	0.223345	0.876363	547.368	146.892	363.212	520.299	140.202	404.666	268.259	1216.97	347.522	471.097	1349.21	331.207
mmu-let-7f	0.0368998	0.0686925	0.896538	0.227831	0.885403	30743.7	29056.9	32500.4	28533.7	25519.9	27432.7	66279.1	47384.3	56253.9	56491.8	43328.1	53782.3
mmu-miR-203	3.5948e-05	1.88625e-05	-0.929323	0.230404	0.885403	53.965	14.3931	42.5713	33.5287	14.6735	11.0992	22.4013	7.24814	15.5054	20.1788	9.57444	13.7449
mmu-miR-33	0.000148196	7.96366e-05	-0.90234	0.232096	0.885403	23.442	243.892	69.5982	28.2276	263.132	66.6181	11.0011	142.357	38.2191	14.0255	137.114	32.0772
mmu-miR-345-3p	3.63901e-05	6.53519e-05	0.812846	0.243822	0.921601	11.9239	82.6019	0.113311	1.00701	69.3516	0.741442	10.2307	118.367	1.8971	17.3891	157.595	2.23863
mmu-miR-99a	0.0075169	0.0135484	0.849922	0.252629	0.936337	1654.81	2184.32	13803.2	1550.74	2032.78	14176.7	2100.95	3643.46	25904.7	3590.39	3735.71	24833.3
mmu-miR-484	4.51307e-05	8.28094e-05	0.88148	0.258345	0.936337	14.7942	6.71033	86.5427	33.9695	12.2432	59.9611	13.3111	11.6713	171.327	20.7487	16.1331	156.955
mmu-miR-31	0.000133285	7.45123e-05	-0.843565	0.26321	0.936337	69.1733	203.563	34.8906	87.6131	209.537	21.314	27.1933	123.246	11.7252	30.8427	142.459	15.2374
mmu-miR-504	1.10482e-05	1.95681e-05	0.787421	0.265922	0.936337	16.7447	15.3703	3.29538	0.781014	12.1748	0.601996	7.94849	28.3909	5.77651	12.7238	30.9879	6.06217
mmu-miR-320	0.00188899	0.00107385	-0.814434	0.272875	0.936337	2376.52	597.201	1200.12	2676.33	754.4	1295.03	1060.58	747.589	435.416	1422.94	940.983	449.79
mmu-miR-874	1.7379e-05	3.2123e-05	0.885683	0.27289	0.936337	0.332849	9.5944	20.4716	13.8499	18.2723	19.9506	8.69783	18.4259	30.0644	28.2147	34.3581	31.3673
mmu-miR-153	1.32786e-05	7.12082e-06	-0.888859	0.276405	0.936337	0.320558	11.5197	9.53992	13.3848	9.77259	19.3767	2.55717	5.1124	6.72891	3.29606	3.41297	12.325
mmu-miR-467a	1.01116e-05	1.96953e-05	1.05997	0.287818	0.936337	16.6306	0	4.84939	28.4254	0.0397888	0.58746	30.2174	1.29303	8.65537	43.9148	2.05431	6.82906
mmu-miR-190	6.69661e-06	1.10553e-05	0.665627	0.291071	0.936337	5.84332	10.5726	0.0965251	0.648247	10.9034	0.513393	11.5729	11.4003	0	14.1621	15.0702	0
mmu-let-7g*	8.7835e-16	3.52589e-07	28.5499	0.294661	0.936337	1.41138e-10	0	7.03895e-11	2.11325e-10	3.24541e-11	1.91427e-10	0	0	0.550397	1.4845	0	0
mmu-miR-1197	8.7835e-16	4.00778e-07	28.8306	0.294661	0.936337	1.41138e-10	0	7.03895e-11	2.11325e-10	3.24541e-11	1.91427e-10	0	2.0546	0	0	0	0
mmu-miR-133a*	8.20521e-07	8.7835e-16	-29.7954	0.294661	0.936337	0.22264	0	7.60908	0.464278	0.03301	8.20467	0.703256	0.948549	2.31359	0	0.833803	0
mmu-miR-15b*	8.7835e-16	3.88766e-07	28.7426	0.294661	0.936337	1.41138e-10	0	7.03895e-11	2.11325e-10	3.24541e-11	1.91427e-10	0	0	0.917914	0	0.992815	0
mmu-miR-21*	8.7835e-16	4.64217e-07	29.0419	0.294661	0.936337	329.923	96.964	566.771	361.053	158.48	626.132	77.2929	73.8321	141.063	116.928	111.749	137.709
mmu-miR-33*	8.7835e-16	3.41457e-07	28.5281	0.294661	0.936337	23.442	243.892	69.5982	28.2276	263.132	66.6181	11.0011	142.357	38.2191	14.0255	137.114	32.0772
mmu-miR-467a*/mmu-miR-467d*	8.7835e-16	4.23965e-07	28.831	0.294661	0.936337	1.41138e-10	0	7.03895e-11	2.11325e-10	3.24541e-11	1.91427e-10	0	0	0.894164	1.46271	0	0
mmu-miR-467d	8.7835e-16	4.97095e-07	29.1215	0.294661	0.936337	1.41138e-10	0	7.03895e-11	2.11325e-10	3.24541e-11	1.91427e-10	0.817522	1.54138	0	0	0	0
mmu-miR-542-3p	8.7835e-16	4.06848e-07	28.7935	0.294661	0.936337	1.41138e-10	0	7.03895e-11	2.11325e-10	3.24541e-11	1.91427e-10	0	0.4935	0	0	1.58095	0
mmu-miR-592	8.7835e-16	4.18002e-07	28.8136	0.294661	0.936337	1.41138e-10	0	7.03895e-11	2.11325e-10	3.24541e-11	1.91427e-10	0	0.848806	0	1.4644	0	0
mmu-miR-879*	8.7835e-16	3.90184e-07	28.7481	0.294661	0.936337	0.24944	1.91232	3.22735	10.7128	6.0672	0.442937	4.21665	2.04119	0	0	1.27888	0
mmu-miR-206	1.14881e-05	6.00847e-06	-0.936838	0.295446	0.936337	14.1369	7.67589	6.41514	13.0901	12.179	0.608228	8.59873	6.46278	0.850996	6.05105	3.88503	2.24446
mmu-miR-27a	0.000237393	0.000402825	0.762342	0.306906	0.964713	195.091	165.14	225.8	114.694	185.255	232.582	189.725	442.922	309.25	248.633	434.004	272.323
mmu-miR-342-3p	0.000317128	0.000187723	-0.755264	0.309484	0.964713	461.11	197.784	101.203	426.237	216.95	92.0718	189.869	138.223	54.2555	264.894	183.98	52.7262
mmu-miR-30d	0.00384494	0.00228466	-0.751096	0.311424	0.964713	2549.09	5316.34	1165.44	2778.51	4992.8	1305.63	959.918	3516.97	578.772	1691.02	3482.95	530.109
mmu-miR-30b*	1.94753e-06	3.41862e-06	0.753912	0.319437	0.971412	0.169155	2.8861	0.0669781	0.321132	3.59744	0.272038	0.627729	6.48575	0	1.27841	7.80619	0
mmu-miR-720	6.47731e-05	3.81853e-05	-0.763637	0.321157	0.971412	31.9152	28.7957	85.1615	1.06716	42.6838	114.561	16.8098	18.6502	40.743	32.2423	38.301	32.8846
mmu-miR-135a	9.47699e-06	1.72232e-05	0.9052	0.322764	0.971412	16.5416	4.79327	0.101951	17.8639	6.12384	0.576485	19.2992	7.50701	15.5321	18.1597	10.4751	9.90571
mmu-miR-191*	3.50847e-06	5.48536e-06	0.564384	0.323018	0.971412	547.368	146.892	363.212	520.299	140.202	404.666	268.259	1216.97	347.522	471.097	1349.21	331.207
mmu-miR-29c	0.00694	0.00419517	-0.726067	0.327529	0.974879	11324.3	2165.12	1793.89	12037.2	1868.26	3500.01	6068.98	1636.71	942.537	8062.27	1561.02	1486.41
mmu-miR-666-3p	8.31835e-06	1.51328e-05	0.897893	0.331196	0.974879	0.293289	0	12.494	12.3292	6.11646	9.8614	2.14878	1.29036	25.6895	8.68209	2.93419	30.7339
mmu-miR-155	8.20521e-07	2.05622e-06	1.29753	0.33127	0.974879	0.0967198	0	2.8503	0.164353	0.0180288	0.143832	1.47872	0.854478	0.908451	2.00884	0	4.70166
mmu-miR-154	0.000200542	0.000121874	-0.716115	0.335217	0.979499	180.686	61.4392	168.987	200.245	108.501	227.209	90.434	70.1343	86.7705	154.64	83.1118	88.7184
mmu-miR-30a	0.00561773	0.00346019	-0.699131	0.345665	0.985345	5470.37	5277.93	2289.67	5582.36	5395	2443.27	2532.36	3879.26	1160.09	3383.46	4180.47	1160.51
mmu-miR-539	1.76399e-06	3.70813e-06	1.09626	0.350586	0.985345	4.80347	0	0.0641044	0.299321	2.41808	0.254708	6.77298	1.58484	0.864606	4.04321	2.57664	1.4838
mmu-miR-219	0.000776789	0.00125425	0.692219	0.352678	0.985345	1163.49	219.863	404.334	1166.93	326.65	380.084	1251.21	1135.11	307.047	1595.67	1337.16	280.706
mmu-miR-323-5p	4.27057e-05	2.59729e-05	-0.720385	0.354357	0.985345	48.5889	21.1152	4.88903	40.1779	75.4622	11.1365	8.31929	23.9822	6.28723	24.19	51.8104	7.59091
mmu-miR-137	0.0105245	0.0169325	0.686197	0.354656	0.985345	24663.9	22.075	49.0724	24769.1	19.5441	46.3742	38105.5	32.7489	110.552	41372	27.1719	99.4045
mmu-miR-125b*	8.15382e-05	0.000131518	0.684516	0.355355	0.985345	20.437	53.7755	12.7766	1.0206	74.2358	25.8842	4.07879	21.9334	6.84072	8.67954	28.4151	3.76498
mmu-miR-223	7.50694e-07	1.40329e-06	0.896141	0.356351	0.985345	0.0905126	0	0.0397278	0.15246	2.34247	0.133756	1.10791	2.69932	0	0	2.81795	0
mmu-miR-532-3p	6.88812e-07	1.6664e-06	1.2342	0.356351	0.985345	0.0847724	1.9342	0.0374998	0.14165	0.0161875	0.124552	0	2.91433	1.22837	1.31791	2.2581	0
mmu-let-7g	0.0110633	0.0176246	0.671838	0.364632	0.991158	10252.7	4962.99	12016.1	9121.93	4981.92	10770.6	17632.3	5675.23	19075.7	16686.8	5856.73	18079.4
mmu-miR-652	0.000217903	0.00013637	-0.67184	0.36491	0.991158	240.704	11.5117	211.583	325.603	18.3374	222.386	113.565	9.94775	138.993	239.418	24.935	115.507
mmu-miR-423-3p	5.54369e-05	3.4586e-05	-0.678747	0.367213	0.991158	48.8218	48.9658	6.46928	66.1711	65.7833	26.1233	14.1085	33.8997	6.54175	46.4394	53.4271	8.35364
mmu-miR-26a	0.00952281	0.0151193	0.666961	0.368076	0.991158	10834.5	7047.47	5403.4	10303.1	6215.18	5047.3	16129.2	13130.5	7207.8	15852.7	11972.5	6914.38
mmu-miR-126-5p	6.80554e-05	0.000107479	0.658739	0.387101	1	60.2849	46.0817	56.8804	47.4536	54.8564	55.9128	107.453	56.2647	84.9814	98.7941	65.9309	92.5578
mmu-miR-148b	0.000333885	0.000518368	0.634589	0.394384	1	246.768	250.594	315.804	227.785	234.009	298.487	297.576	603.519	277.028	360.216	665.577	237.111
mmu-miR-23a	0.00221095	0.00143066	-0.627411	0.396946	1	3841.08	190.099	780.164	4697.22	179.2	729.181	2173.7	173.727	340.234	3517.5	184.264	348.795
mmu-miR-210	3.02276e-05	4.75383e-05	0.648191	0.40084	1	42.5961	24.0004	11.1892	20.7636	32.8914	11.0455	17.5672	66.2274	12.7701	26.1529	88.7446	12.1789
mmu-miR-374	1.94643e-05	1.18869e-05	-0.679366	0.407089	1	36.409	5.75094	9.58811	37.4316	3.71284	0.681223	19.4621	4.27771	3.44587	21.6504	3.38211	3.76877
mmu-miR-431	2.66817e-05	4.08351e-05	0.601993	0.416116	1	20.2538	23.0415	20.5806	0.96227	29.2347	30.0717	17.9649	41.584	22.422	22.7934	66.6601	20.6096
mmu-miR-124	0.0306889	0.0202233	-0.601714	0.41634	1	20967.1	36920.5	3191.29	24119.8	56056.9	3277.8	9053.22	25751.4	1976.8	16889.7	39643.2	1930.9
mmu-miR-99b*	1.95228e-05	2.85417e-05	0.503624	0.422757	1	6.17945	34.5821	9.58839	0.907224	35.2453	0.681578	5.99779	47.7874	12.8044	5.96207	48.6351	12.9556
mmu-miR-672	0.00016312	0.000107851	-0.59676	0.42304	1	132.027	96.0079	162.627	101.055	115.799	161.767	97.7978	86.0393	68.5975	81.9668	105.195	68.0527
mmu-let-7i	0.00487982	0.00735875	0.592718	0.42358	1	5487.42	1861.72	4452.76	5168.16	2115.64	3898.99	7244.54	1985.3	7963.53	7248.16	2278.43	7937.3
mmu-miR-27b	0.00137033	0.00205775	0.586555	0.428748	1	1189.92	1049.44	1016.93	1182.21	1095.59	920.86	1287.3	1620	1730.64	1712.54	1660.58	1680.01
mmu-miR-138*	4.42093e-06	2.66569e-06	-0.682748	0.431038	1	5.5821	1.9126	4.72668	0.531919	0.034985	8.71196	1.03672	1.62929	3.45367	0	1.68791	4.65718
mmu-miR-764-3p	3.04026e-06	4.99468e-06	0.70428	0.431708	1	5.28783	3.84417	3.16026	0.430142	0.0318801	0.35627	0.620394	8.14139	1.38148	1.26802	10.4167	1.4771
mmu-miR-193	4.63352e-06	7.80954e-06	0.850027	0.432433	1	10.4761	1.91237	0.089318	10.6825	0.0353327	0.440892	14.9213	1.04434	0	19.7559	1.61982	0
mmu-miR-181c	4.68548e-05	3.11772e-05	-0.568445	0.435379	1	62.7254	21.1146	8.04973	78.0896	18.3308	35.7908	29.2584	26.1797	15.9306	37.6781	29.9264	7.58881
mmu-miR-103	0.00802189	0.0119591	0.576071	0.436387	1	8993.86	9334.55	854.389	8159.83	9657.83	779.808	7562.92	18064.6	771.422	9536.7	19579.2	808.586
mmu-miR-384-5p	0.000119038	0.000178417	0.59291	0.442358	1	268.131	6.71094	31.7321	211.19	4.92819	41.4449	301.78	11.6815	51.9223	408.901	8.22285	58.0836
mmu-miR-466d-3p	9.86765e-07	1.47113e-07	-2.61054	0.443494	1	4.29678	0	0.047198	0.191442	0.0200371	0.166596	0	0.681167	0	0	0	0
mmu-miR-138	0.000836082	0.0012361	0.563868	0.447086	1	579.386	673.06	661.645	528.394	853.054	642.575	418.066	1542.49	655.833	604.842	1969.79	630.346
mmu-miR-331-3p	4.07967e-05	2.73956e-05	-0.569354	0.456683	1	17.6113	19.1946	44.1798	27.4728	25.6251	59.675	18.7911	11.9585	27.4957	25.5344	17.5231	27.5453
mmu-miR-181b	0.00136159	0.000929895	-0.550049	0.457642	1	674.143	483.904	2107.77	702.262	525.294	1920.56	405.374	534.529	1163.75	579.317	595.418	1100.92
mmu-miR-705	2.33544e-06	3.11578e-06	0.348573	0.458754	1	0.186124	7.71877	0.0721434	0.363572	0.0293624	0.305299	7.72451	5.7141	0.345989	0	0.755978	0
mmu-let-7f*	1.63366e-06	7.75089e-07	-1.1249	0.462811	1	30743.7	29056.9	32500.4	28533.7	25519.9	27432.7	66279.1	47384.3	56253.9	56491.8	43328.1	53782.3
mmu-miR-199a-5p	2.4642e-06	1.00681e-06	-1.30753	0.463617	1	5.10543	0	0.0736337	0.376674	4.7998	0.315446	0	0.377951	1.68145	1.36309	0	1.55473
mmu-miR-301a	9.86765e-07	1.85278e-06	0.984043	0.463617	1	4.29678	0	0.047198	0.191442	0.0200371	0.166596	4.13078	0.336377	0.363744	4.17915	0	0
mmu-miR-501-5p	3.89404e-06	5.35256e-06	0.390157	0.471287	1	0.233395	5.76869	0.0853911	0.496743	8.41988	0.405829	2.18279	9.1652	0	2.62821	11.3087	0
mmu-miR-351	3.82441e-05	2.60755e-05	-0.54378	0.47729	1	68.0053	10.5513	31.6192	46.1309	9.8062	16.0594	23.0812	7.72602	10.1995	59.3862	14.8675	7.59085
mmu-miR-9	0.0274549	0.0392412	0.515288	0.485966	1	14008.9	28698.8	22601.7	12334.7	29369.6	22290	19368.9	43799	27430.3	17756	48181.6	28277.4
mmu-miR-339-3p	7.62805e-06	1.1996e-05	0.700371	0.489161	1	8.52105	3.8332	0.098711	17.0445	7.31531	0.537825	7.61247	8.57352	2.92176	16.1904	17.2949	3.7686
mmu-miR-202-3p	1.76399e-06	2.87609e-06	0.738024	0.494843	1	4.80347	0	0.0641044	0.299321	2.41808	0.254708	5.21328	0.570662	2.27494	2.67748	2.61937	0
mmu-miR-505	1.82393e-06	2.90681e-06	0.64145	0.494843	1	0.163098	1.92003	4.46653	0.306577	0.0268023	0.260491	0.632996	2.15439	3.42029	0	5.00664	2.27515
mmu-miR-877	1.46806e-05	9.79296e-06	-0.592426	0.496245	1	6.13079	13.4409	4.87375	19.2703	24.2977	0.644799	4.10385	12.7355	0.848875	6.67974	20.1193	1.47061
mmu-miR-700	3.89511e-06	6.00493e-06	0.620213	0.506128	1	5.48801	0	10.6081	0.496818	0.0340005	0.405884	1.3903	5.15506	7.33923	3.99018	4.79732	5.34501
mmu-miR-101b	0.000906108	0.00127313	0.490997	0.508579	1	874.458	468.544	742.166	854.792	485.067	844.527	1109.83	674.552	1191.63	1195.7	701.031	1123.07
mmu-miR-770-5p	6.3491e-06	9.48416e-06	0.602257	0.514202	1	5.81411	0	3.26054	11.6003	9.69636	0.503172	2.15471	6.8444	3.1959	18.9913	9.69364	3.77387
mmu-miR-9*	0.00127667	0.000915361	-0.479356	0.516688	1	0.296547	12.4903	4.83544	0.720747	18.1596	0.562413	0	0	0	0	0	0
mmu-miR-361	3.99683e-05	5.65005e-05	0.514784	0.52611	1	54.1123	10.5512	26.9204	64.8956	18.3263	16.0796	72.4996	17.8707	38.0142	89.5007	18.3451	29.7917
mmu-let-7c-1*	8.7835e-16	1.9783e-07	27.6602	0.529774	1	1.41138e-10	0	7.03895e-11	2.11325e-10	3.24541e-11	1.91427e-10	0	0	0	1.54672	0	0
mmu-let-7i*	8.7835e-16	2.69223e-07	28.1613	0.529774	1	5487.42	1861.72	4452.76	5168.16	2115.64	3898.99	7244.54	1985.3	7963.53	7248.16	2278.43	7937.3
mmu-miR-217	8.7835e-16	3.07993e-07	28.411	0.529774	1	1.41138e-10	0	7.03895e-11	2.11325e-10	3.24541e-11	1.91427e-10	0.904767	0.541086	0	0	0	0
mmu-miR-32	8.7835e-16	1.9783e-07	27.6602	0.529774	1	1.41138e-10	0	7.03895e-11	2.11325e-10	3.24541e-11	1.91427e-10	0	0	0	1.54672	0	0
mmu-miR-547	8.7835e-16	3.44857e-07	28.6078	0.529774	1	1.41138e-10	0	7.03895e-11	2.11325e-10	3.24541e-11	1.91427e-10	0	0.521207	0.952029	0	0	0
mmu-miR-877*	8.7835e-16	1.9783e-07	27.6602	0.529774	1	6.13079	13.4409	4.87375	19.2703	24.2977	0.644799	4.10385	12.7355	0.848875	6.67974	20.1193	1.47061
mmu-miR-362-3p	2.24924e-05	3.24721e-05	0.547467	0.530327	1	47.6007	12.4748	3.30811	26.2647	7.36522	10.9077	42.4681	16.1789	8.36219	62.0039	17.0587	6.8229
mmu-miR-34a	1.71574e-05	1.20656e-05	-0.495796	0.534298	1	6.16033	10.5555	14.25	19.6802	12.2122	19.9262	2.15034	7.81125	12.9997	5.3079	4.71551	23.8386
mmu-miR-142-3p	6.88812e-07	7.43785e-07	0.0576211	0.536475	1	0.0847724	1.9342	0.0374998	0.14165	0.0161875	0.124552	1.72224	0.409225	0	0	1.42342	0
mmu-miR-19b	6.88812e-07	8.19945e-07	0.220411	0.536475	1	0.0847724	1.9342	0.0374998	0.14165	0.0161875	0.124552	2.68083	1.34081	0	0	0	0
mmu-miR-667	1.39877e-05	1.94941e-05	0.489196	0.539333	1	25.0532	3.83067	14.2025	0.837162	2.49316	19.4978	5.62092	3.75857	24.2132	26.2747	8.23903	23.7446
mmu-miR-107	0.00348429	0.00477098	0.453421	0.53974	1	4403.53	3568.87	355.428	4059.37	3708.36	314.591	3335.67	6816.19	308.61	4274.01	7426.13	309.015
mmu-miR-26b	0.00264357	0.0036108	0.449745	0.54312	1	2482.91	3204.98	868.59	2310.69	2646.92	936.48	4188.81	3382.13	1347.29	3625.43	3066.39	1395.38
mmu-miR-1198	0.00014289	0.000104368	-0.45188	0.545198	1	129.077	117.135	41.2041	205.599	159.627	21.3137	85.8351	84.8074	34.2977	122.361	136.542	27.4794
mmu-miR-665	9.5786e-05	7.00228e-05	-0.456293	0.545597	1	71.8677	133.469	15.9467	67.47	130.351	31.3465	26.0392	107.608	7.06215	46.3306	134.981	7.5877
mmu-miR-152	0.000246883	0.000336751	0.447338	0.547241	1	257.963	262.122	75.9401	213.962	246.165	107.095	280.7	373.402	83.03	377.758	408.957	61.904
mmu-miR-1188	9.06047e-06	6.179e-06	-0.537802	0.54757	1	11.2719	4.79358	7.92452	12.5436	6.12143	0.568713	5.36012	4.887	2.96966	6.73524	8.92147	0
mmu-miR-434-5p	0.000269942	0.000198774	-0.441562	0.552987	1	215.182	218.911	150.109	267.043	293.683	127.273	109.256	221.988	75.0129	185.5	279.176	64.969
mmu-miR-379	0.000318945	0.000432483	0.437806	0.5545	1	255.318	414.79	135.924	174.666	358.268	162.618	333.826	390.395	251.632	364.942	429.579	266.196
mmu-miR-136*	0.000294277	0.00039907	0.439784	0.555426	1	260.977	277.482	101.199	346.621	298.566	102.135	270.259	501.87	127.636	371.005	501.399	107.043
mmu-miR-362-5p	1.10797e-05	1.54171e-05	0.499558	0.559104	1	16.7482	8.6378	0.103988	18.4071	8.55073	0.602454	15.804	16.6145	1.36413	22.2574	14.9635	1.47035
mmu-miR-324-5p	0.000106856	7.82269e-05	-0.437647	0.559775	1	219.621	10.551	4.8795	255.799	14.6831	0.795217	118.02	13.4028	3.704	214.077	16.5739	3.00296
mmu-miR-145	3.31846e-06	5.91283e-06	1.00383	0.562606	1	7.6782	0	0.081499	9.68566	0.0326581	0.373682	2.9679	3.08227	8.44966	3.99145	5.2579	3.79285
mmu-miR-376a	0.000805338	0.000598599	-0.426683	0.563539	1	1392.61	225.624	147.004	1586.03	271.815	173.026	707.501	389.815	67.7307	1186.48	411.894	55.7853
mmu-miR-135b	9.86765e-07	1.71173e-06	0.884735	0.564633	1	4.29678	0	0.047198	0.191442	0.0200371	0.166596	5.53464	0.875704	0	2.02931	0	0
mmu-miR-20a	7.96801e-06	5.177e-06	-0.537385	0.565641	1	11.1468	2.87155	3.27837	22.1193	0.0386786	0.545812	9.07779	0.314122	1.91316	8.84548	0	4.57925
mmu-miR-92b	0.00194196	0.00144864	-0.422578	0.567283	1	1513.98	522.309	2043.19	1836.39	967.658	2264.95	582.13	705.22	1435.38	1402.72	1334.48	1362.53
mmu-miR-499	2.16734e-06	2.59859e-06	0.189171	0.572118	1	0.179122	4.81855	0.0700397	0.345754	2.43343	0.291407	4.40492	2.17996	0.350553	1.98689	3.11931	0
mmu-miR-139-5p	0.000147532	0.000110827	-0.412932	0.576483	1	129.102	124.817	74.3285	127.169	148.672	91.6536	59.5749	116.316	44.4232	124.368	139.608	37.4284
mmu-miR-325*	7.58581e-06	1.05772e-05	0.498605	0.592987	1	1.41138e-10	0	7.03895e-11	2.11325e-10	3.24541e-11	1.91427e-10	0.722528	0.38513	1.71107	0	0	1.56091
mmu-miR-30e*	0.000423384	0.00055561	0.393818	0.5987	1	655.968	73.9204	361.62	559.853	71.9606	273.653	555.327	413.597	231.885	757.55	426.438	231.753
mmu-miR-18a*	3.31846e-06	1.47974e-06	-1.03878	0.599286	1	7.6782	0	0.081499	9.68566	0.0326581	0.373682	2.88455	0	0	4.97628	0	0
mmu-miR-181a-2*	7.50694e-07	1.1007e-06	0.570749	0.60113	1	0.0905126	0	0.0397278	0.15246	2.34247	0.133756	0	2.84056	1.3243	0	0.833394	0
mmu-miR-365	0.000139918	0.000106386	-0.385767	0.601402	1	316.854	5.75109	9.62288	322.853	6.14725	0.802352	193.999	6.9808	10.4327	271.169	8.21618	10.648
mmu-miR-541	0.000953596	0.00124583	0.38523	0.602305	1	376.027	1106.09	800.583	388.616	944.457	874.896	521.287	1706.08	708.218	588.709	1655.89	686.963
mmu-miR-342-5p	2.62698e-05	1.93343e-05	-0.466381	0.604126	1	11.8606	44.1818	6.46509	0.959772	41.3655	15.8172	1.38383	35.9873	8.13278	1.93161	40.3937	2.99834
mmu-let-7c	0.207976	0.270954	0.381629	0.605417	1	150883	196462	160198	139675	190970	141313	228708	228828	210105	185665	214257	208544
mmu-miR-671-3p	6.39534e-06	4.02638e-06	-0.733266	0.606137	1	0.274567	8.64776	9.35472	0.63544	7.29854	0.504571	0	3.15384	3.32055	0	7.24382	5.38777
mmu-miR-434-3p	0.00390669	0.00301931	-0.371561	0.614896	1	4919.61	966.857	3437.48	4533.49	914.052	3630.74	3162.1	852.142	2734.85	3864.08	950.547	2656.21
mmu-miR-668	8.31979e-05	0.000108723	0.387559	0.615043	1	68.9353	62.4055	26.9882	105.974	102.338	26.2959	31.804	119.303	22.3563	88.0232	222.169	28.2443
mmu-miR-540-3p	0.000174733	0.000135133	-0.370759	0.618466	1	120.656	105.61	143.728	101.144	160.868	191.887	58.3977	122.448	92.7257	114.914	162.037	85.6489
mmu-miR-744	0.00143629	0.00111571	-0.364593	0.622156	1	1247.27	1482.47	199.111	1348.94	2272.72	213.488	455.818	1347.51	128.661	998.761	2215.96	107.808
mmu-miR-598	0.00186535	0.00239998	0.363809	0.623426	1	1551.21	400.37	2660.45	1462.88	366.876	2345.66	1236.05	1577.65	2643.14	1663.46	1664.08	2518.52
mmu-miR-28*	7.07547e-06	8.69171e-06	0.244945	0.625789	1	5.87212	12.4968	4.80986	0.663474	6.10552	0.523817	2.54663	11.7641	3.46729	6.69117	14.7232	1.4711
mmu-miR-369-3p	0.000684919	0.000879228	0.360127	0.626485	1	95.1224	379.251	1171.37	74.9761	287.653	1216.82	122.679	388.52	1562.75	127.613	335.689	1603.64
mmu-miR-29b	0.000540246	0.000423856	-0.349725	0.636779	1	252.701	243.869	655.206	274.91	301.048	817.974	200.508	237.876	527.481	254.68	232.287	543.217
mmu-miR-16	9.56041e-05	0.000122327	0.358883	0.644173	1	134.324	72.9673	30.1475	125.869	62.1831	26.3287	99.6967	140.105	32.7329	131.754	121.926	49.6732
mmu-miR-1	0.000414766	0.000326705	-0.347355	0.644634	1	75.0534	897.765	79.1075	101.677	759.118	36.464	92.2632	644.943	52.1715	79.2223	615.597	54.2535
mmu-miR-1-2-as	0.000416563	0.000328605	-0.345222	0.647054	1	75.0535	902.566	79.1075	101.678	762.774	36.4636	93.8039	649.397	52.6901	79.8945	617.356	54.2535
mmu-miR-340-5p	0.000681535	0.000860308	0.336629	0.651103	1	854.107	361.968	470.613	720.914	308.368	496.006	1277.56	407.331	472.269	1090.23	344.494	459.744
mmu-miR-328	9.76512e-05	7.67701e-05	-0.340587	0.652438	1	6.203	36.476	63.2438	28.1542	63.4019	263.896	7.92288	39.4383	120.547	23.4404	57.6006	112.523
mmu-miR-106b	6.61208e-05	8.3942e-05	0.353468	0.657908	1	51.7715	12.4711	86.7414	73.0939	9.80821	80.4113	65.0262	16.6198	107.983	71.2261	19.6561	114.806
mmu-miR-382	0.000949403	0.00119011	0.325675	0.659907	1	699.767	1045.6	450.134	708.412	1106.52	460.996	891.062	1202.94	527.987	1157.39	1297.55	527.825
mmu-miR-30b	5.10199e-05	6.55901e-05	0.38903	0.659924	1	57.2037	8.63058	15.9356	116.109	11.0262	35.8929	94.5044	17.864	30.6974	115.748	18.7806	31.3177
mmu-miR-770-3p	0.000151448	0.000121609	-0.313006	0.668972	1	157.621	50.8778	101.135	205.848	98.7428	101.685	87.3468	54.2657	95.3503	149.928	92.3735	93.3127
mmu-miR-299	4.69863e-05	3.72721e-05	-0.330594	0.669794	1	31.7864	26.8772	23.799	65.5814	58.4649	16.1416	26.1115	31.8757	7.31966	47.0978	48.5107	14.4809
mmu-miR-92a	0.000477048	0.000383657	-0.313565	0.671553	1	450.151	167.056	440.55	460.755	280.328	450.088	225.95	217.342	297.585	459.771	352.094	253.96
mmu-miR-17*	4.05543e-06	4.67573e-06	0.162939	0.678201	1	1.41138e-10	0	7.03895e-11	2.11325e-10	3.24541e-11	1.91427e-10	4.0222	0.842736	1.7477	3.41335	0.769553	0
mmu-miR-323-3p	0.000324988	0.000402579	0.308911	0.679484	1	235.312	194.903	317.374	221.112	264.465	298.439	140.41	426.825	290.567	251.322	544.121	242.479
mmu-miR-28	6.73543e-05	8.37887e-05	0.319633	0.688046	1	17.6879	6.71048	133.885	40.9741	9.8082	109.825	27.5729	9.44661	143.164	52.3748	9.09275	153.12
mmu-miR-124*	8.5375e-05	6.89307e-05	-0.315311	0.688545	1	20967.1	36920.5	3191.29	24119.8	56056.9	3277.8	9053.22	25751.4	1976.8	16889.7	39643.2	1930.9
mmu-miR-181a	0.00183724	0.00149678	-0.295395	0.689219	1	2135.78	878.526	1028.03	2196.24	1000.56	1416.24	1000.41	1134.56	915.394	1830.23	1268.88	899.648
mmu-miR-298	6.42614e-05	5.17069e-05	-0.310841	0.691174	1	105.41	53.7657	4.88552	85.7721	52.4182	0.775902	48.1265	43.2502	1.37983	79.4096	68.3237	3.00094
mmu-miR-495	0.00014646	0.00018027	0.303669	0.692851	1	188.913	111.373	30.1575	238.375	81.6896	41.5018	158.636	174.179	35.5786	281.725	165.918	32.8326
mmu-miR-380-3p	0.000347679	0.000284731	-0.286559	0.697564	1	252.513	14.3924	550.872	274.263	18.3351	529.727	190.541	11.9369	442.307	260.102	7.78921	428.491
mmu-miR-669c	6.56325e-05	5.37228e-05	-0.283789	0.705106	1	68.7396	58.5675	11.2088	98.6052	57.287	16.2191	51.9886	59.4318	7.5777	59.1686	64.7678	9.88209
mmu-miR-451	6.22186e-05	7.53094e-05	0.259426	0.70559	1	31.9024	125.803	20.6706	21.396	88.9089	0.774355	44.5688	111.792	15.0967	51.711	113.718	17.5331
mmu-miR-151-3p	0.000136872	0.000112563	-0.284989	0.710475	1	86.2973	144.024	69.5906	87.6519	185.191	71.5755	62.2742	124.999	53.5151	108.211	128.128	52.7379
mmu-miR-222	0.0036851	0.00444222	0.269314	0.715	1	1686.24	6273.62	477.012	1710.67	6668.39	537.113	1368.11	7705.03	484.133	1720.55	9124.78	518.633
mmu-let-7a	0.0728691	0.0878095	0.26907	0.715486	1	62949.5	50756.2	67309.2	57147	48410	56619.5	87894.8	55126.4	72204.7	74654.5	52302	71372.1
mmu-miR-148a	0.000145745	0.000175533	0.266018	0.718211	1	43.486	101.771	184.651	21.5451	137.711	196.405	84.2087	146.917	182.82	99.4156	156.227	156.825
mmu-miR-329	3.9609e-05	3.2648e-05	-0.259555	0.719129	1	54.1004	3.83017	25.3492	58.6635	17.1094	30.7151	14.8877	18.4233	39.5008	24.8367	26.8091	29.0625
mmu-miR-221	0.00208851	0.00249581	0.256839	0.727949	1	1803.48	2674.98	432.801	1669.84	2717.57	537.085	1727.1	3151.67	487.242	2377.96	3397.52	612.734
mmu-miR-690	4.87511e-06	6.34306e-06	0.412629	0.749731	1	5.65039	0	4.74719	0.559294	3.67731	8.90749	8.17221	2.30617	3.23529	12.2483	1.6253	2.24317
mmu-miR-101a	0.00222654	0.0026173	0.233242	0.752213	1	720.11	1204.02	3519.37	495.677	978.631	3568.57	1023.45	1275.01	3821.71	1144.55	1235.78	3826.03
mmu-miR-485	0.000146678	0.000172854	0.236231	0.756292	1	146.194	108.492	45.9382	146.822	197.379	46.5325	69.9455	157.334	67.237	178.795	237.353	103.241
mmu-miR-375	7.99076e-05	9.42049e-05	0.238806	0.758947	1	77.4124	26.8742	75.7972	34.6331	57.3023	105.464	49.9459	56.0375	88.1434	90.0624	77.4248	81.8481
mmu-miR-411	0.00126611	0.00108281	-0.225359	0.760088	1	871.831	359.084	1730.45	1008.77	422.929	1572.03	838.695	255.87	1244.61	1197.74	262.17	1300.6
mmu-miR-100	0.00034666	0.000405469	0.227676	0.762557	1	178.127	57.5979	490.926	247.739	70.7416	589.984	178.936	102.476	629.247	248.632	112.967	637.356
mmu-miR-127*	0.000263344	0.000226205	-0.218206	0.767024	1	212.307	129.612	219.517	220.715	162.116	298.002	156.658	121.585	187.929	287.72	134.588	176.703
mmu-miR-337-3p	3.21662e-05	3.85852e-05	0.292054	0.767704	1	37.1101	0	25.3136	51.6363	6.15129	35.1837	69.21	2.03731	18.7761	71.4031	2.93602	17.5456
mmu-miR-146b	0.000445505	0.000518433	0.21956	0.769075	1	498.724	199.702	360.053	414.114	223.059	404.648	306.437	509.431	355.375	379.04	553.718	337.349
mmu-miR-195	2.23572e-05	2.67405e-05	0.300301	0.769639	1	28.4068	9.59276	4.88659	55.5841	8.58098	0.696919	32.0337	17.4598	11.2427	40.4199	19.3025	5.29294
mmu-miR-151-5p	0.000322331	0.000277839	-0.213078	0.772826	1	229.588	101.765	385.205	247.606	117.044	439.079	189.003	87.1444	334.302	276.919	108.14	312.921
mmu-miR-194	1.32339e-05	1.63737e-05	0.355721	0.773479	1	30.2767	0	6.42927	24.467	2.49291	0.629876	22.0664	2.02801	10.2598	32.4383	2.05377	8.37052
mmu-miR-450b-3p	1.87836e-06	2.38084e-06	0.365064	0.778526	1	4.86057	0	3.05888	0.313053	0.0271151	0.265637	2.29822	0	2.32277	5.54988	0	1.49987
mmu-miR-29a*	1.03927e-05	8.71239e-06	-0.22306	0.77876	1	16.6669	3.83158	4.85171	18.1898	6.12834	0.592018	16.8589	2.78961	0.341105	14.9049	4.74343	1.47109
mmu-miR-15a	1.70658e-05	1.42953e-05	-0.268541	0.779242	1	8.94518	26.8964	0.108488	19.667	23.1135	0.664995	8.76217	23.2637	3.96121	5.97741	21.2721	3.766
mmu-miR-708	0.000242246	0.000209811	-0.205843	0.779242	1	157.958	74.8812	336.195	194.101	67.0836	312.825	135.466	81.4679	259.643	182.129	82.1728	247.134
mmu-miR-381	0.000107738	9.3198e-05	-0.20446	0.780303	1	49.1423	23.9929	159.32	87.2426	19.5579	170.592	60.7576	36.4398	94.9151	114.978	39.9264	91.8068
mmu-miR-543	0.00058156	0.000504057	-0.205971	0.780703	1	682.163	442.624	206.99	687.158	513.064	208.317	342.659	600.066	112.586	536.369	681.884	100.156
mmu-miR-129-5p	0.00129139	0.00112041	-0.2052	0.781757	1	851.784	1322.12	383.845	942.168	2044.83	536.936	469.298	1270.29	286.565	915.406	2059.66	275.351
mmu-miR-337-5p	0.000142686	0.00016442	0.202555	0.783635	1	137.623	163.229	9.62263	140.196	209.55	11.149	62.6245	238.455	13.0286	127.673	317.2	15.2384
mmu-miR-300	0.000232081	0.000202872	-0.193242	0.79275	1	246.479	136.334	183.212	207.214	134.09	187.406	169.791	123.585	117.844	294.475	142.535	107.06
mmu-miR-433	0.00283666	0.00248695	-0.18989	0.797183	1	1915.46	2994.7	1343.84	2144.06	3297.66	1664.33	1110.5	3243.73	818.097	1744.11	3953.04	843.015
mmu-miR-485*	0.000203105	0.000177849	-0.189628	0.797719	1	146.194	108.492	45.9382	146.822	197.379	46.5325	69.9455	157.334	67.237	178.795	237.353	103.241
mmu-miR-199a-3p/mmu-miR-199b	0.000129357	0.000113792	-0.181326	0.804348	1	74.8665	51.8386	137.345	120.31	56.1071	171.179	88.1323	50.5541	131.006	102.151	46.0843	117.824
mmu-let-7d	0.0232209	0.0204612	-0.182543	0.804643	1	17652.7	26331.1	12388.9	16955	24116	11919.3	13882.1	24310.5	10421.3	14595.7	22031.4	11124.4
mmu-miR-380-5p	1.5078e-05	1.71223e-05	0.182975	0.805129	1	0.326655	7.67356	20.4211	0.853927	12.2033	28.5455	7.95977	11.2772	22.954	9.35076	10.4759	18.3719
mmu-miR-30c	0.000586292	0.000663754	0.180558	0.810598	1	1025.6	114.247	271.711	886.441	117.051	349.585	1049.99	161.359	285.558	1209.3	143.772	276.125
mmu-miR-330	0.000226271	0.000199935	-0.177565	0.811185	1	280.708	164.181	45.9479	292.848	231.539	51.6522	174.423	162.495	34.8001	259.496	280.496	29.7724
mmu-miR-341	0.000251798	0.000223358	-0.170248	0.815377	1	232.274	121.93	128.013	359.204	154.804	192.542	94.5954	184.024	139.117	229.203	266.347	138.435
mmu-miR-409-5p	0.0001888	0.000167654	-0.168745	0.818376	1	266.198	98.8874	85.3915	259.219	99.9718	81.8102	149.011	113.214	57.1159	253.486	156.238	60.3807
mmu-miR-187	7.36838e-05	8.36564e-05	0.181125	0.81854	1	34.7955	65.2884	33.2841	66.957	105.969	41.1785	28.3445	92.0889	43.4146	46.9898	142.389	40.4986
mmu-miR-411*	0.000199388	0.000177466	-0.165435	0.821164	1	871.831	359.084	1730.45	1008.77	422.929	1572.03	838.695	255.87	1244.61	1197.74	262.17	1300.6
mmu-miR-24-2*	1.4716e-05	1.27229e-05	-0.178939	0.821328	1	11.6298	2.87017	17.3154	13.5752	2.49334	24.0514	8.38831	2.27653	16.4505	11.4139	0.742265	20.7338
mmu-miR-805	1.14309e-05	1.32894e-05	0.19145	0.824616	1	6.06627	12.4839	7.96554	0.789425	14.5934	10.3048	9.95076	18.2099	6.59652	7.33563	16.3545	3.76696
mmu-miR-326	3.69123e-05	3.25696e-05	-0.156309	0.824702	1	56.7925	12.4721	6.46968	76.7846	13.4574	11.1059	34.2994	6.97383	8.10195	81.6147	15.7302	6.82288
mmu-miR-23b	0.00352738	0.00315868	-0.158868	0.829274	1	6885.66	126.73	699.65	7982.09	132.887	789.935	5172.14	231.382	503.835	8198.18	235.765	535.463
mmu-miR-500	1.56385e-05	1.77701e-05	0.170828	0.83164	1	0.328308	19.2078	6.44247	13.6804	23.0997	10.6395	4.84956	25.1592	6.30527	8.67217	32.3826	6.06395
mmu-miR-126-3p	1.78124e-05	1.99596e-05	0.154149	0.832184	1	6.16634	10.5551	34.4453	0.889106	6.14521	24.5486	4.45969	9.9959	30.5511	7.31619	10.9021	30.67
mmu-miR-324-3p	7.71627e-06	6.64567e-06	-0.195673	0.833531	1	16.228	2.87168	3.27618	0.687227	3.69782	9.74179	5.74454	3.83716	3.76701	6.72426	5.6906	5.33686
mmu-miR-673-5p	0.000132794	0.000147972	0.151183	0.834456	1	97.6833	168.032	55.3967	34.8653	186.404	81.5513	56.4631	203.289	53.2302	89.3385	236.986	57.3223
mmu-miR-376b	0.00015389	0.000171286	0.16365	0.841048	1	243.082	7.67119	58.5608	349.68	13.4629	56.5991	245.463	30.4736	74.2472	353.741	36.3793	66.5028
mmu-miR-338-3p	0.000273451	0.000302283	0.140612	0.843591	1	80.7613	550.188	15.9372	108.17	508.071	21.2767	89.9544	618.75	18.4778	103.425	576.874	16.0064
mmu-miR-125a-5p	0.00302608	0.00274851	-0.138643	0.850852	1	3033.33	1649.52	1853.83	3365.06	1662.29	2690.28	2512.39	1947.05	1389.85	3748.49	2010.91	1335.71
mmu-miR-496	0.000158325	0.000174672	0.143371	0.852415	1	80.6482	2.87132	337.519	74.6464	4.92689	246.491	51.4441	8.22368	378.019	66.4616	6.4652	312.243
mmu-miR-30a*	0.00101137	0.000920107	-0.135642	0.854381	1	5470.37	5277.93	2289.67	5582.36	5395	2443.27	2532.36	3879.26	1160.09	3383.46	4180.47	1160.51
mmu-miR-455	1.453e-05	1.60177e-05	0.115267	0.854787	1	33.1374	15.3638	3.30341	0.845727	12.2004	0.643352	10.7004	12.3009	2.91531	25.6463	20.7764	2.9989
mmu-miR-30c-1*	1.38706e-05	1.26288e-05	-0.0990929	0.861585	1	25.0397	3.83069	9.5468	19.1088	0.0409736	10.5233	16.2684	3.02281	3.18144	31.1838	0.742221	5.30442
mmu-miR-501-3p	8.03662e-05	7.29275e-05	-0.142139	0.867983	1	108.578	52.8024	34.8664	73.6134	97.4651	11.1784	46.5054	65.0423	28.6059	88.0884	95.1677	19.8296
mmu-miR-338-5p	6.42699e-05	7.00674e-05	0.111785	0.868836	1	23.384	103.71	22.2478	21.4104	108.375	21.2205	25.6532	120.056	12.7626	36.2306	127.463	7.5877
mmu-miR-540-5p	3.11611e-05	2.80339e-05	-0.170755	0.869025	1	14.7185	29.7642	33.1334	0.985838	40.1805	25.5818	9.08974	27.9679	24.3365	16.0744	34.4031	19.8631
mmu-miR-376c	1.40322e-05	1.57042e-05	0.216444	0.874533	1	27.7298	4.79131	4.87155	30.2003	0.0410115	0.638401	20.5122	9.02675	3.43599	26.332	10.0418	4.53171
mmu-miR-186	0.000353252	0.000383978	0.122039	0.87678	1	364.058	54.7175	416.789	340.566	56.118	434.318	331.927	73.771	456.676	421.442	66.307	458.287
mmu-miR-676	0.000399365	0.000369957	-0.109859	0.884354	1	504.315	337.009	41.2089	533.104	409.462	56.724	294.553	353.055	55.283	523.661	473.677	42.0137
mmu-let-7e	0.0282788	0.0304539	0.106904	0.884804	1	27552.6	30684.4	12303.6	24860.8	25145.8	12637.4	35291.9	31921.1	11541.4	24318.7	26347.7	14007.1
mmu-miR-582-3p	5.76675e-06	4.80572e-06	-0.319707	0.885517	1	5.7581	6.72391	0.0937837	0.606486	10.8773	0.484446	4.20631	4.69666	1.91972	4.01109	3.00188	4.58565
mmu-miR-134	1.95628e-05	2.02236e-05	0.00368576	0.886406	1	6.17971	40.3497	0.109609	0.907619	38.8783	0.68182	6.00684	37.4688	1.11073	2.60233	47.9721	0
mmu-miR-93	0.000301101	0.00032272	0.101254	0.897556	1	77.9062	81.602	489.278	187.855	84.1447	499.073	71.0772	116.347	544.521	113.507	160.976	513.422
mmu-miR-99b	0.000589243	0.000554009	-0.0884212	0.90588	1	458.898	348.527	367.995	587.539	467.982	546.196	160.042	417.063	543.454	394.496	554.579	539.354
mmu-miR-409-3p	9.05879e-05	9.72432e-05	0.106055	0.909493	1	40.5452	27.8341	116.749	80.3656	47.5697	115.667	57.6623	38.172	100.365	109.582	43.4507	108.654
mmu-miR-29a	0.0865308	0.0817032	-0.0828212	0.91061	1	28074.8	53748.1	115018	29322.6	52982.4	128387	18925.3	62215.6	105032	27534	64004.3	107085
mmu-miR-22*	7.02552e-05	7.4892e-05	0.104796	0.914682	1	0.0905126	0	0.0397278	0.15246	2.34247	0.133756	1.10791	2.69932	0	0	2.81795	0
mmu-miR-331-5p	3.91674e-06	2.8413e-06	-0.519354	0.916035	1	0.233914	7.69795	3.20256	0.498342	3.66319	0.407002	2.26261	5.21251	0	0	5.98311	0
mmu-miR-378	0.000885058	0.000841411	-0.0739734	0.922256	1	487.746	1440.23	145.426	401.89	1537.85	152.808	243.994	1440.75	120.362	342.033	1693.09	122.342
mmu-miR-181a-1*	6.1741e-05	5.86031e-05	-0.0781534	0.924091	1	48.897	53.7664	58.4292	27.9162	41.464	60.6654	31.0763	42.9679	49.7393	60.5014	44.8405	46.6483
mmu-miR-125b-5p	0.0130605	0.01244	-0.0701577	0.924277	1	21298.8	2770.01	6824.5	21119.1	2548.27	6953.65	18836.3	2680.27	4922.75	24687.9	2659.14	4802.1
mmu-miR-25	0.000639024	0.000611205	-0.0640681	0.930216	1	699.443	425.34	456.396	587.756	457.022	384.971	379.614	458.628	486.606	582.727	484.982	485.781
mmu-miR-140*	0.00139534	0.00146024	0.065408	0.930736	1	0.0847724	1.9342	0.0374998	0.14165	0.0161875	0.124552	3.09788	1.88738	1.15314	2.67828	2.14853	2.27628
mmu-miR-335-5p	0.000285361	0.000272281	-0.0648534	0.931426	1	275.241	20.1527	344.148	339.903	19.5551	348.376	276.133	17.3723	356.383	264.144	15.702	352.724
mmu-miR-433*	8.44979e-05	9.01283e-05	0.0983388	0.932619	1	1915.46	2994.7	1343.84	2144.06	3297.66	1664.33	1110.5	3243.73	818.097	1744.11	3953.04	843.015
mmu-miR-127	0.00854524	0.00891679	0.0614493	0.933966	1	9578.74	4635.58	4751.28	9808.8	5748.44	5724.67	6041.01	7303.6	4376.47	10522.8	9593.2	4157.94
mmu-miR-30c-2*	2.36581e-05	2.5362e-05	0.127186	0.935518	1	17.4049	0	36.1517	26.3987	0.0423782	34.4603	28.5447	1.05225	28.8414	35.0191	1.61879	24.4805
mmu-miR-410	5.36402e-05	5.65214e-05	0.0910862	0.941031	1	79.7727	9.59072	39.5371	85.01	6.15133	35.9477	57.3946	25.5681	27.8516	98.2677	33.3563	23.6631
mmu-miR-136	1.6819e-05	1.59264e-05	-0.0870793	0.942146	1	14.4427	17.2836	4.8793	19.6306	21.9009	0.663117	4.85376	20.1498	6.83934	9.35573	22.1239	11.4489
mmu-miR-154*	2.87748e-05	2.96709e-05	0.023372	0.944661	1	180.686	61.4392	168.987	200.245	108.501	227.209	90.434	70.1343	86.7705	154.64	83.1118	88.7184
mmu-miR-143	0.000387185	0.00040123	0.0523974	0.946382	1	258.294	148.813	432.598	307.636	163.35	515	222.862	135.394	539.708	327.972	146.428	517.207
mmu-miR-22	0.000681304	0.000659661	-0.0461197	0.954624	1	307.185	71.0402	1259.75	301.746	89.0215	1181.53	227.057	97.5224	1210.67	395.825	96.2363	1079.56
mmu-miR-370	2.26536e-05	2.18392e-05	-0.0683991	0.957021	1	11.8181	23.0444	15.8607	14.2045	30.4258	10.9118	7.94108	16.2515	20.2076	15.4196	28.2598	14.5037
mmu-let-7b	0.0890833	0.0867273	-0.0386719	0.958223	1	69222.8	81059.4	69478.7	61861.6	78677.8	59254.2	71940.8	70823.3	69549.2	57086.6	65522.8	73534.9
mmu-miR-181d	0.000142047	0.000145883	0.037274	0.963424	1	151.86	131.539	72.7478	113.97	137.708	61.5809	115.479	145.243	56.3468	153.93	158.483	57.3227
mmu-miR-666-5p	1.85548e-05	2.0118e-05	0.129878	0.967283	1	19.9898	16.3207	0.10919	31.466	19.4909	0.675469	6.39455	25.0929	3.17288	17.459	39.4721	2.99829
mmu-miR-488	8.04509e-05	8.2357e-05	0.0275492	0.967784	1	74.5831	109.465	30.1391	41.1721	91.3807	31.2836	45.3293	107.511	37.6951	40.2601	110.142	46.6258
mmu-miR-146a	0.000168167	0.000171882	0.0337719	0.97288	1	186.227	50.8775	181.551	160.308	63.4226	151.83	120.847	95.6122	179.19	139.777	94.0852	179.794
mmu-miR-129-3p	0.000291691	0.000284238	-0.0353605	0.973631	1	372.416	139.213	178.519	366.415	117.042	202.778	162.019	274.629	185.537	247.998	266.273	201.942
mmu-miR-30e	0.000336468	0.000331456	-0.0220175	0.977242	1	292.53	448.396	60.1598	373.532	353.401	56.726	276.464	443.514	76.806	266.134	422.18	75.6755
mmu-miR-346	4.6148e-05	4.721e-05	0.0544235	0.979187	1	59.8995	0	41.0761	90.4865	3.71223	25.996	41.9524	2.04048	31.2699	113.86	2.93824	30.5676
mmu-miR-330*	0.000400893	0.00040528	0.0166705	0.98442	1	280.708	164.181	45.9479	292.848	231.539	51.6522	174.423	162.495	34.8001	259.496	280.496	29.7724
mmu-miR-873	5.07263e-05	4.81486e-05	-0.0724691	0.986855	1	23.3318	11.5112	94.4557	21.2825	9.8079	79.6439	9.84705	5.48871	89.5568	20.7629	10.8537	90.3924
mmu-miR-708*	2.84289e-05	2.87059e-05	0.00981628	0.988683	1	157.958	74.8812	336.195	194.101	67.0836	312.825	135.466	81.4679	259.643	182.129	82.1728	247.134
mmu-miR-192	0.000213937	0.000219475	0.0359102	0.992387	1	177.88	217.954	83.8231	141.03	240.058	147.167	130.832	243.758	101.219	174.052	284.865	98.6387
mmu-miR-369-5p	0.0013492	0.00134673	-0.00223858	0.997298	1	1897.56	921.736	183.321	2168.21	992.011	193.26	1332.46	1279.62	167.293	1954.61	1432.67	175.895
mmu-miR-24	0.000455305	0.000454769	-0.00307827	0.999273	1	163.88	614.502	180.141	268.065	733.554	182.985	133.085	659.801	159.273	210.976	833.887	144.533
mmu-miR-106b*	1.25676e-05	1.14521e-05	-0.141926	1	1	51.7715	12.4711	86.7414	73.0939	9.80821	80.4113	65.0262	16.6198	107.983	71.2261	19.6561	114.806
mmu-miR-10a	1.1416e-06	1.59141e-06	0.623947	1	1	0.122071	0	0.0513657	0.215242	0.0216518	6.05984	1.09001	1.74636	0	2.76161	0	2.3241
mmu-miR-1187	8.7835e-16	1.47113e-07	27.3651	1	1	1.41138e-10	0	7.03895e-11	2.11325e-10	3.24541e-11	1.91427e-10	0	0.681167	0	0	0	0
mmu-miR-1191	7.10585e-06	6.29553e-06	-0.160406	1	1	0.282356	0	18.4793	0.664655	0.0380707	13.6119	0.618571	0.555222	13.6653	0	1.18152	13.9126
mmu-miR-130a	1.05497e-05	1.0366e-05	0.0108872	1	1	19.3117	7.67682	0.103375	18.2413	4.91829	0.594488	8.82231	13.9923	2.66531	10.0805	9.22022	3.77161
mmu-miR-133b	8.7835e-16	1.49443e-07	27.382	1	1	1.41138e-10	0	7.03895e-11	2.11325e-10	3.24541e-11	1.91427e-10	0	0	0.712805	0	0	0
mmu-miR-142-5p	1.03535e-05	1.08378e-05	0.114449	1	1	11.3879	1.91025	4.8514	12.8601	6.12817	14.4881	13.5596	5.04264	5.03481	17.5808	5.17012	4.53975
mmu-miR-145*	3.988e-05	4.0253e-05	-0.00681962	1	1	7.6782	0	0.081499	9.68566	0.0326581	0.373682	2.9679	3.08227	8.44966	3.99145	5.2579	3.79285
mmu-miR-146b*	6.88812e-07	4.04249e-07	-0.76673	1	1	498.724	199.702	360.053	414.114	223.059	404.648	306.437	509.431	355.375	379.04	553.718	337.349
mmu-miR-147	8.7835e-16	1.47113e-07	27.3651	1	1	1.41138e-10	0	7.03895e-11	2.11325e-10	3.24541e-11	1.91427e-10	0	0.681167	0	0	0	0
mmu-miR-149	6.73117e-06	6.41227e-06	-0.108923	1	1	8.42035	9.60944	0.0966151	0.649676	9.70481	0.514373	2.56444	10.3732	6.49104	1.9403	6.15516	2.24292
mmu-miR-150	1.24988e-05	1.22039e-05	-0.0303617	1	1	0.317462	2.87037	28.0374	0.811006	2.49259	23.5633	2.92357	3.02396	23.1757	5.30739	3.82509	19.1962
mmu-miR-15a*	8.20521e-07	6.12929e-07	-0.403735	1	1	8.94518	26.8964	0.108488	19.667	23.1135	0.664995	8.76217	23.2637	3.96121	5.97741	21.2721	3.766
mmu-miR-15b	4.30565e-06	4.74339e-06	0.159119	1	1	0.242252	5.7664	0.0877005	10.4634	3.66967	0.426107	3.80356	3.90743	3.55863	6.78342	2.54611	1.47806
mmu-miR-16*	5.91553e-06	5.7789e-06	-0.0611036	1	1	134.324	72.9673	30.1475	125.869	62.1831	26.3287	99.6967	140.105	32.7329	131.754	121.926	49.6732
mmu-miR-185	0.00177154	0.00177601	0.00404125	1	1	3089.9	729.702	410.694	2829.32	860.418	425.848	2491.75	915.529	494.25	2849.91	1124.9	488.033
mmu-miR-186*	7.50694e-07	4.60613e-07	-0.669221	1	1	364.058	54.7175	416.789	340.566	56.118	434.318	331.927	73.771	456.676	421.442	66.307	458.287
mmu-miR-188-5p	8.7835e-16	3.15375e-07	28.317	1	1	1.41138e-10	0	7.03895e-11	2.11325e-10	3.24541e-11	1.91427e-10	0	0	0	2.30906	0	0
mmu-miR-203*	8.7835e-16	2.17822e-07	27.9339	1	1	53.965	14.3931	42.5713	33.5287	14.6735	11.0992	22.4013	7.24814	15.5054	20.1788	9.57444	13.7449
mmu-miR-211	9.86765e-07	1.07716e-06	0.174057	1	1	4.29678	0	0.047198	0.191442	0.0200371	0.166596	1.15239	0	0.699195	2.0935	0	1.54939
mmu-miR-214*	8.7835e-16	2.13637e-07	27.9122	1	1	1.41138e-10	0	7.03895e-11	2.11325e-10	3.24541e-11	1.91427e-10	0	1.04733	0	0	0	0
mmu-miR-216b	9.86765e-07	3.62309e-07	-1.40011	1	1	4.29678	0	0.047198	0.191442	0.0200371	0.166596	0	0	0.545662	0	0	1.64341
mmu-miR-224	8.7835e-16	1.49443e-07	27.382	1	1	1.41138e-10	0	7.03895e-11	2.11325e-10	3.24541e-11	1.91427e-10	0	0	0.712805	0	0	0
mmu-miR-26b*	8.7835e-16	1.49443e-07	27.382	1	1	2482.91	3204.98	868.59	2310.69	2646.92	936.48	4188.81	3382.13	1347.29	3625.43	3066.39	1395.38
mmu-miR-27a*	8.7835e-16	1.47113e-07	27.3651	1	1	195.091	165.14	225.8	114.694	185.255	232.582	189.725	442.922	309.25	248.633	434.004	272.323
mmu-miR-27b*	3.42422e-05	3.48496e-05	0.0433783	1	1	1189.92	1049.44	1016.93	1182.21	1095.59	920.86	1287.3	1620	1730.64	1712.54	1660.58	1680.01
mmu-miR-300*	6.88812e-07	3.07993e-07	-1.19654	1	1	246.479	136.334	183.212	207.214	134.09	187.406	169.791	123.585	117.844	294.475	142.535	107.06
mmu-miR-31*	8.7835e-16	1.49443e-07	27.382	1	1	69.1733	203.563	34.8906	87.6131	209.537	21.314	27.1933	123.246	11.7252	30.8427	142.459	15.2374
mmu-miR-322*	4.42987e-05	4.48335e-05	0.0206917	1	1	0.0847724	1.9342	0.0374998	0.14165	0.0161875	0.124552	1.48651	2.54971	0.914083	2.72785	0	1.50967
mmu-miR-335-3p	1.92008e-05	1.78552e-05	-0.0939864	1	1	11.7582	1.9101	36.0414	13.995	3.71278	24.7228	11.0738	1.53683	26.6449	16.7978	2.05393	26.0694
mmu-miR-339-5p	8.3204e-06	7.94652e-06	-0.0493537	1	1	13.7763	5.75601	0.100067	12.3298	7.32245	0.553634	4.51909	6.3746	2.15138	12.8714	8.38064	3.00842
mmu-miR-34c*	8.7835e-16	1.49443e-07	27.382	1	1	45.7313	47.051	3.30561	40.0539	43.8596	11.1267	89.6352	189.418	18.4668	133.075	219.363	17.5324
mmu-miR-412	8.7835e-16	2.17822e-07	27.9339	1	1	1.41138e-10	0	7.03895e-11	2.11325e-10	3.24541e-11	1.91427e-10	0	0	1.09272	0	0	0
mmu-miR-449a	7.50694e-07	4.35619e-07	-0.775125	1	1	0.0905126	0	0.0397278	0.15246	2.34247	0.133756	0.840745	1.21433	0	0	0	0
mmu-miR-450a-5p	8.7835e-16	1.47113e-07	27.3651	1	1	1.41138e-10	0	7.03895e-11	2.11325e-10	3.24541e-11	1.91427e-10	0	0.681167	0	0	0	0
mmu-miR-455*	7.59862e-06	6.38276e-06	-0.247564	1	1	33.1374	15.3638	3.30341	0.845727	12.2004	0.643352	10.7004	12.3009	2.91531	25.6463	20.7764	2.9989
mmu-miR-466a-3p/mmu-miR-466b-3p/mmu-miR-466c-3p/mmu-miR-466e-3p	9.86765e-07	8.7835e-16	-29.9757	1	1	4.29678	0	0.047198	0.191442	0.0200371	0.166596	0	0	0	0	0	0
mmu-miR-466g	2.13189e-06	2.45802e-06	0.460846	1	1	0.177579	0	0.0695711	11.7843	0.0284376	0.288379	3.99873	0.325433	1.45145	2.69598	0.766532	2.28646
mmu-miR-467e*	8.7835e-16	1.49443e-07	27.382	1	1	7.29499	0	3.11814	0.375508	0.0298479	0.314545	11.3801	1.79618	0.340042	13.6112	1.62357	3.01337
mmu-miR-467f	8.7835e-16	2.17822e-07	27.9339	1	1	1.41138e-10	0	7.03895e-11	2.11325e-10	3.24541e-11	1.91427e-10	0	0	1.09272	0	0	0
mmu-miR-483*	8.7835e-16	1.49443e-07	27.382	1	1	5.85218	6.7209	0.0968149	16.5908	3.69334	0.51656	1.92675	1.42199	0	2.73681	2.72715	0
mmu-miR-493	6.88812e-07	1.69498e-07	-2.0948	1	1	0.0847724	1.9342	0.0374998	0.14165	0.0161875	0.124552	1.01525	0	0	0	0	0
mmu-miR-494	2.90769e-06	2.33672e-06	-0.256938	1	1	9.74585	0	0.0780985	0.418525	2.45217	0.34748	3.58765	3.90722	0	1.29572	2.18273	0
mmu-miR-497	2.42242e-05	2.46868e-05	-0.00679738	1	1	22.9656	37.4576	11.1737	0.946344	36.4995	0.705361	15.6981	30.2817	6.28877	27.5804	30.8886	5.29337
mmu-miR-532-5p	8.50117e-05	8.39142e-05	-0.00561768	1	1	159.618	14.3914	22.258	170.377	11.0268	26.3017	129.972	20.8298	22.8814	178.328	19.6561	23.6551
mmu-miR-574-3p	5.03337e-06	4.22159e-06	-0.275364	1	1	5.67182	0	15.2224	0.568265	0.0359225	0.457488	0	0	9.80494	1.95527	1.64515	6.95162
mmu-miR-582-5p	2.26331e-06	1.61206e-06	-0.518733	1	1	5.02941	3.85017	0.0712638	0.356029	0.0290471	0.299431	1.52031	0.883684	0.371227	3.48619	1.2769	0
mmu-miR-615-3p	8.7835e-16	1.76344e-07	27.552	1	1	1.41138e-10	0	7.03895e-11	2.11325e-10	3.24541e-11	1.91427e-10	0	0	0	0	1.13153	0
mmu-miR-669h-5p	6.88812e-07	3.1759e-07	-1.16418	1	1	0.0847724	1.9342	0.0374998	0.14165	0.0161875	0.124552	0	0.535622	0	0	1.02912	0
mmu-miR-673-3p	1.35388e-06	8.81195e-07	-0.681273	1	1	0.136434	1.92387	0.0563392	0.245864	2.39615	0.21155	0	0.996984	0.731285	0	0.861334	1.56564
mmu-miR-676*	1.90407e-05	1.79279e-05	-0.122788	1	1	504.315	337.009	41.2089	533.104	409.462	56.724	294.553	353.055	55.283	523.661	473.677	42.0137
mmu-miR-696	8.7835e-16	1.76344e-07	27.552	1	1	1.41138e-10	0	7.03895e-11	2.11325e-10	3.24541e-11	1.91427e-10	0	0	0	0	1.13153	0
mmu-miR-702	8.7835e-16	2.17822e-07	27.9339	1	1	1.41138e-10	0	7.03895e-11	2.11325e-10	3.24541e-11	1.91427e-10	0	0	1.09272	0	0	0
mmu-miR-758	1.67569e-06	1.0138e-06	-0.778958	1	1	0.155352	1.92106	0.0626029	0.288388	3.57952	0.245961	0	1.59031	0.406323	1.36238	1.35578	0
mmu-miR-764-5p	8.7835e-16	1.47113e-07	27.3651	1	1	1.41138e-10	0	7.03895e-11	2.11325e-10	3.24541e-11	1.91427e-10	0	0.681167	0	0	0	0
mmu-miR-7a*	1.35565e-05	1.33078e-05	-0.0108322	1	1	240.174	79.6847	33.3145	238.444	53.6742	56.5846	971.879	318.784	103.768	849.662	279.813	93.2705
mmu-miR-872*	6.53656e-05	6.77077e-05	0.0566872	1	1	0.311515	27.8765	0.104118	0.784344	18.21	0.604153	9.86839	53.6482	2.65642	10.68	42.4492	2.99841
mmu-miR-93*	8.7835e-16	2.17822e-07	27.9339	1	1	77.9062	81.602	489.278	187.855	84.1447	499.073	71.0772	116.347	544.521	113.507	160.976	513.422
