# Supplementary material for: MicroRNA Expression Profiling Reveals MiRNA Families Regulating Specific Biological Pathways in Mouse Frontal Cortex and Hippocampus
Source: PLoS One. 2011 Jun 22;6(6):e21495. doi: 10.1371/journal.pone.0021495 (PMC3120887; doi:10.1371/journal.pone.0021495)
Supplement: Table S4 — Expression levels of miRNAs detected by microarrays. LogFC refers to the logarithmic fold change calculated as hippocampus over frontal cortex. P-value is given for differential expression. Expression values for each sample represent normalized log-transformed signal intensities. (XLSX) [file pone.0021495.s006.xlsx]

## Sheet: microarray
Supplemental Table S4. Expression levels of miRNAs detected by microarrays. LogFC refers to the logarithmic fold change calculated as hippocampus over frontal cortex. P-value is given for differential expression. Expression values for each sample represent normalized log-transformed signal intensities.
miRNA	logFC	P-value	FCx_rep1	FCx_rep2	FCx_rep3	HP_rep1	HP_rep2	HP_rep3
mmu-miR-193b	-2.28901	1.7e-05	7.90513	7.38153	7.30152	5.3853	5.34983	4.98601
mmu-miR-551b	2.14448	0.000239754	3.42248	4.15818	4.7258	6.34821	6.34408	6.0476
mmu-miR-182	-3.65301	0.000350355	4.89798	6.84324	4.65384	1.62069	2.56122	1.25411
mmu-miR-34c-star	2.70065	0.000410916	3.10807	4.39069	2.41157	5.99182	6.06689	5.95358
mmu-miR-34a	-1.65382	0.00113011	7.52508	7.34515	7.74224	6.23177	6.26377	5.15547
mmu-miR-34c	3.07679	0.00133658	4.92151	4.96686	2.48447	6.91998	7.3857	7.29753
mmu-miR-132	-1.00014	0.00177794	11.6975	11.8606	11.5851	10.9671	10.4616	10.7142
mmu-miR-467b-star	-1.38592	0.00179658	4.06627	3.92269	3.60524	2.31399	3.06178	2.06068
mmu-miR-146a	-1.20569	0.00201584	5.0836	5.24479	5.00379	3.70619	4.4218	3.5871
mmu-miR-17-star	1.1743	0.00240959	3.31776	3.02219	3.40523	4.58364	3.93872	4.74572
mmu-miR-128	-0.959573	0.00384184	11.3254	10.7568	11.2659	10.0749	10.3839	10.0105
mmu-miR-383	-1.00407	0.00436819	8.05067	8.47301	7.8683	7.44823	6.86312	7.06842
mmu-miR-92b	0.735023	0.00440278	6.51607	6.40984	6.65428	7.25201	7.29675	7.23649
mmu-miR-448	1.32422	0.00452347	0.940058	1.28236	1.10101	3.1404	1.84121	2.31446
mmu-miR-495	-0.88256	0.00460078	5.08973	4.81525	4.76922	3.94473	4.31279	3.76899
mmu-miR-200b	-1.31232	0.00504447	2.05015	3.21615	2.33423	1.47214	1.33948	0.851958
mmu-miR-429	-1.51801	0.00528338	3.71906	4.31278	2.68236	2.09723	2.20781	1.85512
mmu-miR-99a	0.76752	0.0055361	8.25392	8.00136	8.40088	8.87468	9.09305	8.99098
mmu-miR-223	-0.953883	0.00554616	2.59245	2.56491	2.62453	1.25645	1.57057	2.09322
mmu-miR-200c	-3.23763	0.00563372	4.11112	6.21174	2.24523	1.18502	0.898882	0.771299
mmu-miR-218-2-star	0.709618	0.00688582	2.66512	2.62492	2.90716	3.57044	3.35125	3.40437
mmu-miR-425-star	1.46625	0.00723144	2.96863	1.45435	2.73804	3.92131	4.12117	3.51729
mmu-miR-34b-3p	2.10734	0.007307	4.0225	2.76564	1.50291	4.50369	5.34028	4.7691
mmu-miR-204	1.77489	0.0103905	3.01165	1.66798	1.46807	3.57817	4.76128	3.13294
mmu-miR-130a	0.702301	0.0110532	5.74899	5.56633	5.31364	6.05086	6.33689	6.34812
mmu-miR-762	1.402	0.0118955	3.96228	2.97092	4.61261	4.866	5.72034	5.16547
mmu-miR-874	0.801161	0.0121007	6.23559	5.50591	5.70829	6.50606	6.79528	6.55193
mmu-miR-375	0.965202	0.0124449	1.51322	1.83103	2.46923	3.02802	2.55891	3.12215
mmu-let-7a-star	-0.640123	0.0124856	1.49127	1.46008	1.63487	0.878517	0.705969	1.08136
mmu-miR-200a	-1.88298	0.012671	3.85141	4.42	2.06855	1.05187	1.56337	2.07577
mmu-miR-212	-0.631639	0.0134987	8.87358	9.06728	8.78622	8.45887	8.17967	8.19364
mmu-miR-21	0.972369	0.0138349	1.48687	1.43524	1.35577	2.73821	2.74642	1.71035
mmu-miR-592	-1.45804	0.0140392	3.18793	1.39132	2.97361	1.0895	1.32085	0.76839
mmu-miR-494	-0.834676	0.0143564	6.02502	5.44058	6.30883	5.25846	5.08751	4.92442
mmu-miR-804	0.793937	0.0153797	0.941641	1.47618	1.03271	2.32638	1.68111	1.82486
mmu-miR-324-5p	0.603468	0.0162457	6.83629	6.89205	7.14332	7.41928	7.66666	7.59613
mmu-miR-666-5p	1.66378	0.016807	2.49843	4.80879	3.13849	5.5003	5.11239	4.82435
mmu-miR-20b	-0.84782	0.0169943	2.22897	2.10895	2.93851	1.34997	1.52209	1.86091
mmu-miR-154-star	-0.682774	0.0170128	2.09322	2.4903	2.61102	1.49103	1.82006	1.83514
mmu-miR-665	-0.548381	0.0174365	6.31139	6.28309	6.26053	5.63623	5.74382	5.82982
mmu-miR-335-5p	-1.6006	0.0178875	3.44142	2.79141	4.55976	1.41465	1.65535	2.92081
mmu-miR-715	-0.815805	0.0178912	2.50523	2.57767	3.2185	1.90414	2.2736	1.67623
mmu-miR-141	-0.809261	0.0189693	2.2086	1.97886	1.2766	0.944881	0.944678	1.14672
mmu-miR-146b	-0.699745	0.0199398	3.56796	3.6697	3.9599	3.36288	2.70843	3.02702
mmu-miR-490	-1.0505	0.0213036	2.71658	3.92334	3.47675	2.6575	2.50848	1.79919
mmu-miR-24-2-star	-1.05142	0.023126	5.54401	5.68309	4.78812	4.38869	4.84768	3.62458
mmu-miR-871	-0.541951	0.0232696	1.73417	1.53603	1.52128	0.924656	1.1902	1.05076
mmu-miR-674-star	-0.804782	0.0256477	6.23143	5.99056	6.40314	5.78929	5.60321	4.81828
mmu-miR-129-5p	-1.03102	0.0259683	6.33865	5.36804	6.2243	4.27122	5.34271	5.224
mmu-miR-669j	0.548651	0.0276799	0.672862	0.799007	0.625823	1.02416	1.25862	1.46088
mmu-miR-491	0.590223	0.030894	5.45354	6.02912	5.67178	6.16377	6.29211	6.46923
mmu-miR-770-3p	0.647825	0.0346954	5.6458	6.04055	5.28154	6.51479	6.09706	6.29952
mmu-miR-708-star	0.535422	0.0351094	1.29147	1.45527	1.67923	2.14231	1.7967	2.09322
mmu-miR-423-5p	0.932071	0.0351331	2.95243	3.73978	2.662	4.64058	3.6397	3.87013
mmu-miR-30a-star	-0.840348	0.0352516	5.45737	4.99338	4.79339	3.69599	4.83722	4.18988
mmu-miR-384-5p	-0.746176	0.0368052	3.2663	2.49822	3.5229	2.14412	2.36969	2.53508
mmu-miR-370	0.501682	0.0371805	5.86228	6.29208	6.02316	6.56216	6.52085	6.59955
mmu-miR-466e-3p	0.799038	0.0380056	2.03721	1.51207	0.9491	2.0526	2.16697	2.67592
mmu-miR-202-5p	0.561563	0.0380749	0.722123	1.24106	0.820124	1.46807	1.31645	1.68347
mmu-miR-148a	-0.559952	0.0384203	1.77951	1.17244	1.29727	0.941616	0.774909	0.852844
mmu-miR-330-star	0.56043	0.0385561	7.48985	7.99911	7.42275	8.21266	8.08407	8.29626
mmu-miR-129-3p	-0.662308	0.0395188	7.84407	7.32176	7.89795	6.88771	7.43469	6.75446
mmu-miR-672	0.839936	0.040861	5.43523	6.29513	5.2782	6.96134	6.08326	6.48377
mmu-miR-145	-0.508715	0.0419298	9.27022	9.06548	9.38605	8.69628	8.95759	8.54174
mmu-miR-133b	-0.660764	0.0423037	2.68986	2.22504	3.10163	2.16654	1.74937	2.11833
mmu-miR-676	0.453858	0.0464793	6.52229	6.73686	6.40836	7.05025	7.03296	6.94588
mmu-miR-344	-0.459442	0.0482451	7.52363	7.13668	7.29948	6.80965	6.9172	6.85462
mmu-miR-135b	-0.474788	0.0485586	1.55838	1.36621	1.42697	0.764396	0.96595	1.19684
mmu-miR-666-3p	0.624222	0.0486121	3.32485	2.56605	3.31493	3.46694	3.7743	3.83727
mmu-miR-877	0.791977	0.0492767	2.4957	2.81695	2.21131	3.49641	2.60015	3.80333
mmu-miR-345-3p	0.900843	0.0502871	2.97458	4.23255	3.80969	5.08633	4.59888	4.03413
mmu-miR-298	0.505094	0.0526923	5.46507	5.49683	5.21502	6.19136	5.64308	5.85776
mmu-miR-431-star	0.522717	0.0528465	4.23983	4.75096	4.8288	5.09593	5.2775	5.01431
mmu-miR-421	0.706237	0.0545856	4.57986	3.56049	4.10995	5.17097	4.69472	4.50333
mmu-miR-297b-3p	-0.539176	0.0548026	1.43204	1.92757	2.04182	1.34273	1.02982	1.41134
mmu-miR-130b-star	0.637946	0.0573448	0.850179	1.14637	1.58903	1.40336	1.93758	2.15847
mmu-miR-487b	0.438751	0.0573572	8.45575	8.68883	8.41115	8.849	8.90644	9.11655
mmu-miR-99b	0.528293	0.0597812	8.94948	9.55462	8.89196	9.71696	9.52008	9.7439
mmu-miR-296-5p	-0.640063	0.0609572	2.75856	2.9825	2.9133	2.77938	2.2635	1.6913
mmu-miR-29b-star	-0.561349	0.0644444	1.28077	1.61976	2.17692	1.16222	1.05381	1.17737
mmu-miR-883b-5p	0.472098	0.065029	1.27702	1.04018	0.881067	1.39905	1.81449	1.40102
mmu-miR-705	-0.49954	0.0651868	6.4697	5.97006	5.97853	5.70545	5.39393	5.82029
mmu-miR-140-star	0.568619	0.0673073	7.0253	7.51144	6.71751	7.95276	7.45209	7.55525
mmu-miR-93	0.541526	0.0673946	7.04839	7.49627	6.74778	7.86102	7.41195	7.64404
mmu-miR-547	0.467246	0.0684137	1.24834	0.928627	1.26024	1.74617	1.77255	1.32023
mmu-miR-152	0.819231	0.0700858	4.47647	4.72547	3.37437	5.41384	4.57804	5.04212
mmu-miR-7a	0.998436	0.0708173	1.91375	2.44975	1.68534	1.9346	3.86302	3.24653
mmu-miR-466h	0.490117	0.0745737	1.43368	1.52841	1.43106	1.56345	2.31472	1.98535
mmu-miR-411-star	-1.17548	0.0754011	4.8004	2.98899	4.93772	3.04351	3.79742	2.35977
mmu-miR-296-3p	1.39699	0.0764501	2.71313	3.32415	1.93051	4.64152	2.43541	5.08183
mmu-miR-199b	0.514186	0.0768448	1.33854	1.53165	1.19301	2.26276	1.86912	1.47388
mmu-miR-292-5p	-0.381775	0.0778159	1.51318	1.49738	1.34565	1.16445	0.93658	1.10986
mmu-miR-503-star	-0.507626	0.0786822	1.40125	1.37443	2.06779	1.29283	1.03427	0.993498
mmu-miR-103	0.592849	0.0791375	10.4589	11.2795	10.5411	11.5674	10.9719	11.5188
mmu-miR-139-5p	-0.387465	0.0794253	9.77727	9.5919	9.49634	9.16208	9.18544	9.3556
mmu-miR-1198	-0.402737	0.0801111	5.98924	5.86565	6.09233	5.7545	5.37391	5.6106
mmu-miR-712-star	-0.894315	0.0826087	3.5505	2.87718	2.68888	2.65701	1.13174	2.64487
mmu-miR-297c	0.615071	0.082917	1.4729	0.738034	0.593554	1.24883	1.97851	1.42235
mmu-miR-1195	-0.671188	0.0830048	9.32866	8.54841	9.88814	8.52179	8.7448	8.48505
mmu-miR-466i	-0.822814	0.0830917	4.81872	4.34653	4.3363	3.53117	4.59303	2.9089
mmu-miR-127	0.425569	0.0830921	10.736	11.108	10.6277	11.358	11.093	11.2975
mmu-miR-425	0.392598	0.0838797	6.5514	6.21759	6.28804	6.78522	6.83836	6.61125
mmu-miR-674	-0.376356	0.0857686	9.03394	9.23221	8.89817	8.725	8.66455	8.64571
mmu-miR-880	0.538273	0.0863069	0.698524	0.753512	0.870173	1.56793	0.743942	1.62516
mmu-miR-467f	-0.827031	0.086991	2.98367	3.07362	3.34598	2.76663	1.27274	2.8828
mmu-miR-28	0.679862	0.0885645	3.26489	2.37235	3.15137	4.07283	3.7268	3.02857
mmu-miR-206	-0.533306	0.0891256	2.60045	2.44771	1.86129	2.13205	1.55048	1.627
mmu-miR-297a-star	-0.625564	0.0896028	2.19501	1.88457	1.10877	0.924891	1.47535	0.911425
mmu-miR-468	0.488173	0.0914667	1.19383	2.01338	1.72148	2.11395	2.26529	2.01397
mmu-miR-361	0.450708	0.0920443	8.10974	8.60393	8.00701	8.82026	8.48074	8.77179
mmu-miR-876-5p	-0.467404	0.093281	1.54366	1.47406	1.17226	1.33322	0.694105	0.760437
mmu-miR-467d-star	-0.496854	0.0953412	3.10169	3.2843	2.43955	2.36741	2.58734	2.38022
mmu-miR-17	0.379058	0.0956168	6.21829	6.60983	6.46291	6.85617	6.87814	6.69389
mmu-miR-329	-0.394051	0.0976377	5.83795	5.46594	5.82193	5.23576	5.50379	5.20412
mmu-miR-124	-0.366468	0.0993536	13.1599	13.0418	13.1492	12.6294	12.9686	12.6535
mmu-miR-191	0.440747	0.101035	10.1872	10.6638	10.0352	10.8612	10.523	10.8243
mmu-miR-339-3p	0.346789	0.101315	1.52069	1.30265	1.33755	1.73627	1.81096	1.65402
mmu-miR-20b-star	0.405982	0.103929	0.700283	0.970933	0.832897	1.44579	1.35934	0.916924
mmu-miR-221	0.33888	0.104033	9.75496	9.81025	9.78247	10.0598	10.0478	10.2567
mmu-miR-33-star	-0.451002	0.104125	1.6543	1.19759	1.68032	0.765699	1.04589	1.36762
mmu-miR-320	0.685227	0.10428	6.87919	8.18679	7.18554	8.40105	7.66876	8.23739
mmu-miR-9	-0.955415	0.104745	5.16286	4.36831	3.8404	4.1999	2.40288	3.90255
mmu-miR-222	0.346833	0.105022	10.5677	10.5004	10.633	10.7711	11.059	10.9115
mmu-miR-466a-5p	0.520338	0.105286	0.843999	0.761603	1.56624	1.90018	1.50581	1.32687
mmu-miR-28-star	0.861132	0.105984	1.89316	2.55363	1.143	3.16203	3.17561	1.83554
mmu-miR-877-star	-0.417177	0.106168	2.33707	2.36591	2.6865	1.72343	2.26438	2.15013
mmu-miR-107	0.432483	0.106711	10.5262	10.9449	10.3935	11.1927	10.7722	11.1972
mmu-miR-532-3p	-0.420811	0.107028	5.34986	5.252	4.83899	4.74375	4.94572	4.48896
mmu-miR-125b-3p	0.852431	0.107502	3.97996	5.09533	3.10521	4.89215	4.63506	5.21058
mmu-miR-34b-5p	0.648594	0.108098	0.984104	0.961962	0.938319	1.62069	0.862555	2.34692
mmu-miR-615-5p	0.572083	0.109176	1.49975	1.36976	2.46415	2.42406	2.13483	2.49101
mmu-miR-141-star	0.412326	0.109248	1.83901	2.07511	1.47724	2.08977	2.13999	2.39859
mmu-let-7f-star	-0.48698	0.109453	1.66754	1.40894	1.86684	0.924891	1.65535	0.90214
mmu-miR-449b	0.428039	0.109911	1.39206	1.15018	1.00578	1.96155	1.32449	1.54611
mmu-miR-496	-0.752677	0.109913	2.53724	1.00106	1.13237	0.45991	1.03036	0.922364
mmu-miR-183	-1.14377	0.110237	2.63161	4.27491	1.68032	1.10013	2.36969	1.6857
mmu-miR-501-3p	0.860287	0.110442	2.61379	4.15292	2.35859	3.43488	4.28027	3.99099
mmu-miR-293-star	-0.536836	0.112096	1.79233	0.924599	0.748286	0.497466	0.571576	0.785666
mmu-miR-691	-0.668245	0.117583	2.48876	2.69533	3.02527	2.74311	1.24963	2.21189
mmu-miR-466f	0.811793	0.119365	0.71374	2.6542	1.11191	2.35981	2.30179	2.25363
mmu-miR-685	-0.408921	0.121525	6.18959	6.08507	6.75493	6.01504	5.84134	5.94645
mmu-miR-879-star	-0.440986	0.122416	1.34367	1.43776	1.99504	0.920986	1.4324	1.10013
mmu-miR-126-3p	-0.413915	0.122549	8.59608	8.0214	8.12478	7.83352	8.06496	7.60203
mmu-miR-193-star	0.703925	0.126682	1.06358	2.72407	1.58366	2.30769	2.79582	2.37958
mmu-miR-704	0.354035	0.128342	1.87938	1.54958	1.43805	2.00489	1.83919	2.08504
mmu-miR-29a-star	-0.361816	0.130927	1.70872	1.26651	1.22847	0.990775	0.96146	1.16601
mmu-miR-467e	0.534493	0.131316	1.628	1.45199	0.93649	2.46386	1.50581	1.65029
mmu-miR-511	0.453196	0.134977	1.06486	0.604114	0.669205	1.68017	0.832949	1.18465
mmu-miR-351	0.371914	0.13643	4.54774	4.80027	4.15532	4.87847	4.82492	4.91568
mmu-miR-122	0.606855	0.136911	1.91956	1.79233	1.38311	2.7544	1.48259	2.67858
mmu-miR-346	0.377762	0.140078	7.04538	7.67775	7.34132	7.84558	7.79246	7.5597
mmu-miR-542-3p	0.377902	0.140377	0.794505	0.685471	1.05838	1.00942	1.1018	1.56085
mmu-miR-144	0.382236	0.141981	0.991981	1.13101	0.846325	1.7532	1.24963	1.1132
mmu-miR-669d	0.361596	0.142249	0.826925	0.966073	0.839138	1.49081	1.3319	0.894217
mmu-miR-467b	0.378383	0.14326	1.34535	1.27133	1.02189	1.41667	1.95837	1.39867
mmu-miR-190b	0.407798	0.146477	0.618181	1.13591	1.04806	1.65647	0.995911	1.37316
mmu-miR-338-3p	-0.332228	0.147669	2.17962	2.07534	2.48012	1.88649	2.0688	1.78311
mmu-miR-9-star	-0.440038	0.149908	7.46118	6.59015	7.25476	6.6875	6.86717	6.43131
mmu-miR-378	0.314525	0.156903	6.96085	7.3114	6.89597	7.33695	7.41084	7.364
mmu-miR-194	0.487351	0.161136	4.61116	5.44566	5.70915	5.79955	5.47569	5.95278
mmu-miR-764-3p	-0.62272	0.165764	1.984	2.55204	2.47529	0.998548	2.61188	1.53275
mmu-miR-380-3p	0.514979	0.167098	1.10956	1.33171	1.6857	1.65547	1.41755	2.59889
mmu-miR-142-3p	0.353955	0.167171	0.99994	1.23867	1.12285	1.13877	1.46648	1.81808
mmu-miR-143	-0.370096	0.169579	8.37839	8.03387	8.43701	7.88157	8.26739	7.59003
mmu-miR-805	-0.491387	0.171042	8.01264	7.67502	8.58834	7.29496	8.13494	7.37193
mmu-miR-363	-0.323864	0.171252	1.98128	1.75318	1.88216	1.47511	1.84553	1.32438
mmu-miR-20a-star	-0.558957	0.173436	1.30626	0.935474	2.42728	0.880908	0.99011	1.12112
mmu-miR-469	-0.329976	0.176019	1.27535	1.25007	1.3004	1.27593	0.640522	0.919444
mmu-miR-299	-0.422081	0.178564	2.33955	3.1438	2.33095	2.15121	1.93624	2.4606
mmu-miR-150	-0.318195	0.180255	7.49194	7.16069	7.52868	6.83316	7.25155	7.14201
mmu-miR-541	0.295179	0.180957	8.69716	8.93755	8.81772	9.30727	8.92151	9.10919
mmu-miR-133a	-0.407818	0.182901	2.98923	2.26963	3.19584	2.44807	2.22181	2.56137
mmu-miR-126-5p	0.360572	0.183713	1.07481	0.718808	1.41183	1.27052	1.6857	1.33094
mmu-miR-669a	0.375103	0.184142	0.791866	1.19787	0.725592	1.44863	1.53272	0.85929
mmu-miR-181c	0.430698	0.185186	6.09551	5.98368	5.12827	6.32495	5.92982	6.24478
mmu-miR-698	-0.596546	0.185674	1.35045	1.73416	2.91727	1.49082	1.02083	1.70059
mmu-miR-323-5p	0.585535	0.186077	2.28119	3.36388	3.60599	3.68864	3.15282	4.1662
mmu-miR-497	0.44594	0.186454	6.37283	5.67447	5.25612	5.97369	6.37656	6.29099
mmu-miR-582-3p	-0.390077	0.188246	1.33534	1.79233	2.12895	1.22048	1.17618	1.68974
mmu-miR-100	0.263369	0.189989	7.63306	7.57236	7.49705	7.75289	7.93318	7.80651
mmu-miR-302a	-0.359122	0.190532	0.891802	1.43579	1.6546	0.791667	1.00942	1.10373
mmu-miR-215	-0.370432	0.190933	1.68332	0.948739	0.902782	0.694921	0.816612	0.912018
mmu-miR-343	0.341313	0.193828	0.822905	1.08488	1.0489	1.45128	0.920008	1.60933
mmu-miR-150-star	-0.357817	0.194748	1.79338	1.99157	1.30475	1.19594	1.19875	1.62156
mmu-miR-7b	-0.309939	0.196989	1.42789	0.892216	0.959492	0.753284	0.692478	0.904016
mmu-miR-879	0.301048	0.197084	1.27828	1.22547	1.5925	1.50734	1.59396	1.89809
mmu-miR-675-3p	0.295238	0.197866	0.843999	0.819761	1.22805	1.37115	1.30624	1.10013
mmu-miR-218-1-star	-0.385627	0.19801	1.23221	1.98855	1.73518	1.21138	0.97712	1.61056
mmu-let-7b-star	0.406629	0.198174	1.88364	1.78738	1.53362	1.67558	2.69668	2.05227
mmu-miR-125a-3p	0.649259	0.198235	3.81417	4.7469	2.90748	4.45973	4.03589	4.92071
mmu-miR-669h-3p	-0.429803	0.198764	1.05807	1.86906	1.63027	1.57544	0.924598	0.767956
mmu-miR-532-5p	0.315842	0.201329	6.25147	6.54271	5.97368	6.58552	6.38381	6.74605
mmu-miR-33	-0.413226	0.203843	1.29147	1.04016	1.7272	1.43633	0.538816	0.843999
mmu-miR-1224	0.562075	0.210607	4.6932	3.33232	3.97127	3.93031	5.05356	4.69914
mmu-miR-30c	-0.314512	0.211332	10.0649	9.41553	9.96854	9.49947	9.56037	9.4456
mmu-miR-10b	0.297847	0.212764	1.54366	1.44149	1.08184	1.84564	1.65715	1.45773
mmu-miR-540-5p	0.252524	0.214767	2.33115	2.35866	2.38779	2.54561	2.77401	2.51556
mmu-miR-30c-1-star	0.487069	0.22154	2.05794	2.95385	1.46295	2.49604	2.61683	2.82308
mmu-miR-466f-5p	0.645188	0.222391	0.874313	2.90955	1.92894	2.44585	2.2362	2.96632
mmu-miR-509-5p	0.269661	0.222744	1.21163	1.12638	1.05285	1.54155	1.13814	1.52016
mmu-miR-671-5p	0.441604	0.223696	4.39503	4.94496	3.86176	5.20908	4.40232	4.91516
mmu-miR-690	-0.379905	0.225768	10.9052	10.2635	11.262	10.2967	10.6677	10.3266
mmu-miR-434-3p	-0.372865	0.227333	8.77818	8.05178	8.94386	8.02639	8.49214	8.1367
mmu-miR-185	0.2794	0.229095	9.26169	9.66882	9.21541	9.76142	9.49574	9.72696
mmu-miR-694	-0.311181	0.231269	1.31481	1.07171	0.684824	0.637574	0.539194	0.961032
mmu-miR-669g	0.258811	0.231352	0.990493	0.662568	1.00114	1.143	1.03801	1.24963
mmu-miR-21-star	-0.276061	0.233225	1.64404	2.02905	2.04956	1.82657	1.49927	1.56863
mmu-miR-382	0.25538	0.23531	8.18856	8.35043	8.19723	8.27937	8.57465	8.64834
mmu-miR-331-3p	-0.472875	0.235434	4.3527	3.91475	5.1293	3.86784	3.60154	4.50874
mmu-let-7g-star	-0.376426	0.235532	3.05256	2.27987	2.8292	1.91859	2.69122	2.42254
mmu-miR-669f	-0.309652	0.239516	1.72931	1.46807	2.08585	1.72441	1.40003	1.22983
mmu-miR-19a	0.307008	0.241548	0.82841	0.999025	0.880913	0.76768	1.48067	1.38103
mmu-miR-181d	0.234317	0.24417	6.41314	6.49842	6.46415	6.78468	6.54426	6.74973
mmu-miR-154	-0.29524	0.246448	6.49511	5.95292	6.43042	6.01865	6.21191	5.76217
mmu-miR-101a	0.342469	0.247859	0.94337	1.53188	1.05772	1.1351	1.50581	1.91948
mmu-miR-380-5p	0.431134	0.24897	2.53179	2.81085	3.33212	3.22482	2.79315	3.95019
mmu-miR-24-1-star	-0.40328	0.249373	2.33625	2.19497	1.97886	1.21095	2.44226	1.64702
mmu-miR-412	0.317102	0.249946	1.63525	1.41362	0.882752	1.65355	1.40633	1.82305
mmu-miR-187	0.369295	0.255527	7.49018	6.99628	6.36286	7.20189	7.47716	7.27816
mmu-let-7g	-0.376971	0.256104	8.04624	7.08366	7.82224	6.9234	7.31848	7.57935
mmu-miR-134	0.524913	0.256109	4.66317	6.14405	4.74042	6.17255	5.35261	5.59721
mmu-miR-196a-star	0.269115	0.256352	0.699182	0.561888	0.848643	1.18507	1.07244	0.659543
mmu-miR-881-star	-0.325648	0.257343	1.03928	0.801802	1.66498	1.0382	0.737635	0.753284
mmu-miR-93-star	0.829279	0.26014	2.43135	3.65214	3.20654	4.36618	2.30329	5.1084
mmu-miR-297a	0.394641	0.261356	1.18556	1.45681	1.17814	1.85609	2.18864	0.959699
mmu-miR-433	0.367726	0.261681	8.09517	8.84523	8.16825	9.10381	8.27463	8.83338
mmu-let-7b	0.345965	0.264167	12.125	13.0671	12.6088	13.1606	12.6442	13.034
mmu-miR-376b-star	0.232229	0.265374	1.0055	1.03083	1.09688	1.24963	1.47004	1.11022
mmu-miR-669e	0.350408	0.265794	1.23181	0.929007	0.727582	1.861	0.895167	1.18346
mmu-miR-883b-3p	0.354292	0.266881	1.37268	1.27541	1.37706	1.46492	1.28212	2.34099
mmu-miR-683	0.361195	0.266991	1.51948	1.49057	1.31096	2.26117	1.98705	1.15638
mmu-miR-130b	-0.74385	0.272938	3.51826	4.16281	2.2692	3.64559	2.59395	1.47918
mmu-miR-27a-star	0.300884	0.274421	1.17589	1.27254	1.84396	1.89723	1.86118	1.43663
mmu-miR-470-star	-0.30965	0.274552	1.44996	1.12195	1.05576	0.803262	0.539194	1.35626
mmu-miR-300-star	0.31771	0.275069	1.01282	1.53202	0.986123	1.89528	1.45353	1.13528
mmu-miR-466g	-0.769542	0.275529	4.31606	3.68934	1.87803	2.62472	1.65095	3.29914
mmu-miR-720	-0.493303	0.277813	2.5602	2.14963	3.28984	1.35306	2.66995	2.49675
mmu-miR-27a	-0.34546	0.27923	7.30982	6.78853	7.51981	6.48905	7.33108	6.76164
mmu-miR-193	-0.374116	0.280199	1.97886	1.68211	2.88113	1.82695	1.95796	1.63483
mmu-miR-882	0.276285	0.283655	0.928873	0.730192	0.511578	0.831232	0.791489	1.37678
mmu-miR-136	0.302176	0.288255	1.29559	0.950052	1.34533	1.03651	1.60151	1.85949
mmu-miR-365	-0.341326	0.290612	2.34948	1.37158	2.04082	1.40447	1.40714	1.9263
mmu-miR-302b	0.293891	0.290711	0.616627	1.38909	0.978472	1.21194	1.09858	1.55535
mmu-miR-712	0.36682	0.29165	1.42341	1.27541	2.16534	1.6403	1.83752	2.4868
mmu-miR-186-star	-0.299252	0.293001	1.072	0.788318	1.5459	0.572823	0.807376	1.12827
mmu-miR-199a-5p	0.256624	0.294365	1.33155	1.7661	1.6571	2.05462	1.55052	1.91948
mmu-miR-200b-star	-0.572675	0.296419	1.80996	3.45302	1.38044	1.7325	1.94188	1.25101
mmu-miR-98	0.218163	0.296916	3.82398	3.99652	3.99362	4.09323	4.02618	4.34921
mmu-miR-106b-star	-0.562646	0.296948	4.8189	4.8155	3.72821	4.92433	3.65469	3.09565
mmu-miR-26b-star	-0.342099	0.297345	1.85616	0.706189	1.33543	0.834743	0.89318	1.14356
mmu-miR-409-3p	0.26452	0.299899	6.45401	6.72251	6.2825	7.07939	6.46143	6.71175
mmu-miR-15b	0.403571	0.300267	4.79857	4.1053	3.8222	4.34843	4.28379	5.30457
mmu-miR-188-5p	-0.407677	0.304213	2.31918	2.78134	2.37594	1.66907	2.93666	1.64771
mmu-miR-23a	-0.208986	0.304478	9.88808	10.0674	9.74512	9.64506	9.71708	9.71154
mmu-miR-181b	0.213217	0.306274	8.9827	9.07216	8.92848	9.41417	9.12983	9.07899
mmu-miR-23b	0.208143	0.306642	11.0304	11.2249	10.8997	11.2484	11.2992	11.2317
mmu-miR-219	-0.222565	0.308313	1.34792	0.964926	0.992037	0.885404	0.758282	0.993498
mmu-miR-18a	0.565094	0.308462	2.2284	2.80632	1.6546	2.57749	3.90155	1.90556
mmu-miR-654-3p	-0.220671	0.309443	1.1215	1.5769	1.40166	1.08723	1.13919	1.21163
mmu-miR-125b-star	-0.261522	0.309882	4.5264	4.04793	4.29048	4.36337	3.96171	3.75516
mmu-miR-139-3p	-0.297083	0.310949	6.37311	6.74023	6.24908	6.57459	5.71269	6.18388
mmu-miR-200a-star	-0.233674	0.311155	1.32846	1.65858	1.07439	1.07889	1.15733	1.12419
mmu-miR-124-star	-0.24474	0.313572	5.04557	5.61647	5.64665	5.15008	5.19194	5.23245
mmu-miR-653	-0.23258	0.31501	1.28334	1.4509	1.36424	1.03398	0.909608	1.45715
mmu-miR-377	0.298272	0.319975	1.29147	1.52306	1.30749	2.09739	1.8067	1.11274
mmu-miR-190	0.261532	0.323302	1.14528	0.846804	1.08526	1.46807	1.54882	0.845044
mmu-miR-29c	-0.65491	0.324929	5.6541	4.1809	5.03826	5.00195	5.01866	2.88792
mmu-miR-205	-0.260798	0.326154	1.52475	1.38469	0.816136	1.11506	0.76768	1.06043
mmu-miR-455-star	0.261132	0.32872	1.54366	0.875129	1.23219	1.18286	1.56744	1.68407
mmu-miR-101b	-0.30614	0.328749	2.56274	2.84236	2.63365	2.26627	2.96174	1.89232
mmu-miR-574-5p	-0.205152	0.330368	5.87402	5.61393	5.80508	5.48476	5.44779	5.74502
mmu-miR-433-star	0.369885	0.332712	1.29147	2.03674	0.979655	1.35626	1.69968	2.36157
mmu-miR-1192	-0.48152	0.333013	3.32529	2.55068	3.2976	3.60883	2.33625	1.78393
mmu-miR-294	-0.204988	0.334999	1.20532	0.948282	1.07439	0.887516	1.04145	0.684062
mmu-miR-455	-0.247471	0.335494	5.29677	5.4538	5.3214	5.30484	4.66863	5.35608
mmu-miR-483-star	-0.326705	0.336993	2.97881	2.58322	3.13849	2.81893	2.97838	1.92309
mmu-miR-302d	0.334673	0.338661	1.5137	1.17179	1.28665	0.924891	1.95804	2.09322
mmu-miR-322	0.21779	0.338901	0.927186	0.912517	1.23676	1.47219	1.03036	1.22728
mmu-miR-324-3p	-0.251069	0.339017	5.41338	5.21196	5.43003	5.0524	5.51532	4.73444
mmu-miR-872	-0.27753	0.345019	1.71893	1.27541	1.69316	1.17175	0.910204	1.77295
mmu-miR-374	0.210633	0.348023	1.49788	1.12311	1.21777	1.4107	1.71138	1.34857
mmu-miR-31	-0.307917	0.348315	7.40736	7.94829	7.25622	7.35583	6.69482	7.63747
mmu-miR-696	0.312009	0.349472	0.806203	1.06205	1.24963	1.92715	0.770498	1.35626
mmu-miR-216a	-0.269464	0.351716	1.28745	1.01412	1.54279	0.684693	0.867853	1.48341
mmu-miR-465c-5p	-0.270425	0.354211	1.45033	0.814965	1.58638	0.69165	1.24862	1.10013
mmu-miR-466b-3p	-0.254212	0.354254	1.84526	0.970933	1.49181	1.07439	1.21503	1.25595
mmu-miR-19b	-0.209293	0.360522	5.47609	5.53819	5.0391	5.21926	5.19357	5.01267
mmu-miR-297c-star	-0.290342	0.361804	2.26636	1.44298	1.34022	1.54279	1.07058	1.56517
mmu-miR-543	-0.232663	0.36341	4.7305	4.58324	5.17173	4.33203	4.64002	4.81543
mmu-let-7c	0.184742	0.363968	12.9406	12.6952	12.9406	12.9406	13.1499	13.0401
mmu-miR-323-3p	0.419823	0.365879	2.04525	2.83566	1.42362	1.84227	2.59499	3.12673
mmu-miR-434-5p	-0.222644	0.367732	6.46914	6.09959	6.51703	5.81446	6.29005	6.31332
mmu-miR-340-5p	0.194622	0.368262	1.47265	1.03132	1.37301	1.45028	1.56895	1.44162
mmu-miR-133a-star	0.217019	0.36895	0.727973	1.08847	1.19167	0.993498	1.4738	1.19188
mmu-miR-147	0.227463	0.369449	1.09128	1.36301	0.715785	1.07439	1.29466	1.48341
mmu-miR-431	-0.279263	0.373409	5.2065	5.3389	4.71938	4.39449	4.72148	5.31102
mmu-miR-466d-3p	-0.318569	0.376302	1.54843	1.0579	2.21256	1.10612	1.03036	1.72671
mmu-miR-744-star	-0.358806	0.388543	2.17416	2.70825	1.89356	1.51058	2.74349	1.44549
mmu-miR-681	-0.222878	0.390215	1.42235	1.37435	1.65028	1.35089	1.58345	0.843999
mmu-miR-290-3p	0.190607	0.390889	1.69701	2.0475	2.21297	2.10955	2.22425	2.1955
mmu-miR-876-3p	-0.183091	0.393915	1.37017	1.5535	1.19675	1.25714	1.01063	1.30339
mmu-miR-341	-0.479865	0.393945	2.39959	3.42752	4.66328	3.16805	2.56548	3.31726
mmu-miR-31-star	0.311036	0.394149	2.06632	1.54055	1.42036	2.65744	1.86916	1.43374
mmu-miR-540-3p	0.232616	0.39444	4.26831	4.18879	4.34312	4.63864	4.85638	4.00305
mmu-miR-384-3p	0.225391	0.395369	0.941641	0.699562	0.823855	0.946183	1.49549	0.699562
mmu-miR-295	0.216274	0.396037	0.884477	1.27541	1.353	1.29653	1.143	1.72218
mmu-miR-802	0.245568	0.396551	1.87308	1.26334	1.52669	1.43834	2.22306	1.73842
mmu-miR-878-5p	-0.252192	0.396815	2.61157	2.18942	1.91856	1.91446	1.63909	2.40942
mmu-miR-466b-3-3p	0.261176	0.397897	1.62013	1.23305	1.70052	1.71514	2.30508	1.317
mmu-miR-26a	-0.196049	0.399001	12.6478	12.1055	12.1639	12.1639	12.1639	12.0012
mmu-miR-142-5p	-0.275895	0.399744	1.093	1.82691	0.901844	1.18889	1.22663	0.578541
mmu-miR-199b-star	0.284097	0.399934	1.94261	2.01675	2.73897	2.10817	2.4285	3.01396
mmu-miR-450a-3p	-0.190242	0.401114	1.27381	0.948442	1.50909	0.980915	1.06766	1.11204
mmu-miR-224	-0.17693	0.402749	1.79233	1.77149	1.64889	1.36103	1.54244	1.77844
mmu-miR-449c	0.208871	0.403587	1.41458	0.903975	0.83382	1.143	1.493	1.143
mmu-miR-770-5p	0.204628	0.405754	7.25967	7.4757	7.53378	7.49914	7.37866	8.00523
mmu-miR-18b	-0.194498	0.407275	0.968357	0.916166	0.88089	0.59321	0.49793	1.09078
mmu-miR-29a	-0.195621	0.408954	10.4502	9.8489	10.3836	10.024	10.0406	10.0313
mmu-miR-717	-0.290514	0.410235	2.33965	1.18964	1.63794	1.02544	1.62711	1.64314
mmu-miR-293	0.184229	0.410663	1.50604	1.4871	1.11111	1.72193	1.38449	1.55052
mmu-miR-743a	0.247882	0.410875	0.674248	1.23631	1.24978	1.62824	1.45301	0.822731
mmu-miR-30e-star	-0.342538	0.411604	3.12921	1.99373	1.92111	1.67944	1.74868	2.5883
mmu-miR-25	0.28152	0.415804	4.2685	3.37166	4.5084	4.01169	4.51609	4.46534
mmu-miR-135a	-0.189985	0.417436	1.35956	0.859177	1.02102	1.10723	0.733582	0.828988
mmu-miR-488	0.164251	0.420466	1.81437	2.08	2.16143	2.20857	2.13835	2.20162
mmu-miR-32	0.168093	0.420689	0.793609	1.1104	0.978207	1.02913	1.06905	1.28831
mmu-miR-15b-star	0.176323	0.422586	0.95664	0.554181	1.04552	1.00578	1.06187	1.01766
mmu-miR-464	-0.157707	0.424801	1.19775	1.43863	1.25653	1.10703	1.08547	1.22728
mmu-miR-499	-0.169737	0.427172	0.878046	1.1636	1.16305	1.06174	0.911082	0.722663
mmu-miR-195	0.165538	0.430611	7.12407	6.99124	7.32194	7.32888	7.16085	7.44413
mmu-miR-423-3p	-0.147627	0.432798	5.15794	5.15943	5.1133	4.93804	5.0266	5.02315
mmu-miR-463-star	-0.18722	0.436696	0.928487	1.43311	1.40553	0.902782	1.01507	1.28761
mmu-miR-30d	-0.182679	0.438311	7.94888	7.49364	7.81689	7.39686	7.83034	7.48417
mmu-miR-670	-0.282678	0.43884	1.52325	0.892216	2.23943	1.22041	1.52387	1.06258
mmu-miR-673-3p	-0.26901	0.44411	1.09841	2.30763	1.8795	1.43558	1.2367	1.80622
mmu-miR-331-5p	0.171368	0.447182	1.50447	1.42469	1.50508	1.76998	1.85448	1.3239
mmu-miR-689	0.291724	0.448635	0.861658	1.35626	1.86684	1.00942	1.81999	2.13053
mmu-miR-489	0.241409	0.450098	0.737879	1.54848	1.03688	1.49067	1.68621	0.870575
mmu-miR-759	0.160039	0.451274	2.36912	2.25762	2.54709	2.57506	2.71943	2.35946
mmu-miR-883a-3p	-0.24878	0.452065	1.59708	0.892216	2.05234	1.51168	1.143	1.14062
mmu-miR-669b	-0.261555	0.452343	1.32548	1.91649	1.35626	1.57988	1.63223	0.601447
mmu-miR-677	0.203511	0.456216	1.24971	0.594189	0.898771	1.48013	0.905691	0.967378
mmu-miR-539	0.218012	0.458716	2.27375	1.97635	1.33629	1.84992	2.18982	2.20068
mmu-miR-207	-0.282741	0.468234	2.85765	1.76707	3.01259	2.70812	2.05168	2.02928
mmu-miR-210	-0.242965	0.468803	4.6063	5.49743	5.2125	5.36409	4.518	4.70524
mmu-miR-295-star	-0.168891	0.469514	1.35896	1.71087	1.30307	1.45129	1.02053	1.3944
mmu-miR-326	-0.223719	0.472968	5.39313	5.06458	6.08234	5.22706	5.55056	5.09126
mmu-miR-181a	0.149114	0.473006	9.97436	10.2689	10.2433	10.42	10.1603	10.3535
mmu-miR-199a-3p	0.241142	0.473482	1.54093	1.54279	2.5991	2.11398	1.95721	2.33506
mmu-miR-149	0.145954	0.474846	8.14832	8.43052	8.34247	8.30929	8.55526	8.49462
mmu-miR-181a-1-star	0.180241	0.475514	4.38917	4.75114	4.64639	4.87549	5.05766	4.39427
mmu-miR-669c	0.311948	0.475543	3.6569	4.13632	3.10629	4.37518	3.08981	4.37036
mmu-miR-466d-5p	0.1544	0.478697	1.40002	1.08488	1.17488	1.36755	1.58056	1.17488
mmu-miR-470	0.155249	0.483162	1.81192	1.4428	1.95998	1.92289	1.94188	1.8157
mmu-miR-330	-0.130952	0.486874	5.81742	5.90916	5.90924	5.78609	5.69305	5.76383
mmu-miR-671-3p	0.231082	0.487033	1.92802	3.08344	2.50916	2.49393	2.72662	2.99332
mmu-miR-465c-3p	-0.138689	0.491986	1.26583	0.985519	0.927478	0.924891	0.917733	0.920131
mmu-miR-450b-3p	0.219624	0.495018	1.20164	0.654007	1.81799	1.27596	1.50936	1.54719
mmu-miR-590-3p	-0.215049	0.496493	0.9007	1.41367	1.53991	0.55886	1.50332	1.14696
mmu-miR-203-star	-0.251249	0.497118	1.10013	1.23319	1.75412	1.84754	0.835627	0.650534
mmu-miR-449a	0.162612	0.497395	1.19777	0.88653	0.666862	0.828489	1.24394	1.16657
mmu-miR-744	0.174931	0.500188	6.94745	7.59929	7.16236	7.63564	7.14519	7.45308
mmu-miR-675-5p	-0.236102	0.503847	1.78587	1.35626	1.94569	0.834175	1.48048	2.06486
mmu-miR-484	0.1689	0.506919	3.48174	3.28499	4.03871	3.74312	3.85793	3.7111
mmu-miR-30b-star	-0.255816	0.507624	1.15968	2.70191	1.86684	1.60234	1.71671	1.64194
mmu-let-7d-star	-0.200314	0.511969	4.98883	4.10956	4.86143	4.19699	4.39844	4.76345
mmu-miR-878-3p	-0.229554	0.51299	1.10013	1.1636	2.10711	0.924891	1.65715	1.10013
mmu-miR-684	-0.190183	0.51459	1.10291	0.662568	1.54168	1.12275	1.00528	0.608578
mmu-miR-764-5p	0.278601	0.515867	0.604446	1.4509	1.47392	2.28611	1.17618	0.902782
mmu-miR-217	0.132665	0.516686	0.941641	0.966393	0.906177	1.22044	0.848771	1.143
mmu-miR-101a-star	0.148243	0.52005	0.890637	1.18608	0.61407	1.18102	1.02923	0.925268
mmu-miR-668	0.135687	0.521212	6.17546	6.37134	6.55697	6.37578	6.49028	6.64477
mmu-miR-676-star	-0.256326	0.521894	2.53895	1.25259	1.26049	1.71514	1.06283	1.50508
mmu-miR-29c-star	-0.333363	0.521964	2.31653	2.05716	3.84446	2.80373	1.77345	2.64088
mmu-miR-15a	-0.178725	0.522746	4.34532	4.86455	5.06911	4.41897	4.92831	4.39552
mmu-let-7e	0.124478	0.526207	11.5456	11.7738	11.6279	11.831	11.6635	11.8263
mmu-miR-546	0.175466	0.531023	1.49454	1.21561	0.818756	1.00125	1.6825	1.37155
mmu-miR-301a	-0.421917	0.53209	2.03712	2.58647	3.78445	2.29265	3.61088	1.23874
mmu-miR-1193	-0.197979	0.532752	2.32055	1.59916	2.15263	1.3566	2.26256	1.85925
mmu-let-7d	0.120602	0.533075	11.8548	12.0344	11.8317	12.0218	11.9645	12.0964
mmu-miR-30a	-0.123022	0.543316	8.32251	8.08719	7.99962	8.09467	8.02427	7.92131
mmu-miR-488-star	-0.136173	0.545119	1.32455	1.1636	1.0479	1.0258	0.792326	1.30941
mmu-miR-10a	0.134886	0.548533	1.29147	0.795975	1.0583	1.143	1.05114	1.35626
mmu-miR-466f-3p	-0.141218	0.549302	6.5233	6.58004	7.08601	6.73336	6.48591	6.54643
mmu-miR-501-5p	0.274552	0.549613	1.59985	1.54279	2.75377	1.48041	2.78439	2.45526
mmu-miR-466k	0.182859	0.550866	0.918097	1.23003	0.981754	1.7934	0.728464	1.15659
mmu-miR-542-5p	-0.153158	0.552237	0.885301	1.47771	1.62398	1.04379	1.29914	1.18459
mmu-miR-708	0.119499	0.552343	7.80939	7.94186	7.6974	7.9405	7.79933	8.06731
mmu-miR-297b-5p	-0.112096	0.554991	1.10013	1.1636	1.04231	0.954886	0.933944	1.08092
mmu-miR-20a	0.166347	0.555286	5.4572	6.13514	5.258	5.97332	5.69052	5.68555
mmu-miR-19a-star	-0.157177	0.555573	1.63384	1.71837	1.92378	1.50669	2.05549	1.24229
mmu-miR-509-3p	0.126836	0.555659	1.4501	1.44375	1.44722	1.29676	1.63248	1.79233
mmu-miR-106a	0.307967	0.555911	4.01876	3.98613	3.19084	4.85493	2.8973	4.3674
mmu-miR-721	-0.125172	0.559781	1.45057	1.73887	1.89869	1.51992	1.50017	1.69252
mmu-miR-883a-5p	0.135565	0.559981	0.847067	0.74296	0.963407	0.732787	1.32456	0.902782
mmu-miR-200c-star	0.140664	0.561406	1.80463	1.97286	1.61709	2.05478	1.58536	2.17643
mmu-miR-125a-5p	-0.131545	0.562675	10.8821	10.7069	11.0236	10.5893	11.0382	10.5904
mmu-miR-1	0.175984	0.563279	1.48397	1.91102	1.78074	2.33003	1.33678	2.03688
mmu-miR-686	-0.139198	0.56704	1.32753	1.59648	1.2341	1.0676	1.60531	1.0676
mmu-miR-342-5p	0.153998	0.568528	5.39202	6.13244	5.77468	6.19467	5.67846	5.88801
mmu-miR-682	-0.139887	0.571313	0.833284	0.994378	1.14436	0.523853	1.20839	0.820115
mmu-miR-151-3p	-0.137372	0.571925	6.84468	7.05828	6.69006	7.06722	6.45392	6.65977
mmu-miR-701	-0.151826	0.571966	1.22481	1.78154	1.44745	1.67485	0.976431	1.34704
mmu-let-7c-2-star	-0.109258	0.575277	1.22793	1.19508	1.07066	1.10886	0.920008	1.13703
mmu-miR-486	0.151485	0.58027	5.26588	5.84479	4.94623	5.49802	5.41368	5.59966
mmu-miR-1197	0.159027	0.588341	1.20065	1.07171	0.921226	1.63571	0.658182	1.37678
mmu-miR-339-5p	-0.173763	0.590511	5.2077	4.25877	4.93433	4.27066	4.61112	4.99772
mmu-miR-452	0.138321	0.592574	1.305	1.4943	0.931414	1.50358	1.60405	1.03805
mmu-miR-153	-0.3182	0.594253	5.41055	3.91267	2.91443	3.52026	3.59316	4.16962
mmu-miR-186	0.121251	0.597148	0.770509	1.18327	1.19605	0.944209	1.31975	1.24963
mmu-miR-362-5p	0.19766	0.598404	4.40035	4.04632	3.47505	3.77242	4.84768	3.8946
mmu-miR-467h	0.151153	0.599531	0.645768	0.732724	1.29003	1.466	0.848646	0.807329
mmu-miR-30e	-0.140529	0.601746	5.71728	5.72285	5.29443	5.47599	5.79551	5.04148
mmu-miR-301b	0.284795	0.602199	1.99215	1.1636	0.568186	2.61331	0.961362	1.00365
mmu-miR-1187	-0.235285	0.609723	4.87789	5.3605	4.47127	4.11594	4.22453	5.66335
mmu-miR-220	0.16164	0.611789	1.79139	1.2416	0.776065	1.76639	1.143	1.38458
mmu-miR-485-star	-0.179706	0.615909	3.50997	2.94772	3.12736	3.02938	2.36248	3.65406
mmu-miR-30b	-0.108396	0.617443	7.25905	6.94449	7.2492	7.00197	7.25388	6.8717
mmu-miR-453	-0.132551	0.620584	1.66104	1.08408	1.86934	1.20822	1.43087	1.57772
mmu-miR-1186	0.199739	0.621665	1.35626	1.7529	2.72223	2.64742	1.82989	1.9533
mmu-let-7c-1-star	-0.116529	0.623716	2.15275	1.89164	1.54713	1.57944	1.75472	1.90778
mmu-miR-290-5p	0.116605	0.62913	1.51366	1.52796	1.47925	1.68344	1.94865	1.2386
mmu-miR-669k	-0.123917	0.631512	1.54079	0.720927	1.09662	1.07308	0.920008	0.993498
mmu-miR-485	0.121255	0.631644	6.7718	7.22992	6.73815	7.11877	6.71185	7.27301
mmu-miR-503	0.134619	0.633044	2.20107	1.52689	1.73232	2.35863	1.76395	1.74155
mmu-miR-500	0.113076	0.633068	6.48482	6.48816	6.166	6.28931	6.8237	6.3652
mmu-miR-376c	-0.153214	0.634219	0.690216	1.70595	1.09313	0.644567	1.28496	1.10013
mmu-miR-362-3p	0.116986	0.635667	1.44229	1.63093	1.78934	1.37461	2.04036	1.79855
mmu-miR-466c-3p	-0.130198	0.645172	1.80769	1.09869	1.18102	1.51077	1.28326	0.902782
mmu-miR-146b-star	-0.12691	0.646886	1.19777	2.01605	1.19088	1.36249	1.37988	1.2816
mmu-miR-300	0.0910754	0.648233	8.04479	8.02311	8.20653	8.04704	8.34068	8.15995
mmu-miR-711	-0.142581	0.652309	2.41385	2.09569	1.88149	1.52783	2.56682	1.86864
mmu-miR-376c-star	-0.0922345	0.654314	1.06049	1.12866	1.10338	0.877844	1.24903	0.888945
mmu-miR-582-5p	-0.121465	0.654489	1.85324	1.68729	0.987482	1.41522	1.3712	1.37719
mmu-miR-695	-0.0972401	0.656356	1.05757	0.866297	1.37135	1.09158	0.90122	1.01069
mmu-miR-302b-star	0.112221	0.656658	1.79233	2.30956	2.47263	2.09606	2.42992	2.38521
mmu-miR-467e-star	-0.384719	0.658975	4.82535	2.70325	1.68132	3.99405	1.98749	2.07422
mmu-miR-183-star	-0.107546	0.660602	0.769275	0.992997	1.33212	1.14757	0.95847	0.665715
mmu-miR-138	0.0853799	0.660703	11.3668	11.3372	11.3889	11.2885	11.5667	11.4939
mmu-miR-761	0.121464	0.66126	0.692539	0.900829	1.35391	0.739313	1.40779	1.16457
mmu-miR-29b	0.10835	0.661579	5.37831	5.49391	5.89026	5.47774	5.60923	6.00057
mmu-miR-742	-0.106605	0.664554	1.74124	1.90414	1.60261	1.49764	2.03644	1.3941
mmu-miR-697	0.120382	0.666492	0.779073	1.47161	1.60545	1.24963	1.6262	1.34145
mmu-miR-16-star	0.103107	0.671433	1.08781	1.53387	1.53405	1.62069	1.65715	1.1872
mmu-miR-667	-0.122049	0.672992	5.26988	5.72884	5.84772	5.20888	5.30181	5.96959
mmu-miR-22	0.0887668	0.675684	9.55868	9.15422	9.30336	9.37705	9.5801	9.32541
mmu-miR-369-3p	-0.0827753	0.676065	0.838002	1.13398	0.857521	0.812163	0.874747	0.894266
mmu-miR-872-star	0.209864	0.683024	3.95913	2.31769	3.04572	2.49148	3.53346	3.9272
mmu-miR-467g	-0.170809	0.684033	2.33964	1.18942	1.69958	0.996772	2.28167	1.43776
mmu-miR-18a-star	-0.130797	0.686912	2.03479	1.55013	0.843999	1.264	1.25311	1.51942
mmu-miR-466l	-0.0857894	0.6907	1.25897	0.882256	1.14458	1.12093	0.807376	1.10013
mmu-miR-299-star	-0.279036	0.692179	3.69876	3.77528	1.19624	3.23859	2.43356	2.16102
mmu-miR-465b-3p	-0.111228	0.692587	1.35626	1.58752	1.55469	1.50878	1.79233	0.863672
mmu-miR-504	-0.3017	0.693242	3.22089	1.60705	3.41255	2.10367	1.24963	3.98209
mmu-miR-1196	-0.0967856	0.693911	6.97932	7.31641	7.69185	7.34698	7.25125	7.09899
mmu-miR-335-3p	0.129052	0.697264	1.18592	1.35017	1.31674	2.13036	1.1725	0.937128
mmu-miR-127-star	0.0857228	0.698815	6.68425	6.74002	6.80497	6.50554	6.98504	6.99584
mmu-miR-466e-5p	0.0895484	0.702806	1.12436	0.934366	1.36144	1.46735	1.27185	0.949616
mmu-miR-875-5p	-0.11377	0.702825	0.876134	1.47351	1.69944	0.952123	1.60854	1.1471
mmu-miR-760	0.363031	0.704266	4.36457	5.26383	1.46807	4.82772	3.1094	4.24844
mmu-miR-345-5p	-0.126595	0.704904	5.42293	5.00753	6.10291	5.05976	5.36965	5.72417
mmu-miR-700	0.101728	0.70812	4.56827	4.59893	4.01807	4.23999	4.38454	4.86592
mmu-miR-467d	0.0835761	0.709013	1.45165	1.46635	1.00765	1.34731	1.27855	1.55052
mmu-miR-291a-3p	-0.0993629	0.716612	1.88603	1.36746	1.28665	1.79109	1.3144	1.13656
mmu-miR-699	-0.197468	0.717385	2.52882	2.85403	3.89575	3.86475	2.85166	1.96979
mmu-let-7f	-0.0892267	0.717621	7.35386	6.73331	6.68069	6.76518	6.90838	6.82663
mmu-miR-493	-0.0740303	0.718424	1.68781	1.71046	1.33445	1.5016	1.53547	1.47355
mmu-miR-568	-0.103439	0.71856	1.63648	1.18292	0.755414	0.843999	1.06424	1.35626
mmu-miR-714	-0.113531	0.720012	2.46888	1.59554	2.63197	2.21417	1.87454	2.26708
mmu-miR-291b-3p	0.0852528	0.720614	1.75085	1.64593	1.19736	1.72462	1.39355	1.73172
mmu-miR-136-star	-0.0810311	0.723717	1.65279	1.49338	1.28093	1.38385	1.143	1.65715
mmu-miR-881	0.0791269	0.725408	0.683926	1.06164	1.07907	1.25552	0.917733	0.888766
mmu-miR-467a-star	0.147049	0.728849	2.27691	2.12225	2.71909	1.59602	2.76819	3.19518
mmu-miR-211	0.0816139	0.732523	1.82912	2.01127	1.64583	2.23559	1.63664	1.85883
mmu-miR-24	-0.0637501	0.734326	11.3366	11.492	11.3569	11.3438	11.3664	11.284
mmu-miR-465a-5p	-0.0884634	0.735445	1.28954	1.54565	0.896774	0.845698	1.39917	1.2217
mmu-miR-743b-3p	-0.0763325	0.73694	0.901342	1.2698	0.658668	0.911476	0.858648	0.830685
mmu-miR-106b	0.0711765	0.737413	6.67926	6.45877	6.25542	6.54121	6.66054	6.40522
mmu-miR-338-5p	-0.0706665	0.743632	6.18784	6.15776	5.78329	6.06717	6.0365	5.81322
mmu-miR-10a-star	0.0948667	0.74382	1.10013	0.850157	1.63232	1.67091	1.05331	1.143
mmu-miR-1188	0.0979266	0.746169	2.43619	1.97886	2.24517	1.82831	2.28503	2.84066
mmu-miR-450a-5p	0.0944259	0.748279	0.929614	1.16515	0.902782	0.920552	0.690116	1.67016
mmu-miR-325	-0.0740364	0.749102	1.51158	1.83369	2.04005	1.86481	1.50581	1.79259
mmu-miR-184	-0.202341	0.754102	3.25954	4.30595	1.57332	3.23813	2.45907	2.83459
mmu-miR-27b-star	0.0984684	0.754353	1.87578	0.957449	1.19556	1.43733	1.79423	1.09264
mmu-miR-742-star	-0.0896835	0.754757	1.29147	1.0424	0.848481	1.45568	0.539194	0.918419
mmu-miR-367	0.0754847	0.75747	1.0772	0.736807	1.26659	1.11571	1.35626	0.835067
mmu-miR-135a-star	0.0604331	0.758452	1.51706	1.68863	1.39495	1.54279	1.5619	1.67725
mmu-miR-466j	0.074352	0.765603	1.96938	1.66849	1.42419	1.46807	1.78974	2.02729
mmu-miR-92a-star	0.0664363	0.765765	1.79374	1.62452	1.29283	1.57988	1.5265	1.80401
mmu-miR-463	-0.0756175	0.766396	1.03928	0.970933	1.50234	0.843999	1.03036	1.41134
mmu-miR-1-2-as	0.0585028	0.770131	1.29421	1.33721	1.62396	1.42608	1.47156	1.53325
mmu-miR-145-star	-0.0901607	0.770254	0.932208	0.729156	1.31692	0.924891	1.38262	0.40029
mmu-miR-208b	0.121571	0.771613	1.73944	0.262569	1.66701	1.05187	1.53911	1.44275
mmu-miR-197	-0.0821279	0.778027	2.38915	1.88162	1.81729	1.62456	1.79412	2.42299
mmu-miR-590-5p	0.06744	0.779166	0.902852	1.0887	1.37633	0.902782	1.22667	1.44074
mmu-miR-669i	-0.0955688	0.780636	1.66682	2.08871	0.87746	1.70043	1.16244	1.48341
mmu-let-7i-star	-0.1314	0.782441	3.1595	1.463	1.82727	1.88965	2.55571	1.6102
mmu-miR-196b	-0.0839616	0.782642	1.61909	2.08467	1.12277	1.49384	1.83119	1.24963
mmu-miR-707	-0.0621142	0.783379	0.974092	0.762463	1.20582	0.701828	0.929795	1.12441
mmu-miR-191-star	-0.0663769	0.786057	2.16357	1.84971	2.40538	1.8999	1.95804	2.36157
mmu-miR-465b-5p	0.0698035	0.792973	1.36208	0.835031	0.850254	1.36826	0.721387	1.16713
mmu-miR-340-3p	-0.0599749	0.799338	0.726223	1.008	1.36542	1.10099	0.972728	0.846002
mmu-miR-125b-5p	-0.0551891	0.800705	11.942	11.4963	11.9564	11.6847	11.8479	11.6966
mmu-miR-719	-0.0630901	0.802895	2.42043	1.64799	2.20097	2.06876	2.06283	1.94854
mmu-miR-328	0.0540231	0.805686	7.49855	7.4179	7.83124	7.43308	7.74211	7.73456
mmu-miR-471	-0.0504771	0.805708	1.02545	0.922415	1.143	0.834175	0.917733	1.18752
mmu-miR-680	-0.0578285	0.806106	2.33255	2.18549	2.38601	1.93207	2.21328	2.58522
mmu-miR-337-3p	-0.0594742	0.809746	2.44785	1.73553	2.30403	2.08608	2.18683	2.03607
mmu-miR-201	0.0475131	0.818792	1.48517	1.23255	1.49568	1.32349	1.64523	1.38723
mmu-miR-669h-5p	-0.0637275	0.818802	1.38159	2.05346	1.70378	1.79844	1.24891	1.9003
mmu-miR-654-5p	0.0487104	0.822676	1.22626	1.00567	1.34971	1.24963	1.03036	1.44777
mmu-miR-710	0.053702	0.823647	1.69465	2.06843	1.79213	2.08611	1.55052	2.07968
mmu-miR-743b-5p	0.0593008	0.825613	1.56569	1.0652	1.08576	1.62069	1.36284	0.91102
mmu-miR-574-3p	0.137255	0.829646	4.20497	6.22754	4.24609	5.8063	4.17616	5.10791
mmu-miR-27b	-0.0464716	0.829676	8.09185	7.62387	7.70137	7.74043	7.85681	7.68043
mmu-miR-292-3p	0.0534473	0.829835	0.798167	1.36389	1.20599	1.42615	0.90845	1.19379
mmu-miR-99b-star	0.107349	0.831371	4.16086	4.79062	4.56943	5.17926	3.41345	5.25026
mmu-miR-703	-0.050443	0.83186	1.60648	1.49848	1.99433	1.38467	1.72732	1.83597
mmu-miR-652	-0.0483624	0.83315	7.74586	7.88232	7.60929	7.81975	7.36513	7.9075
mmu-miR-544	0.0496095	0.83804	0.748681	0.952243	0.753284	0.9877	0.47234	1.143
mmu-miR-337-5p	-0.0446812	0.838302	6.93539	6.73125	6.56687	6.46694	6.87204	6.76048
mmu-miR-203	0.0896016	0.839653	1.60042	2.93902	1.27387	2.35001	1.73561	1.99649
mmu-let-7i	0.054963	0.842594	9.55501	8.83067	9.41108	9.05079	9.62945	9.28141
mmu-miR-693-3p	0.054563	0.843035	1.4391	0.877308	0.979698	1.46807	0.742096	1.24963
mmu-miR-450b-5p	-0.0416619	0.848225	0.721822	0.723824	1.16658	0.825105	0.734463	0.927675
mmu-miR-196a	-0.0355455	0.84922	0.976163	1.05774	0.915137	1.00578	0.895018	0.941602
mmu-miR-1191	0.0431248	0.849421	0.687432	1.12028	0.953769	0.711465	1.137	1.04239
mmu-miR-325-star	0.0581462	0.850432	3.9665	3.76117	3.49518	4.40081	3.56052	3.43596
mmu-miR-505	-0.0541599	0.852804	1.55593	1.58844	1.20595	1.28923	1.92335	0.975264
mmu-miR-1194	0.0597197	0.854438	1.72931	1.43823	0.563178	1.47226	1.21684	1.22077
mmu-miR-411	0.0411486	0.860612	6.14852	5.59427	5.86436	5.85202	5.74906	6.12951
mmu-miR-376a	0.0550565	0.864124	5.75563	5.20947	6.16038	5.36204	6.13208	5.79653
mmu-miR-598	0.0492621	0.864688	3.26056	2.70191	2.75193	2.65714	2.77401	3.43104
mmu-miR-378-star	0.0694222	0.865236	3.29328	2.80763	4.02588	2.78286	3.65415	3.89805
mmu-miR-22-star	-0.0530363	0.866135	1.4054	2.00905	1.24963	1.33956	1.16809	1.99732
mmu-miR-376a-star	0.0595058	0.870056	1.22452	0.908024	0.767224	0.59321	1.8225	0.662568
mmu-miR-291b-5p	-0.0564968	0.871313	1.647	0.816751	2.03401	1.26423	1.27974	1.7843
mmu-miR-376b	-0.055626	0.871379	6.54309	5.26577	5.8684	5.80591	6.06665	5.63783
mmu-miR-294-star	-0.0404498	0.873394	2.66643	2.11373	1.92358	2.22307	2.31122	2.0481
mmu-miR-763	-0.0483719	0.874515	1.65715	2.50347	2.37939	2.4621	2.1509	1.7819
mmu-miR-382-star	0.0390393	0.879037	1.63779	1.40294	0.836227	1.32472	1.26832	1.40102
mmu-miR-96	-0.0334464	0.88246	1.18998	0.79288	1.32008	0.903984	1.1385	1.16012
mmu-miR-410	-0.103278	0.883531	3.82342	1.80571	3.09933	1.59544	2.82072	4.00246
mmu-miR-140	0.0852065	0.884607	1.76754	1.90414	3.68831	2.93728	2.97666	1.70167
mmu-miR-16	0.0266305	0.888401	9.88103	9.6738	9.73854	9.73314	9.8387	9.80142
mmu-miR-302a-star	0.0330095	0.888673	1.47626	0.950667	1.42894	1.35423	1.48467	1.116
mmu-miR-30c-2-star	0.0728969	0.890168	3.23958	5.24637	4.19044	3.65602	4.57308	4.66599
mmu-miR-467a	0.0447296	0.892146	2.98811	2.21482	2.39226	2.01074	2.81828	2.90036
mmu-miR-148a-star	-0.0373096	0.894619	1.34648	0.732724	1.71319	1.17931	1.24266	1.2585
mmu-miR-706	-0.0915345	0.897387	6.85036	4.19671	6.51158	6.49965	5.58177	5.20263
mmu-miR-322-star	0.0279344	0.89742	2.20518	2.28166	1.81636	2.02014	2.22624	2.14062
mmu-miR-26b	-0.0273039	0.89789	3.95012	3.96143	3.7988	4.04373	3.97846	3.60624
mmu-miR-137	0.0456429	0.899085	4.10116	3.93659	4.07146	4.612	4.36386	3.27028
mmu-let-7a	-0.0347366	0.899353	11.2029	10.5187	10.8905	10.5437	11.1938	10.7704
mmu-miR-678	0.0492582	0.901025	2.54619	1.18463	1.73659	1.66254	1.57307	2.37958
mmu-miR-188-3p	0.0316304	0.901708	1.44996	1.07171	1.46807	1.10791	1.76217	1.21455
mmu-miR-208a	-0.0308432	0.902355	1.61446	1.21081	1.7007	1.41413	1.808	1.21131
mmu-miR-687	-0.033018	0.902364	0.843999	1.5148	0.998855	0.880335	0.954577	1.42369
mmu-miR-673-5p	0.0376705	0.905401	4.28097	3.89109	4.93629	4.08157	4.51912	4.62066
mmu-miR-381	0.0372125	0.906405	6.28416	5.54067	6.20613	5.58694	6.46048	6.09518
mmu-miR-615-3p	-0.029082	0.907085	1.83806	1.79227	1.1763	1.52173	1.47265	1.72502
mmu-miR-483	-0.0314859	0.908741	2.55271	2.44328	3.29869	2.62227	2.76788	2.81008
mmu-miR-466b-5p	0.0284851	0.908789	1.15299	0.903041	1.10204	0.88818	1.50581	0.849538
mmu-miR-465a-3p	-0.0236401	0.909901	0.770509	1.08571	0.96998	0.902782	1.09838	0.75411
mmu-miR-181a-2-star	0.0330761	0.912674	1.2103	2.29692	1.63576	1.63378	1.78321	1.82522
mmu-miR-873	0.026936	0.91286	3.08703	3.23858	3.6003	3.58936	3.03957	3.37779
mmu-miR-138-star	0.0228435	0.914831	6.40851	6.63752	6.39441	6.73433	6.30265	6.47199
mmu-miR-369-5p	-0.0447144	0.914978	4.15364	2.89829	4.55108	3.79383	3.97734	3.69769
mmu-miR-10b-star	-0.0258619	0.916203	1.56752	1.28912	0.843999	1.12202	1.3333	1.16773
mmu-miR-692	0.0423596	0.920957	1.53281	1.03953	1.77514	1.52474	2.28725	0.662568
mmu-miR-466c-5p	-0.0268873	0.921181	1.21459	1.94468	1.5418	1.76106	1.21173	1.64762
mmu-miR-379	0.0211562	0.921955	7.99281	8.30843	8.10255	8.25445	7.91042	8.3024
mmu-miR-702	-0.0270811	0.92312	3.73679	3.61066	4.09134	3.30699	3.92438	4.12617
mmu-miR-718	-0.0232126	0.923388	2.01767	2.5049	2.42595	2.0347	2.29724	2.54694
mmu-miR-148b	0.0379992	0.924545	2.34042	0.973884	0.849343	1.39901	1.39523	1.48341
mmu-miR-216b	-0.022243	0.926081	0.964235	0.875569	1.4323	0.843999	1.1304	1.23098
mmu-miR-693-5p	0.0240517	0.927767	1.01898	1.12716	0.993498	0.683926	1.55052	0.977348
mmu-miR-155	-0.0414056	0.928037	1.07186	1.65461	2.92243	1.62069	2.09322	1.81076
mmu-miR-291a-5p	0.0268313	0.930423	1.37128	1.58469	1.34033	1.0207	1.26938	2.08672
mmu-miR-1190	-0.0232655	0.93208	2.56504	2.01564	2.50168	1.96828	2.35199	2.69229
mmu-miR-302c	0.0269789	0.932784	1.33754	0.727379	1.43605	1.71965	1.05992	0.802331
mmu-miR-302c-star	0.018273	0.934383	1.26767	1.30191	1.61242	1.36281	1.65535	1.21866
mmu-miR-688	0.0321558	0.934664	1.4041	1.33337	1.52022	2.34578	0.804611	1.20377
mmu-miR-409-5p	0.0171671	0.934771	6.50393	6.73198	6.64782	6.49307	6.88426	6.55789
mmu-miR-374-star	0.0233123	0.934839	0.849804	1.11217	1.4254	1.63471	0.886671	0.935922
mmu-miR-1199	-0.0214458	0.94042	2.11636	1.39535	1.90117	1.38486	1.8932	2.07048
mmu-miR-467c	0.0289861	0.940682	0.803901	1.99029	0.902782	0.959877	1.04346	1.7806
mmu-miR-327	0.0230517	0.941681	1.87978	2.04649	1.47933	1.42596	1.63629	2.41249
mmu-miR-741	0.0262615	0.941999	1.3709	1.82045	0.976318	1.87911	0.756785	1.61056
mmu-miR-218	-0.0224402	0.9428	3.90633	4.01135	4.64913	4.57124	3.71396	4.21429
mmu-miR-214	0.0315203	0.945655	2.0492	3.77613	3.66151	3.38568	2.9901	3.20561
mmu-miR-202-3p	-0.0137143	0.947144	1.20041	1.58844	1.42684	1.51113	1.28587	1.37755
mmu-miR-92a	0.0175951	0.948911	5.77958	5.82824	6.45454	5.70476	6.24059	6.16979
mmu-miR-151-5p	0.0114056	0.952339	9.15862	9.34029	9.1222	9.15711	9.24623	9.25199
mmu-miR-342-3p	-0.0125685	0.954301	9.51535	10.0101	9.63689	9.79628	9.57971	9.74861
mmu-miR-7a-star	0.0176035	0.959624	2.27281	2.29939	2.31236	2.02117	3.09644	1.81976
mmu-miR-713	0.0143396	0.963388	1.4832	1.50542	2.14939	2.22193	1.34151	1.61759
mmu-miR-350	-0.0106891	0.973233	1.72931	1.99343	2.34316	1.6817	2.61272	1.73942
mmu-miR-192	-0.017725	0.974964	2.51943	3.11641	3.0462	2.40833	4.23615	1.98439
mmu-miR-15a-star	-0.0086559	0.976251	1.47792	1.68438	0.88153	1.49451	0.972134	1.55123
mmu-miR-758	0.00849449	0.978673	0.828001	1.79177	1.2965	0.903137	1.59262	1.446
mmu-miR-105	-0.00677652	0.979202	1.49866	1.55823	1.58665	1.83563	1.05143	1.73615
mmu-miR-214-star	-0.00645323	0.981191	0.746174	1.15124	1.6272	0.974046	1.29878	1.23242
mmu-miR-451	-0.00497561	0.984771	2.21268	1.92673	2.49054	2.51959	1.86704	2.2284
mmu-miR-709	0.00207912	0.990917	13.5576	13.5522	13.5522	13.5553	13.5517	13.5613
mmu-miR-875-3p	-0.00261115	0.992002	1.19777	0.738034	0.681356	1.22337	0.801892	0.584066
mmu-miR-679	0.00313329	0.992771	1.50886	1.72931	1.94396	1.1244	2.40998	1.65715
mmu-miR-466a-3p	0.000897507	0.997458	2.01876	1.76666	1.1919	1.96038	1.53391	1.48573
